# Supplementary material for: Evaluation of tumor immune contexture among intrinsic molecular subtypes helps to predict outcome in early breast cancer
Source: HighWire-hosted journal article supplement (doi:10.1136/jitc-2020-002036), 2021-06-01
Supplement: jitc-2020-002036supp004_data_supplement.xlsx [file jitc-2020-002036supp004_data_supplement.xlsx]

## Sheet: Affymetrix
Sample.ID	Dataset.ID	Reported phenotype		Recoded phenotype	Level 1	Level 2	Level 3	Level 4
GSM143717	GSE6257	Dermal Lymphatic Endothelium	Lymphatics	stroma	not kept	not kept	not kept	stroma
GSM143898	GSE6257	Dermal Lymphatic Endothelium	Lymphatics	stroma	not kept	not kept	not kept	stroma
GSM143900	GSE6257	Dermal Lymphatic Endothelium	Lymphatics	stroma	not kept	not kept	not kept	stroma
GSM143907	GSE6257	Dermal Lymphatic Endothelium +TNF	Lymphatics	stroma	not kept	not kept	not kept	stroma
GSM143910	GSE6257	Dermal Lymphatic Endothelium +TNF	Lymphatics	stroma	not kept	not kept	not kept	stroma
GSM143914	GSE6257	Dermal Lymphatic Endothelium +TNF	Lymphatics	stroma	not kept	not kept	not kept	stroma
GSM370403	GSE14801	HUVECs with empty RNA Vector	Endothelium	stroma	not kept	not kept	not kept	stroma
GSM370404	GSE14801	HUVECs with empty RNA Vector	Endothelium	stroma	not kept	not kept	not kept	stroma
GSM244651	GSE9677	HUVECs sparse	Endothelium	stroma	not kept	not kept	not kept	stroma
GSM244653	GSE9677	HUVECs sparse	Endothelium	stroma	not kept	not kept	not kept	stroma
GSM244647	GSE9677	HUVECs confluent	Endothelium	stroma	not kept	not kept	not kept	stroma
GSM244649	GSE9677	HUVECs confluent	Endothelium	stroma	not kept	not kept	not kept	stroma
GSM244652	GSE9677	HUVECs sparse + angiopoietin	Endothelium	stroma	not kept	not kept	not kept	stroma
GSM244654	GSE9677	HUVECs sparse + angiopoietin	Endothelium	stroma	not kept	not kept	not kept	stroma
GSM244648	GSE9677	HUVECs confluent + angiopoietin	Endothelium	stroma	not kept	not kept	not kept	stroma
GSM244650	GSE9677	HUVECs confluent + angiopoietin	Endothelium	stroma	not kept	not kept	not kept	stroma
GSM143726	GSE6241	HUVECs	Endothelium	stroma	not kept	not kept	not kept	stroma
GSM143727	GSE6241	HUVECs	Endothelium	stroma	not kept	not kept	not kept	stroma
GSM143728	GSE6241	HUVECs + Serum Amyloid a (4h)	Endothelium	stroma	not kept	not kept	not kept	stroma
GSM143729	GSE6241	HUVECs + Serum Amyloid a (4h)	Endothelium	stroma	not kept	not kept	not kept	stroma
GSM143730	GSE6241	HUVECs + Serum Amyloid a (24h)	Endothelium	stroma	not kept	not kept	not kept	stroma
GSM143731	GSE6241	HUVECs + Serum Amyloid a (24h)	Endothelium	stroma	not kept	not kept	not kept	stroma
GSM143732	GSE6241	HUVECs + Serum Amyloid a (48h)	Endothelium	stroma	not kept	not kept	not kept	stroma
GSM143733	GSE6241	HUVECs + Serum Amyloid a (48h)	Endothelium	stroma	not kept	not kept	not kept	stroma
GSM841026	GSE34053	Cancer Associated Friboblasts_x000D_ Primary cultures	Fibroblast	stroma	not kept	not kept	not kept	stroma
GSM841027	GSE34053	Cancer Associated Friboblasts_x000D_ Primary cultures	Fibroblast	stroma	not kept	not kept	not kept	stroma
GSM841028	GSE34053	Cancer Associated Friboblasts_x000D_ Primary cultures	Fibroblast	stroma	not kept	not kept	not kept	stroma
GSM724521	GSE29316	Colon Myofibroblast CCD-18Co	Fibroblast	stroma	not kept	not kept	not kept	stroma
GSM724522	GSE29316	Colon Myofibroblast CCD-18Co	Fibroblast	stroma	not kept	not kept	not kept	stroma
GSM724523	GSE29316	Colon Myofibroblast CCD-18Co	Fibroblast	stroma	not kept	not kept	not kept	stroma
GSM724524	GSE29316	Colon Myofibroblast CCD-18Co_x000D_ + 72h Sonic Hedgehog Homolog	Fibroblast	stroma	not kept	not kept	not kept	stroma
GSM724525	GSE29316	Colon Myofibroblast CCD-18Co_x000D_ + 72h Sonic Hedgehog Homolog	Fibroblast	stroma	not kept	not kept	not kept	stroma
GSM724526	GSE29316	Colon Myofibroblast CCD-18Co_x000D_ + 72h Sonic Hedgehog Homolog	Fibroblast	stroma	not kept	not kept	not kept	stroma
GSM418744	GSE16715	Primary cultures from 9 young girls	Fibroblast	stroma	not kept	not kept	not kept	stroma
GSM418745	GSE16715	Primary cultures from 9 young girls	Fibroblast	stroma	not kept	not kept	not kept	stroma
GSM418746	GSE16715	Primary cultures from 9 young girls	Fibroblast	stroma	not kept	not kept	not kept	stroma
GSM418747	GSE16715	Primary cultures from 9 young girls	Fibroblast	stroma	not kept	not kept	not kept	stroma
GSM418748	GSE16715	Primary cultures from 9 young girls	Fibroblast	stroma	not kept	not kept	not kept	stroma
GSM418749	GSE16715	Primary cultures from 9 young girls	Fibroblast	stroma	not kept	not kept	not kept	stroma
GSM418750	GSE16715	Primary cultures from 9 young girls	Fibroblast	stroma	not kept	not kept	not kept	stroma
GSM418751	GSE16715	Primary cultures from 9 young girls	Fibroblast	stroma	not kept	not kept	not kept	stroma
GSM418752	GSE16715	Primary cultures from 9 young girls	Fibroblast	stroma	not kept	not kept	not kept	stroma
GSM418753	GSE16715	Primary cultures from 8 young girls_x000D_ with WBS syndrome	Fibroblast	stroma	not kept	not kept	not kept	stroma
GSM418754	GSE16715	Primary cultures from 8 young girls_x000D_ with WBS syndrome	Fibroblast	stroma	not kept	not kept	not kept	stroma
GSM418755	GSE16715	Primary cultures from 8 young girls_x000D_ with WBS syndrome	Fibroblast	stroma	not kept	not kept	not kept	stroma
GSM418756	GSE16715	Primary cultures from 8 young girls_x000D_ with WBS syndrome	Fibroblast	stroma	not kept	not kept	not kept	stroma
GSM418757	GSE16715	Primary cultures from 8 young girls_x000D_ with WBS syndrome	Fibroblast	stroma	not kept	not kept	not kept	stroma
GSM418758	GSE16715	Primary cultures from 8 young girls_x000D_ with WBS syndrome	Fibroblast	stroma	not kept	not kept	not kept	stroma
GSM418759	GSE16715	Primary cultures from 8 young girls_x000D_ with WBS syndrome	Fibroblast	stroma	not kept	not kept	not kept	stroma
GSM418760	GSE16715	Primary cultures from 8 young girls_x000D_ with WBS syndrome	Fibroblast	stroma	not kept	not kept	not kept	stroma
GSM484752	GSE19510	WI-38 cells exposed to DMSO 24h	Fibroblast	stroma	not kept	not kept	not kept	stroma
GSM484813	GSE19510	WI-38 cells exposed to DMSO 24h	Fibroblast	stroma	not kept	not kept	not kept	stroma
GSM484814	GSE19510	WI-38 cells exposed to DMSO 24h	Fibroblast	stroma	not kept	not kept	not kept	stroma
GSM484815	GSE19510	WI-38 cells exposed to DMSO 24h	Fibroblast	stroma	not kept	not kept	not kept	stroma
GSM484816	GSE19510	WI-38 cells exposed to DMSO_x000D_ + 1uM BPDE (strong carcinogen) 24h	Fibroblast	stroma	not kept	not kept	not kept	stroma
GSM484817	GSE19510	WI-38 cells exposed to DMSO_x000D_ + 1uM BPDE (strong carcinogen) 24h	Fibroblast	stroma	not kept	not kept	not kept	stroma
GSM484818	GSE19510	WI-38 cells exposed to DMSO_x000D_ + 1uM BPDE (strong carcinogen) 24h	Fibroblast	stroma	not kept	not kept	not kept	stroma
GSM484819	GSE19510	WI-38 cells exposed to DMSO_x000D_ + 1uM BPDE (strong carcinogen) 24h	Fibroblast	stroma	not kept	not kept	not kept	stroma
GSM486528	GSE19510	WI-38 cells exposed to DMSO_x000D_ + 0.5uM BPDE (strong carcinogen) 24h	Fibroblast	stroma	not kept	not kept	not kept	stroma
GSM486529	GSE19510	WI-38 cells exposed to DMSO_x000D_ + 0.5uM BPDE (strong carcinogen) 24h	Fibroblast	stroma	not kept	not kept	not kept	stroma
GSM486530	GSE19510	WI-38 cells exposed to DMSO_x000D_ + 0.5uM BPDE (strong carcinogen) 24h	Fibroblast	stroma	not kept	not kept	not kept	stroma
GSM486531	GSE19510	WI-38 cells exposed to DMSO_x000D_ + 0.1uM BPDE (strong carcinogen) 24h	Fibroblast	stroma	not kept	not kept	not kept	stroma
GSM486532	GSE19510	WI-38 cells exposed to DMSO_x000D_ + 0.1uM BPDE (strong carcinogen) 24h	Fibroblast	stroma	not kept	not kept	not kept	stroma
GSM486533	GSE19510	WI-38 cells exposed to DMSO_x000D_ + 0.1uM BPDE (strong carcinogen) 24h	Fibroblast	stroma	not kept	not kept	not kept	stroma
GSM194109	GSE7890	Primary cultures of fibroblasts from_x000D_ keloid scar (no hydrocortisone)	Fibroblast	stroma	not kept	not kept	not kept	stroma
GSM194110	GSE7890	Primary cultures of fibroblasts from_x000D_ keloid scar (no hydrocortisone)	Fibroblast	stroma	not kept	not kept	not kept	stroma
GSM194111	GSE7890	Primary cultures of fibroblasts from_x000D_ keloid scar (no hydrocortisone)	Fibroblast	stroma	not kept	not kept	not kept	stroma
GSM194112	GSE7890	Primary cultures of fibroblasts from_x000D_ keloid scar (no hydrocortisone)	Fibroblast	stroma	not kept	not kept	not kept	stroma
GSM194113	GSE7890	Primary cultures of fibroblasts from_x000D_ keloid scar (no hydrocortisone)	Fibroblast	stroma	not kept	not kept	not kept	stroma
GSM194118	GSE7890	Primary cultures of fibroblasts from_x000D_ normal scar (no hydrocortisone)	Fibroblast	stroma	not kept	not kept	not kept	stroma
GSM194119	GSE7890	Primary cultures of fibroblasts from_x000D_ normal scar (no hydrocortisone)	Fibroblast	stroma	not kept	not kept	not kept	stroma
GSM194120	GSE7890	Primary cultures of fibroblasts from_x000D_ normal scar (no hydrocortisone)	Fibroblast	stroma	not kept	not kept	not kept	stroma
GSM194121	GSE7890	Primary cultures of fibroblasts from_x000D_ normal scar (no hydrocortisone)	Fibroblast	stroma	not kept	not kept	not kept	stroma
GSM194122	GSE7890	Primary cultures of fibroblasts from_x000D_ normal scar (no hydrocortisone)	Fibroblast	stroma	not kept	not kept	not kept	stroma
GSM130277	GSE5579	Lymphatic endothelial cells	Lymphatics	stroma	not kept	not kept	not kept	stroma
GSM130278	GSE5579	Lymphatic endothelial cells under hypoxia	Lymphatics	stroma	not kept	not kept	not kept	stroma
GSM130280	GSE5579	Lymphatic endothelial cells with_x000D_ conditioned medium from NSCLC	Lymphatics	stroma	not kept	not kept	not kept	stroma
GSM130281	GSE5579	Lymphatic endothelial cells with_x000D_ conditioned medium from NSCLC	Lymphatics	stroma	not kept	not kept	not kept	stroma
GSM410697	GSE16356	Primary cultures from Dermal_x000D_ Lymphatic Endothelial Cells + empty siRNA	Lymphatics	stroma	not kept	not kept	not kept	stroma
GSM410698	GSE16356	Primary cultures from Dermal_x000D_ Lymphatic Endothelial Cells + empty siRNA	Lymphatics	stroma	not kept	not kept	not kept	stroma
GSM410666	GSE16354	Primary cultures from Dermal_x000D_ Lymphatic Endothelial Cells	Lymphatics	stroma	not kept	not kept	not kept	stroma
GSM410667	GSE16354	Primary cultures from Dermal_x000D_ Lymphatic Endothelial Cells	Lymphatics	stroma	not kept	not kept	not kept	stroma
GSM410668	GSE16354	Primary cultures from Dermal_x000D_ Lymphatic Endothelial Cells	Lymphatics	stroma	not kept	not kept	not kept	stroma
GSM410669	GSE16354	Primary cultures from Dermal_x000D_ Lymphatic Endothelial Cells	Lymphatics	stroma	not kept	not kept	not kept	stroma
GSM410670	GSE16354	Primary cultures from Dermal_x000D_ Lymphatic Endothelial Cells	Lymphatics	stroma	not kept	not kept	not kept	stroma
GSM410671	GSE16354	Primary cultures from Dermal_x000D_ Lymphatic Endothelial Cells	Lymphatics	stroma	not kept	not kept	not kept	stroma
GSM1027248	GSE41909	CD3+ CD8+	CD8 T cells	Lymphoids	Tcells	CD8	not kept	CD8
GSM1027249	GSE41909	CD3+ CD8+	CD8 T cells	Lymphoids	Tcells	CD8	not kept	CD8
GSM1027250	GSE41909	CD3+ CD8+ CD45RO+	CD8 T cells	Lymphoids	Tcells	CD8	not kept	CD8
GSM1027251	GSE41909	CD3+ CD8+ CD45RO+	CD8 T cells	Lymphoids	Tcells	CD8	not kept	CD8
GSM1027252	GSE41909	CD3+ CD8+ CD45RO+	CD8 T cells	Lymphoids	Tcells	CD8	not kept	CD8
GSM1027253	GSE41909	CD3+ CD8+ aCD3 aCD28 IL7 IL15 for 15days	CD8 T cells	Lymphoids	Tcells	CD8	not kept	CD8
GSM1027254	GSE41909	CD3+ CD8+ aCD3 aCD28 IL7 IL15 for 15days	CD8 T cells	Lymphoids	Tcells	CD8	not kept	CD8
GSM1027255	GSE41909	CD3+ CD8+ aCD3 aCD28 IL7 IL15 for 15days	CD8 T cells	Lymphoids	Tcells	CD8	not kept	CD8
GSM1027256	GSE41909	CD3+ CD8+ CD45RO+ aCD3 aCD28 IL7 IL15 for 15days	CD8 T cells	Lymphoids	Tcells	CD8	not kept	CD8
GSM1027257	GSE41909	CD3+ CD8+ CD45RO+ aCD3 aCD28 IL7 IL15 for 15days	CD8 T cells	Lymphoids	Tcells	CD8	not kept	CD8
GSM1027258	GSE41909	CD3+ CD8+ CD45RO+ aCD3 aCD28 IL7 IL15 for 15days	CD8 T cells	Lymphoids	Tcells	CD8	not kept	CD8
GSM1045312	GSE42569	From Peripheral Blood CD4+ CD45RA+ CD45RO- CD25- CD127+ Stimulation with aCD3 and aCD28 and IL-1beta, IL-6, IL-21, IL-23 and TGF-beta1	CD4 T cells	lymphoids	Tcells	CD4	not kept	CD4
GSM1045313	GSE42569	From Peripheral Blood CD4+ CD45RA+ CD45RO- CD25- CD127+ Stimulation with aCD3 and aCD28 and IL-1beta, IL-6, IL-21, IL-23 and TGF-beta1 in High salt conditions	CD4 T cells	lymphoids	Tcells	CD4	not kept	CD4
GSM1045314	GSE42569	From Peripheral Blood CD4+ CD45RA+ CD45RO- CD25- CD127+ Stimulation with aCD3 and aCD28 and IL-1beta, IL-6, IL-21, IL-23 and TGF-beta2	CD4 T cells	lymphoids	Tcells	CD4	not kept	CD4
GSM1045315	GSE42569	From Peripheral Blood CD4+ CD45RA+ CD45RO- CD25- CD127+ Stimulation with aCD3 and aCD28 and IL-1beta, IL-6, IL-21, IL-23 and TGF-beta1 in High salt conditions	CD4 T cells	lymphoids	Tcells	CD4	not kept	CD4
GSM1057943	GSE43177	From Peripheral Blood	T cells	lymphoids	Tcells	not kept	not kept	Tcells
GSM1057944	GSE43177	From Peripheral Blood	T cells	lymphoids	Tcells	not kept	not kept	Tcells
GSM1057945	GSE43177	From Peripheral Blood	T cells	lymphoids	Tcells	not kept	not kept	Tcells
GSM1057946	GSE43177	From Peripheral Blood	T cells	lymphoids	Tcells	not kept	not kept	Tcells
GSM1057947	GSE43177	From Peripheral Blood	T cells	lymphoids	Tcells	not kept	not kept	Tcells
GSM1057948	GSE43177	From Peripheral Blood	T cells	lymphoids	Tcells	not kept	not kept	Tcells
GSM1057949	GSE43177	From Peripheral Blood	T cells	lymphoids	Tcells	not kept	not kept	Tcells
GSM1057950	GSE43177	From Peripheral Blood	T cells	lymphoids	Tcells	not kept	not kept	Tcells
GSM1057951	GSE43177	From Peripheral Blood	T cells	lymphoids	Tcells	not kept	not kept	Tcells
GSM1057952	GSE43177	From Peripheral Blood	T cells	lymphoids	Tcells	not kept	not kept	Tcells
GSM1057953	GSE43177	From Peripheral Blood	T cells	lymphoids	Tcells	not kept	not kept	Tcells
GSM1057954	GSE43177	From Peripheral Blood	T cells	lymphoids	Tcells	not kept	not kept	Tcells
GSM1057955	GSE43177	From Peripheral Blood	T cells	lymphoids	Tcells	not kept	not kept	Tcells
GSM1057956	GSE43177	From Peripheral Blood	T cells	lymphoids	Tcells	not kept	not kept	Tcells
GSM1057957	GSE43177	From Peripheral Blood	T cells	lymphoids	Tcells	not kept	not kept	Tcells
GSM1057958	GSE43177	From Peripheral Blood	T cells	lymphoids	Tcells	not kept	not kept	Tcells
GSM1057959	GSE43177	From Peripheral Blood	T cells	lymphoids	Tcells	not kept	not kept	Tcells
GSM1057960	GSE43177	From Peripheral Blood	T cells	lymphoids	Tcells	not kept	not kept	Tcells
GSM1057961	GSE43177	From Peripheral Blood	T cells	lymphoids	Tcells	not kept	not kept	Tcells
GSM1108139	GSE45535	From Peripheral Blood CD19+ CD20+	B cells	lymphoids	Bcells	not kept	not kept	Bcells
GSM1108142	GSE45535	From Peripheral Blood CD38+ CD27+	Plasma cells	lymphoids	PlasmaCells	not kept	not kept	PlasmaCells
GSM1108143	GSE45535	From Peripheral Blood CD3+	T cells	lymphoids	Tcells	not kept	not kept	Tcells
GSM1108145	GSE45535	From Peripheral Blood CD19+ CD20+	B cells	lymphoids	Bcells	not kept	not kept	Bcells
GSM1108148	GSE45535	From Peripheral Blood CD38+ CD27+	Plasma cells	lymphoids	PlasmaCells	not kept	not kept	PlasmaCells
GSM1108149	GSE45535	From Peripheral Blood CD3+	T cells	lymphoids	Tcells	not kept	not kept	Tcells
GSM1215107	GSE50175	From Peripheral Blood.CD4+.CD45RA-.CXCR3+.CCR4-.CCR6-.Stimulated with immobilized CD3 and soluble CD28 Abs for 3 days	Th1	lymphoids	Tcells	CD4	not kept	CD4
GSM1215108	GSE50175	From Peripheral Blood.CD4+.CD45RA-.CXCR3+.CCR4-.CCR6+.Stimulated with immobilized CD3 and soluble CD28 Abs for 3 days	Th1Th17	lymphoids	Tcells	CD4	not kept	CD4
GSM1215109	GSE50175	From Peripheral Blood.CD4+.CD45RA-.CXCR3+.CCR4-.CCR6-.Stimulated with immobilized CD3 and soluble CD28 Abs for 3 days	Th1	lymphoids	Tcells	CD4	not kept	CD4
GSM1215110	GSE50175	From Peripheral Blood.CD4+.CD45RA-.CXCR3+.CCR4-.CCR6+.Stimulated with immobilized CD3 and soluble CD28 Abs for 3 days	Th1Th17	lymphoids	Tcells	CD4	not kept	CD4
GSM1215111	GSE50175	From Peripheral Blood.CD4+.CD45RA-.CXCR3+.CCR4-.CCR6-.Stimulated with immobilized CD3 and soluble CD28 Abs for 3 days	Th1	lymphoids	Tcells	CD4	not kept	CD4
GSM1215112	GSE50175	From Peripheral Blood.CD4+.CD45RA-.CXCR3+.CCR4-.CCR6+.Stimulated with immobilized CD3 and soluble CD28 Abs for 3 days	Th1Th17	lymphoids	Tcells	CD4	not kept	CD4
GSM1215113	GSE50175	From Peripheral Blood.CD4+.CD45RA-.CXCR3+.CCR4-.CCR6-.Stimulated with immobilized CD3 and soluble CD28 Abs for 3 days	Th1	lymphoids	Tcells	CD4	not kept	CD4
GSM1215114	GSE50175	From Peripheral Blood.CD4+.CD45RA-.CXCR3+.CCR4-.CCR6+.Stimulated with immobilized CD3 and soluble CD28 Abs for 3 days	Th1Th17	lymphoids	Tcells	CD4	not kept	CD4
GSM1247614	GSE51540	CD4+ IL-17+ Control	Th17	lymphoids	Tcells	CD4	not kept	CD4
GSM1247615	GSE51540	CD4+ IL-17+ Traited by Adalimumab (aTNFalpha)	Th17	lymphoids	Tcells	CD4	not kept	CD4
GSM257664	GSE11430	CD14+	Monocytes	myeloid	not kept	not kept	not kept	myeloid
GSM257666	GSE11430	CD14+	Monocytes	myeloid	not kept	not kept	not kept	myeloid
GSM257668	GSE11430	CD14+	Monocytes	myeloid	not kept	not kept	not kept	myeloid
GSM257670	GSE11430	CD14+	Monocytes	myeloid	not kept	not kept	not kept	myeloid
GSM257672	GSE11430	CD14+	Monocytes	myeloid	not kept	not kept	not kept	myeloid
GSM257665	GSE11430	CD14+ then 6 days with 10ng/ml MCSF	Macrophages	myeloid	not kept	not kept	not kept	myeloid
GSM257667	GSE11430	CD14+ then 6 days with 10ng/ml MCSF	Macrophages	myeloid	not kept	not kept	not kept	myeloid
GSM257669	GSE11430	CD14+ then 6 days with 10ng/ml MCSF	Macrophages	myeloid	not kept	not kept	not kept	myeloid
GSM257671	GSE11430	CD14+ then 6 days with 10ng/ml MCSF	Macrophages	myeloid	not kept	not kept	not kept	myeloid
GSM257673	GSE11430	CD14+ then 6 days with 10ng/ml MCSF	Macrophages	myeloid	not kept	not kept	not kept	myeloid
GSM514669	GSE20484	CD14+, 100ng/ml rhMCSF 6 days	Macrophages	myeloid	not kept	not kept	not kept	myeloid
GSM514670	GSE20484	CD14+, 100ng/ml rhMCSF 6 days	Macrophages	myeloid	not kept	not kept	not kept	myeloid
GSM514671	GSE20484	CD14+, 1µM rhCXCL4 6 days	Macrophages	myeloid	not kept	not kept	not kept	myeloid
GSM514672	GSE20484	CD14+, 1µM rhCXCL4 6 days	Macrophages	myeloid	not kept	not kept	not kept	myeloid
GSM183165	GSE7568	CD14+, MCSF GMCSF IL13 IL4	Macrophages	myeloid	not kept	not kept	not kept	myeloid
GSM183193	GSE7568	CD14+, MCSF GMCSF IL13 IL4	Macrophages	myeloid	not kept	not kept	not kept	myeloid
GSM183196	GSE7568	CD14+, MCSF GMCSF IL13 IL4	Macrophages	myeloid	not kept	not kept	not kept	myeloid
GSM183201	GSE7568	CD14+, MCSF GMCSF IL13 IL4	Macrophages	myeloid	not kept	not kept	not kept	myeloid
GSM183209	GSE7568	CD14+, MCSF GMCSF IL13 IL4	Macrophages	myeloid	not kept	not kept	not kept	myeloid
GSM183483	GSE7568	CD14+, MCSF GMCSF IL13 IL4 + TGFB	Macrophages	myeloid	not kept	not kept	not kept	myeloid
GSM183484	GSE7568	CD14+, MCSF GMCSF IL13 IL4 + TGFB	Macrophages	myeloid	not kept	not kept	not kept	myeloid
GSM183485	GSE7568	CD14+, MCSF GMCSF IL13 IL4 + TGFB	Macrophages	myeloid	not kept	not kept	not kept	myeloid
GSM183486	GSE7568	CD14+, MCSF GMCSF IL13 IL4 + TGFB	Macrophages	myeloid	not kept	not kept	not kept	myeloid
GSM183487	GSE7568	CD14+, MCSF GMCSF IL13 IL4 + TGFB	Macrophages	myeloid	not kept	not kept	not kept	myeloid
GSM1247616	GSE51540	CD4+ IL-17+ Control	Th17	lymphoids	Tcells	CD4	not kept	CD4
GSM1247617	GSE51540	CD4+ IL-17+ Traited by Adalimumab (aTNFalpha)	Th17	lymphoids	Tcells	CD4	not kept	CD4
GSM1247618	GSE51540	CD4+ IL-17+ Control	Th17	lymphoids	Tcells	CD4	not kept	CD4
GSM1247619	GSE51540	CD4+ IL-17+ Traited by Adalimumab (aTNFalpha)	Th17	lymphoids	Tcells	CD4	not kept	CD4
GSM214982	GSE8668	OptiPrep, OptiPrep, before Sports Exercises	Neutrophils	myeloid	not kept	not kept	not kept	myeloid
GSM214984	GSE8668	OptiPrep, OptiPrep, before Sports Exercises	Neutrophils	myeloid	not kept	not kept	not kept	myeloid
GSM214986	GSE8668	OptiPrep, OptiPrep, before Sports Exercises	Neutrophils	myeloid	not kept	not kept	not kept	myeloid
GSM214988	GSE8668	OptiPrep, OptiPrep, before Sports Exercises	Neutrophils	myeloid	not kept	not kept	not kept	myeloid
GSM214990	GSE8668	OptiPrep, OptiPrep, before Sports Exercises	Neutrophils	myeloid	not kept	not kept	not kept	myeloid
GSM214992	GSE8668	OptiPrep, OptiPrep, before Sports Exercises	Neutrophils	myeloid	not kept	not kept	not kept	myeloid
GSM214994	GSE8668	OptiPrep, OptiPrep, before Sports Exercises	Neutrophils	myeloid	not kept	not kept	not kept	myeloid
GSM214996	GSE8668	OptiPrep, OptiPrep, before Sports Exercises	Neutrophils	myeloid	not kept	not kept	not kept	myeloid
GSM214998	GSE8668	OptiPrep, OptiPrep, before Sports Exercises	Neutrophils	myeloid	not kept	not kept	not kept	myeloid
GSM215000	GSE8668	OptiPrep, OptiPrep, before Sports Exercises	Neutrophils	myeloid	not kept	not kept	not kept	myeloid
GSM215002	GSE8668	OptiPrep, OptiPrep, before Sports Exercises	Neutrophils	myeloid	not kept	not kept	not kept	myeloid
GSM215004	GSE8668	OptiPrep, OptiPrep, before Sports Exercises	Neutrophils	myeloid	not kept	not kept	not kept	myeloid
GSM214983	GSE8668	PBMC, OptiPrep, after Sports Exercises	Neutrophils	myeloid	not kept	not kept	not kept	myeloid
GSM214985	GSE8668	PBMC, OptiPrep, after Sports Exercises	Neutrophils	myeloid	not kept	not kept	not kept	myeloid
GSM214987	GSE8668	PBMC, OptiPrep, after Sports Exercises	Neutrophils	myeloid	not kept	not kept	not kept	myeloid
GSM214989	GSE8668	PBMC, OptiPrep, after Sports Exercises	Neutrophils	myeloid	not kept	not kept	not kept	myeloid
GSM214991	GSE8668	PBMC, OptiPrep, after Sports Exercises	Neutrophils	myeloid	not kept	not kept	not kept	myeloid
GSM214993	GSE8668	PBMC, OptiPrep, after Sports Exercises	Neutrophils	myeloid	not kept	not kept	not kept	myeloid
GSM214995	GSE8668	PBMC, OptiPrep, after Sports Exercises	Neutrophils	myeloid	not kept	not kept	not kept	myeloid
GSM214997	GSE8668	PBMC, OptiPrep, after Sports Exercises	Neutrophils	myeloid	not kept	not kept	not kept	myeloid
GSM214999	GSE8668	PBMC, OptiPrep, after Sports Exercises	Neutrophils	myeloid	not kept	not kept	not kept	myeloid
GSM215001	GSE8668	PBMC, OptiPrep, after Sports Exercises	Neutrophils	myeloid	not kept	not kept	not kept	myeloid
GSM215003	GSE8668	PBMC, OptiPrep, after Sports Exercises	Neutrophils	myeloid	not kept	not kept	not kept	myeloid
GSM215005	GSE8668	PBMC, OptiPrep, after Sports Exercises	Neutrophils	myeloid	not kept	not kept	not kept	myeloid
GSM1247620	GSE51540	CD4+ IL-17+ Control	Th17	lymphoids	Tcells	CD4	not kept	CD4
GSM1247621	GSE51540	CD4+ IL-17+ Traited by Adalimumab (aTNFalpha)	Th17	lymphoids	Tcells	CD4	not kept	CD4
GSM1247622	GSE51540	CD4+ IL-17+ Control	Th17	lymphoids	Tcells	CD4	not kept	CD4
GSM1247623	GSE51540	CD4+ IL-17+ Traited by Adalimumab (aTNFalpha)	Th17	lymphoids	Tcells	CD4	not kept	CD4
GSM1247624	GSE51540	CD4+ IL-17+ Control	Th17	lymphoids	Tcells	CD4	not kept	CD4
GSM1247625	GSE51540	CD4+ IL-17+ Traited by Adalimumab (aTNFalpha)	Th17	lymphoids	Tcells	CD4	not kept	CD4
GSM1247626	GSE51540	CD4+ IL-17+ Control	Th17	lymphoids	Tcells	CD4	not kept	CD4
GSM1247627	GSE51540	CD4+ IL-17+ Traited by Adalimumab (aTNFalpha)	Th17	lymphoids	Tcells	CD4	not kept	CD4
GSM1247628	GSE51540	CD4+ IL-17+ Control	Th17	lymphoids	Tcells	CD4	not kept	CD4
GSM1247629	GSE51540	CD4+ IL-17+ Traited by Adalimumab (aTNFalpha)	Th17	lymphoids	Tcells	CD4	not kept	CD4
GSM1247630	GSE51540	CD4+ IL-17+ Control	Th17	lymphoids	Tcells	CD4	not kept	CD4
GSM1247631	GSE51540	CD4+ IL-17+ Traited by Adalimumab (aTNFalpha)	Th17	lymphoids	Tcells	CD4	not kept	CD4
GSM146182	GSE6338	Depletion of B (CD19), NK (CD16), Monocytes (CD11b)._x000D_ Positive selection of CD4+ cells	CD4 T cells	Lymphoids	Tcells	CD4	not kept	CD4
GSM146183	GSE6338	Depletion of B (CD19), NK (CD16), Monocytes (CD11b)._x000D_ Positive selection of CD4+ cells	CD4 T cells	Lymphoids	Tcells	CD4	not kept	CD4
GSM146184	GSE6338	Depletion of B (CD19), NK (CD16), Monocytes (CD11b)._x000D_ Positive selection of CD4+ cells	CD4 T cells	Lymphoids	Tcells	CD4	not kept	CD4
GSM146185	GSE6338	Depletion of B (CD19), NK (CD16), Monocytes (CD11b)._x000D_ Positive selection of CD4+ cells	CD4 T cells	Lymphoids	Tcells	CD4	not kept	CD4
GSM146186	GSE6338	Depletion of B (CD19), NK (CD16), Monocytes (CD11b)._x000D_ Positive selection of CD4+ cells	CD4 T cells	Lymphoids	Tcells	CD4	not kept	CD4
GSM146187	GSE6338	Depletion of B (CD19), NK (CD16), Monocytes (CD11b)._x000D_ Positive selection of CD8+ cells	CD8 T cells	Lymphoids	Tcells	CD8	not kept	CD8
GSM146188	GSE6338	Depletion of B (CD19), NK (CD16), Monocytes (CD11b)._x000D_ Positive selection of CD8+ cells	CD8 T cells	Lymphoids	Tcells	CD8	not kept	CD8
GSM146189	GSE6338	Depletion of B (CD19), NK (CD16), Monocytes (CD11b)._x000D_ Positive selection of CD8+ cells	CD8 T cells	Lymphoids	Tcells	CD8	not kept	CD8
GSM146190	GSE6338	Depletion of B (CD19), NK (CD16), Monocytes (CD11b)._x000D_ Positive selection of CD8+ cells	CD8 T cells	Lymphoids	Tcells	CD8	not kept	CD8
GSM146191	GSE6338	Depletion of B (CD19), NK (CD16), Monocytes (CD11b)._x000D_ Positive selection of CD8+ cells	CD8 T cells	Lymphoids	Tcells	CD8	not kept	CD8
GSM146192	GSE6338	Depletion of B (CD19), NK (CD16), Monocytes (CD11b)._x000D_ Positive selection of HLA-DR+ cells	Activated T cells	Lymphoids	Tcells	not kept	not kept	Tcells
GSM146193	GSE6338	Depletion of B (CD19), NK (CD16), Monocytes (CD11b)._x000D_ Positive selection of HLA-DR+ cells	Activated T cells	Lymphoids	Tcells	not kept	not kept	Tcells
GSM146194	GSE6338	Depletion of B (CD19), NK (CD16), Monocytes (CD11b)._x000D_ Positive selection of HLA-DR+ cells	Activated T cells	Lymphoids	Tcells	not kept	not kept	Tcells
GSM146195	GSE6338	Depletion of B (CD19), NK (CD16), Monocytes (CD11b)._x000D_ Positive selection of HLA-DR+ cells	Activated T cells	Lymphoids	Tcells	not kept	not kept	Tcells
GSM146196	GSE6338	Depletion of B (CD19), NK (CD16), Monocytes (CD11b)._x000D_ Positive selection of HLA-DR+ cells	Activated T cells	Lymphoids	Tcells	not kept	not kept	Tcells
GSM146197	GSE6338	Depletion of B (CD19), NK (CD16), Monocytes (CD11b)._x000D_ Positive selection of HLA-DR- cells	Naive T cells	Lymphoids	Tcells	not kept	not kept	Tcells
GSM146198	GSE6338	Depletion of B (CD19), NK (CD16), Monocytes (CD11b)._x000D_ Positive selection of HLA-DR- cells	Naive T cells	Lymphoids	Tcells	not kept	not kept	Tcells
GSM146199	GSE6338	Depletion of B (CD19), NK (CD16), Monocytes (CD11b)._x000D_ Positive selection of HLA-DR- cells	Naive T cells	Lymphoids	Tcells	not kept	not kept	Tcells
GSM146200	GSE6338	Depletion of B (CD19), NK (CD16), Monocytes (CD11b)._x000D_ Positive selection of HLA-DR- cells	Naive T cells	Lymphoids	Tcells	not kept	not kept	Tcells
GSM146201	GSE6338	Depletion of B (CD19), NK (CD16), Monocytes (CD11b)._x000D_ Positive selection of HLA-DR- cells	Naive T cells	Lymphoids	Tcells	not kept	not kept	Tcells
GSM151864	GSE6566	From PBMC CD4+ CD45RA+ CD14- CCR7+low IL-7R+high Low DC Strenght	CD4 T cells	lymphoids	Tcells	CD4	not kept	CD4
GSM151865	GSE6566	From PBMC CD4+ CD45RA+ CD14- CCR7+low IL-7R+high High DC Strenght	CD4 T cells	lymphoids	Tcells	CD4	not kept	CD4
GSM151866	GSE6566	From PBMC CD4+ CD45RA+ CD14- CCR7+low IL-7R+high High DC Strenght	CD4 T cells	lymphoids	Tcells	CD4	not kept	CD4
GSM151867	GSE6566	From PBMC CD4+ CD45RA+ CD14- CCR7+low IL-7R+high Low DC Strenght	CD4 T cells	lymphoids	Tcells	CD4	not kept	CD4
GSM1869452	GSE72752	CD39+ CD8 T cells, patient 1	Exhausted CD8 T cells	lymphoids	Tcells	CD8	Exhausted	CD8
GSM1869453	GSE72752	CD39+ CD8 T cells, patient 6	Exhausted CD8 T cells	lymphoids	Tcells	CD8	Exhausted	CD8
GSM1869454	GSE72752	CD39+ CD8 T cells, patient 7	Exhausted CD8 T cells	lymphoids	Tcells	CD8	Exhausted	CD8
GSM1869455	GSE72752	CD39+ CD8 T cells, patient 8	Exhausted CD8 T cells	lymphoids	Tcells	CD8	Exhausted	CD8
GSM1869456	GSE72752	CD39+ CD8 T cells, patient 3	Exhausted CD8 T cells	lymphoids	Tcells	CD8	Exhausted	CD8
GSM1869457	GSE72752	CD39+ CD8 T cells, patient 4	Exhausted CD8 T cells	lymphoids	Tcells	CD8	Exhausted	CD8
GSM1869458	GSE72752	CD39+ CD8 T cells,patient 9	Exhausted CD8 T cells	lymphoids	Tcells	CD8	Exhausted	CD8
GSM1869459	GSE72752	CD39- CD8 T cells, patient 1	Non Exhausted CD8 T cells	lymphoids	Tcells	CD8	not kept	CD8
GSM1869460	GSE72752	CD39- CD8 T cells, patient 6	Non Exhausted CD8 T cells	lymphoids	Tcells	CD8	not kept	CD8
GSM1869461	GSE72752	CD39- CD8 T cells,patient 7	Non Exhausted CD8 T cells	lymphoids	Tcells	CD8	not kept	CD8
GSM1869462	GSE72752	CD39- CD8 T cells, patient 2	Non Exhausted CD8 T cells	lymphoids	Tcells	CD8	not kept	CD8
GSM1869463	GSE72752	CD39- CD8 T cells, patient 3	Non Exhausted CD8 T cells	lymphoids	Tcells	CD8	not kept	CD8
GSM1869464	GSE72752	CD39- CD8 T cells, patient 4	Non Exhausted CD8 T cells	lymphoids	Tcells	CD8	not kept	CD8
GSM1869465	GSE72752	CD39- CD8 T cells,patient 9	Non Exhausted CD8 T cells	lymphoids	Tcells	CD8	not kept	CD8
GSM1869466	GSE72752	CD39- CD8 T cells,patient 5	Non Exhausted CD8 T cells	lymphoids	Tcells	CD8	not kept	CD8
GSM198942	GSE8059	CD56+ CD16+ CD3-	NK cells	Lymphoids	Nkcells	not kept	not kept	Nkcells
GSM198943	GSE8059	CD56+ CD16+ CD3- + IL2 100 IU/ml 2h	NK cells	Lymphoids	Nkcells	not kept	not kept	Nkcells
GSM198944	GSE8059	CD56+ CD16+ CD3- + IL2 100 IU/ml 8h	NK cells	Lymphoids	Nkcells	not kept	not kept	Nkcells
GSM198945	GSE8059	CD56+ CD16+ CD3- + IL2 100 IU/ml 24h	NK cells	Lymphoids	Nkcells	not kept	not kept	Nkcells
GSM266963	GSE10586	PBMC CD4+ CD25high CD8- CD14- CD32- CD116-	Canonical CD4 Treg cells	Lymphoids	Tcells	CD4	not kept	CD4
GSM266964	GSE10586	PBMC CD4+ CD25high CD8- CD14- CD32- CD116-	Canonical CD4 Treg cells	Lymphoids	Tcells	CD4	not kept	CD4
GSM266965	GSE10586	PBMC CD4+ CD25high CD8- CD14- CD32- CD116-	Canonical CD4 Treg cells	Lymphoids	Tcells	CD4	not kept	CD4
GSM266966	GSE10586	PBMC CD4+ CD25high CD8- CD14- CD32- CD116-	Canonical CD4 Treg cells	Lymphoids	Tcells	CD4	not kept	CD4
GSM266967	GSE10586	PBMC CD4+ CD25high CD8- CD14- CD32- CD116-	Canonical CD4 Treg cells	Lymphoids	Tcells	CD4	not kept	CD4
GSM266968	GSE10586	PBMC CD4+ CD25high CD8- CD14- CD32- CD116-	Canonical CD4 Treg cells	Lymphoids	Tcells	CD4	not kept	CD4
GSM266969	GSE10586	PBMC CD4+ CD25high CD8- CD14- CD32- CD116-	Canonical CD4 Treg cells	Lymphoids	Tcells	CD4	not kept	CD4
GSM266970	GSE10586	PBMC CD4+ CD25high CD8- CD14- CD32- CD116-	Canonical CD4 Treg cells	Lymphoids	Tcells	CD4	not kept	CD4
GSM266971	GSE10586	PBMC CD4+ CD25high CD8- CD14- CD32- CD116-	Canonical CD4 Treg cells	Lymphoids	Tcells	CD4	not kept	CD4
GSM266972	GSE10586	PBMC CD4+ CD25high CD8- CD14- CD32- CD116-	Canonical CD4 Treg cells	Lymphoids	Tcells	CD4	not kept	CD4
GSM266973	GSE10586	PBMC CD4+ CD25high CD8- CD14- CD32- CD116-	Canonical CD4 Treg cells	Lymphoids	Tcells	CD4	not kept	CD4
GSM266974	GSE10586	PBMC CD4+ CD25high CD8- CD14- CD32- CD116-	Canonical CD4 Treg cells	Lymphoids	Tcells	CD4	not kept	CD4
GSM266975	GSE10586	PBMC CD4+ CD25high CD8- CD14- CD32- CD116-	Canonical CD4 Treg cells	Lymphoids	Tcells	CD4	not kept	CD4
GSM266976	GSE10586	PBMC CD4+ CD25high CD8- CD14- CD32- CD116-	Canonical CD4 Treg cells	Lymphoids	Tcells	CD4	not kept	CD4
GSM266977	GSE10586	PBMC CD4+ CD25high CD8- CD14- CD32- CD116-	Canonical CD4 Treg cells	Lymphoids	Tcells	CD4	not kept	CD4
GSM279572	GSE11057	CD4+ CD45RO+ CCR7+ CD62L+	Central Memory CD4 T cells	Lymphoids	Tcells	CD4	not kept	CD4
GSM279573	GSE11057	CD4+ CD45RO+ CCR7+ CD62L+	Central Memory CD4 T cells	Lymphoids	Tcells	CD4	not kept	CD4
GSM279574	GSE11057	CD4+ CD45RO+ CCR7+ CD62L+	Central Memory CD4 T cells	Lymphoids	Tcells	CD4	not kept	CD4
GSM279575	GSE11057	CD4+ CD45RO+ CCR7+ CD62L+	Central Memory CD4 T cells	Lymphoids	Tcells	CD4	not kept	CD4
GSM279576	GSE11057	CD4+ CD45RO+ CCR7+ CD62L+	Central Memory CD4 T cells	Lymphoids	Tcells	CD4	not kept	CD4
GSM279577	GSE11057	CD4+ CD45RO+ CCR7-	Effector Memory T cells	Lymphoids	Tcells	not kept	not kept	Tcells
GSM279578	GSE11057	CD4+ CD45RO+ CCR7-	Effector Memory T cells	Lymphoids	Tcells	not kept	not kept	Tcells
GSM279579	GSE11057	CD4+ CD45RO+ CCR7-	Effector Memory T cells	Lymphoids	Tcells	not kept	not kept	Tcells
GSM279580	GSE11057	CD4+ CD45RO+ CCR7-	Effector Memory T cells	Lymphoids	Tcells	not kept	not kept	Tcells
GSM279581	GSE11057	CD4+ CD45RA+ CCR7+ CD62L+	Naive CD4 T cells	Lymphoids	Tcells	CD4	not kept	CD4
GSM279582	GSE11057	CD4+ CD45RA+ CCR7+ CD62L+	Naive CD4 T cells	Lymphoids	Tcells	CD4	not kept	CD4
GSM279583	GSE11057	CD4+ CD45RA+ CCR7+ CD62L+	Naive CD4 T cells	Lymphoids	Tcells	CD4	not kept	CD4
GSM279584	GSE11057	CD4+ CD45RA+ CCR7+ CD62L+	Naive CD4 T cells	Lymphoids	Tcells	CD4	not kept	CD4
GSM285027	GSE11292	CD4+ CD25hi + aCD3 a CD28 IL2 t(min) = 0	Canonical CD4 Treg cells	Lymphoids	Tcells	CD4	not kept	CD4
GSM285028	GSE11292	CD4+ CD25hi + aCD3 a CD28 IL2 t(min) = 20	Canonical CD4 Treg cells	Lymphoids	Tcells	CD4	not kept	CD4
GSM285029	GSE11292	CD4+ CD25hi + aCD3 a CD28 IL2 t(min) = 40	Canonical CD4 Treg cells	Lymphoids	Tcells	CD4	not kept	CD4
GSM285030	GSE11292	CD4+ CD25hi + aCD3 a CD28 IL2 t(min) = 60	Canonical CD4 Treg cells	Lymphoids	Tcells	CD4	not kept	CD4
GSM285031	GSE11292	CD4+ CD25hi + aCD3 a CD28 IL2 t(min) = 80	Canonical CD4 Treg cells	Lymphoids	Tcells	CD4	not kept	CD4
GSM285032	GSE11292	CD4+ CD25hi + aCD3 a CD28 IL2 t(min) = 100	Canonical CD4 Treg cells	Lymphoids	Tcells	CD4	not kept	CD4
GSM285033	GSE11292	CD4+ CD25hi + aCD3 a CD28 IL2 t(min) = 140	Canonical CD4 Treg cells	Lymphoids	Tcells	CD4	not kept	CD4
GSM285034	GSE11292	CD4+ CD25hi + aCD3 a CD28 IL2 t(min) = 160	Canonical CD4 Treg cells	Lymphoids	Tcells	CD4	not kept	CD4
GSM285035	GSE11292	CD4+ CD25hi + aCD3 a CD28 IL2 t(min) = 180	Canonical CD4 Treg cells	Lymphoids	Tcells	CD4	not kept	CD4
GSM285036	GSE11292	CD4+ CD25hi + aCD3 a CD28 IL2 t(min) = 200	Canonical CD4 Treg cells	Lymphoids	Tcells	CD4	not kept	CD4
GSM285037	GSE11292	CD4+ CD25hi + aCD3 a CD28 IL2 t(min) = 220	Canonical CD4 Treg cells	Lymphoids	Tcells	CD4	not kept	CD4
GSM285038	GSE11292	CD4+ CD25hi + aCD3 a CD28 IL2 t(min) = 240	Canonical CD4 Treg cells	Lymphoids	Tcells	CD4	not kept	CD4
GSM285039	GSE11292	CD4+ CD25hi + aCD3 a CD28 IL2 t(min) = 260	Canonical CD4 Treg cells	Lymphoids	Tcells	CD4	not kept	CD4
GSM285040	GSE11292	CD4+ CD25hi + aCD3 a CD28 IL2 t(min) = 280	Canonical CD4 Treg cells	Lymphoids	Tcells	CD4	not kept	CD4
GSM285041	GSE11292	CD4+ CD25hi + aCD3 a CD28 IL2 t(min) = 300	Canonical CD4 Treg cells	Lymphoids	Tcells	CD4	not kept	CD4
GSM285042	GSE11292	CD4+ CD25hi + aCD3 a CD28 IL2 t(min) = 320	Canonical CD4 Treg cells	Lymphoids	Tcells	CD4	not kept	CD4
GSM285043	GSE11292	CD4+ CD25hi + aCD3 a CD28 IL2 t(min) = 340	Canonical CD4 Treg cells	Lymphoids	Tcells	CD4	not kept	CD4
GSM285044	GSE11292	CD4+ CD25hi + aCD3 a CD28 IL2 t(min) = 360	Canonical CD4 Treg cells	Lymphoids	Tcells	CD4	not kept	CD4
GSM306875	GSE12195	Laser microdissection followed by CD77+ (centroblasts)	Germinal center B cells	Lymphoids	Bcells	not kept	not kept	Bcells
GSM306876	GSE12195	Laser microdissection followed by CD77+ (centroblasts)	Germinal center B cells	Lymphoids	Bcells	not kept	not kept	Bcells
GSM306877	GSE12195	Laser microdissection followed by CD77+ (centroblasts)	Germinal center B cells	Lymphoids	Bcells	not kept	not kept	Bcells
GSM306878	GSE12195	Laser microdissection followed by CD77+ (centroblasts)	Germinal center B cells	Lymphoids	Bcells	not kept	not kept	Bcells
GSM306879	GSE12195	Laser microdissection followed by CD77+ (centroblasts)	Germinal center B cells	Lymphoids	Bcells	not kept	not kept	Bcells
GSM306880	GSE12195	Laser microdissection followed by CD19+ (centrocytes)	Germinal center B cells	Lymphoids	Bcells	not kept	not kept	Bcells
GSM306881	GSE12195	Laser microdissection followed by CD19+ (centrocytes)	Germinal center B cells	Lymphoids	Bcells	not kept	not kept	Bcells
GSM306882	GSE12195	Laser microdissection followed by CD19+ (centrocytes)	Germinal center B cells	Lymphoids	Bcells	not kept	not kept	Bcells
GSM306883	GSE12195	Laser microdissection followed by CD19+ (centrocytes)	Germinal center B cells	Lymphoids	Bcells	not kept	not kept	Bcells
GSM306884	GSE12195	Laser microdissection followed by CD19+ (centrocytes)	Germinal center B cells	Lymphoids	Bcells	not kept	not kept	Bcells
GSM310429	GSE12366	NA - CD19+, ??	Germinal center B cells	Lymphoids	Bcells	not kept	not kept	Bcells
GSM310430	GSE12366	NA - CD19+, ??	Germinal center B cells	Lymphoids	Bcells	not kept	not kept	Bcells
GSM310431	GSE12366	NA - CD19+, ??	Germinal center B cells	Lymphoids	Bcells	not kept	not kept	Bcells
GSM310432	GSE12366	NA - CD19+, ??	Plasma cells	Lymphoids	PlasmaCells	not kept	not kept	PlasmaCells
GSM310433	GSE12366	NA - CD19+, ??	Plasma cells	Lymphoids	PlasmaCells	not kept	not kept	PlasmaCells
GSM310434	GSE12366	NA - CD19+, ??	Plasma cells	Lymphoids	PlasmaCells	not kept	not kept	PlasmaCells
GSM310435	GSE12366	CD19+, CD38- IgD+	Naive B cells	Lymphoids	Bcells	not kept	not kept	Bcells
GSM310436	GSE12366	CD19+, CD38- IgD+	Naive B cells	Lymphoids	Bcells	not kept	not kept	Bcells
GSM310437	GSE12366	CD19+, CD38- IgD+	Naive B cells	Lymphoids	Bcells	not kept	not kept	Bcells
GSM310438	GSE12366	CD19+, IgM+ IgD+ CD27+	Memory B cells	Lymphoids	Bcells	not kept	not kept	Bcells
GSM310439	GSE12366	CD19+, IgM+ IgD+ CD27+	Memory B cells	Lymphoids	Bcells	not kept	not kept	Bcells
GSM310440	GSE12366	CD19+, IgM+ IgD+ CD27+	Memory B cells	Lymphoids	Bcells	not kept	not kept	Bcells
GSM322864	GSE12875	From PBMC heparanized Blood. CD4+	CD4 T cells	lymphoids	Tcells	CD4	not kept	CD4
GSM322865	GSE12875	From PBMC heparanized Blood. CD4+ aCD28+aCD3	CD4 T cells	lymphoids	Tcells	CD4	not kept	CD4
GSM322866	GSE12875	From PBMC heparanized Blood. CD4+	CD4 T cells	lymphoids	Tcells	CD4	not kept	CD4
GSM322867	GSE12875	From PBMC heparanized Blood. CD4+ aCD28+aCD3	CD4 T cells	lymphoids	Tcells	CD4	not kept	CD4
GSM322868	GSE12875	From PBMC heparanized Blood. CD4+	CD4 T cells	lymphoids	Tcells	CD4	not kept	CD4
GSM322869	GSE12875	From PBMC heparanized Blood. CD4+ aCD28+aCD3	CD4 T cells	lymphoids	Tcells	CD4	not kept	CD4
GSM349848	GSE13906	NA - Article behind paywall	T gamma delta	Lymphoids	Tcells	Tgd	not kept	Tgd
GSM349849	GSE13906	NA - Article behind paywall	T gamma delta	Lymphoids	Tcells	Tgd	not kept	Tgd
GSM372721	GSE14924	CD4+ + negative selection by kit	CD4 T cells	Lymphoids	Tcells	CD4	not kept	CD4
GSM372722	GSE14924	CD4+ + negative selection by kit	CD4 T cells	Lymphoids	Tcells	CD4	not kept	CD4
GSM372724	GSE14924	CD4+ + negative selection by kit	CD4 T cells	Lymphoids	Tcells	CD4	not kept	CD4
GSM372725	GSE14924	CD4+ + negative selection by kit	CD4 T cells	Lymphoids	Tcells	CD4	not kept	CD4
GSM372726	GSE14924	CD4+ + negative selection by kit	CD4 T cells	Lymphoids	Tcells	CD4	not kept	CD4
GSM372727	GSE14924	CD4+ + negative selection by kit	CD4 T cells	Lymphoids	Tcells	CD4	not kept	CD4
GSM372728	GSE14924	CD4+ + negative selection by kit	CD4 T cells	Lymphoids	Tcells	CD4	not kept	CD4
GSM372729	GSE14924	CD4+ + negative selection by kit	CD4 T cells	Lymphoids	Tcells	CD4	not kept	CD4
GSM372731	GSE14924	CD8+ + negative selection by kit	CD8 T cells	Lymphoids	Tcells	CD8	not kept	CD8
GSM372732	GSE14924	CD8+ + negative selection by kit	CD8 T cells	Lymphoids	Tcells	CD8	not kept	CD8
GSM372733	GSE14924	CD8+ + negative selection by kit	CD8 T cells	Lymphoids	Tcells	CD8	not kept	CD8
GSM372734	GSE14924	CD8+ + negative selection by kit	CD8 T cells	Lymphoids	Tcells	CD8	not kept	CD8
GSM372735	GSE14924	CD8+ + negative selection by kit	CD8 T cells	Lymphoids	Tcells	CD8	not kept	CD8
GSM372736	GSE14924	CD8+ + negative selection by kit	CD8 T cells	Lymphoids	Tcells	CD8	not kept	CD8
GSM372737	GSE14924	CD8+ + negative selection by kit	CD8 T cells	Lymphoids	Tcells	CD8	not kept	CD8
GSM372738	GSE14924	CD8+ + negative selection by kit	CD8 T cells	Lymphoids	Tcells	CD8	not kept	CD8
GSM372739	GSE14924	CD8+ + negative selection by kit	CD8 T cells	Lymphoids	Tcells	CD8	not kept	CD8
GSM372740	GSE14924	CD8+ + negative selection by kit	CD8 T cells	Lymphoids	Tcells	CD8	not kept	CD8
GSM372741	GSE14924	CD8+ + negative selection by kit	CD8 T cells	Lymphoids	Tcells	CD8	not kept	CD8
GSM372800	GSE14926	CD4+ negative selection	CD4 T cells	Lymphoids	Tcells	CD4	not kept	CD4
GSM372801	GSE14926	CD4+ negative selection	CD4 T cells	Lymphoids	Tcells	CD4	not kept	CD4
GSM372803	GSE14926	CD4+ negative selection	CD4 T cells	Lymphoids	Tcells	CD4	not kept	CD4
GSM372804	GSE14926	CD4+ negative selection	CD4 T cells	Lymphoids	Tcells	CD4	not kept	CD4
GSM372805	GSE14926	CD4+ positive selection	CD4 T cells	Lymphoids	Tcells	CD4	not kept	CD4
GSM372806	GSE14926	CD4+ positive selection	CD4 T cells	Lymphoids	Tcells	CD4	not kept	CD4
GSM372807	GSE14926	CD4+ positive selection	CD4 T cells	Lymphoids	Tcells	CD4	not kept	CD4
GSM372809	GSE14926	CD8+ negative selection	CD8 T cells	Lymphoids	Tcells	CD8	not kept	CD8
GSM411223	GSE16386	CD14+ + 6h IL4	Alternatively Activated Macrophages	myeloid	not kept	not kept	not kept	CD4
GSM411224	GSE16386	CD14+ + 6h IL4	Alternatively Activated Macrophages	myeloid	not kept	not kept	not kept	CD4
GSM411227	GSE16386	CD14+ + 6h IL4	Alternatively Activated Macrophages	myeloid	not kept	not kept	not kept	CD4
GSM411228	GSE16386	CD14+ + 6h IL4	Alternatively Activated Macrophages	myeloid	not kept	not kept	not kept	CD4
GSM411225	GSE16386	CD14+ + 6h PPARg agonist + IL4	Alternatively Activated Macrophages	myeloid	not kept	not kept	not kept	CD4
GSM411226	GSE16386	CD14+ + 6h PPARg agonist + IL4	Alternatively Activated Macrophages	myeloid	not kept	not kept	not kept	CD4
GSM411229	GSE16386	CD14+ + 6h PPARg agonist + IL4	Alternatively Activated Macrophages	myeloid	not kept	not kept	not kept	CD4
GSM411230	GSE16386	CD14+ + 6h PPARg agonist + IL4	Alternatively Activated Macrophages	myeloid	not kept	not kept	not kept	CD4
GSM411183	GSE16385	CD14+	Monocytes	myeloid	not kept	not kept	not kept	CD4
GSM411184	GSE16385	CD14+ 4h in vitro	Macrophages	myeloid	not kept	not kept	not kept	CD4
GSM411185	GSE16385	CD14+ 4h in vitro + PPARg antagonist	Macrophages	myeloid	not kept	not kept	not kept	CD4
GSM411186	GSE16385	CD14+ + 4h IL4	Alternatively Activated Macrophages	myeloid	not kept	not kept	not kept	CD4
GSM411187	GSE16385	CD14+ + 4h IL4 + PPARg antagonist	Alternatively Activated Macrophages	myeloid	not kept	not kept	not kept	CD4
GSM411188	GSE16385	CD14+ + 4h IFNg TNFa	Activated Macrophages	myeloid	not kept	not kept	not kept	CD4
GSM411189	GSE16385	CD14+ + 4h IFNg TNFa + PPARg antagonist	Activated Macrophages	myeloid	not kept	not kept	not kept	CD4
GSM411190	GSE16385	CD14+ 12h in vitro	Macrophages	myeloid	not kept	not kept	not kept	CD4
GSM411191	GSE16385	CD14+ 12h in vitro + PPARg antagonist	Macrophages	myeloid	not kept	not kept	not kept	myeloid
GSM411192	GSE16385	CD14+ + 12h IL4	Alternatively Activated Macrophages	myeloid	not kept	not kept	not kept	myeloid
GSM411193	GSE16385	CD14+ + 12h IL4 + PPARg antagonist	Alternatively Activated Macrophages	myeloid	not kept	not kept	not kept	myeloid
GSM411194	GSE16385	CD14+ + 12h IFNg TNFa	Activated Macrophages	myeloid	not kept	not kept	not kept	myeloid
GSM411195	GSE16385	CD14+ + 12h IFNg TNFa + PPARg antagonist	Activated Macrophages	myeloid	not kept	not kept	not kept	myeloid
GSM411196	GSE16385	CD14+	Monocytes	myeloid	not kept	not kept	not kept	myeloid
GSM411197	GSE16385	CD14+ 12h in vitro	Macrophages	myeloid	not kept	not kept	not kept	myeloid
GSM411198	GSE16385	CD14+ 12h in vitro + PPARg antagonist	Macrophages	myeloid	not kept	not kept	not kept	myeloid
GSM411199	GSE16385	CD14+ + 12h IL4	Alternatively Activated Macrophages	myeloid	not kept	not kept	not kept	myeloid
GSM411200	GSE16385	CD14+ + 12h IL4 + PPARg antagonist	Alternatively Activated Macrophages	myeloid	not kept	not kept	not kept	myeloid
GSM411201	GSE16385	CD14+ + 12h IFNg TNFa	Activated Macrophages	myeloid	not kept	not kept	not kept	myeloid
GSM411202	GSE16385	CD14+ + 12h IFNg TNFa + PPARg antagonist	Activated Macrophages	myeloid	not kept	not kept	not kept	myeloid
GSM411203	GSE16385	CD14+ 24h in vitro	Macrophages	myeloid	not kept	not kept	not kept	myeloid
GSM411204	GSE16385	CD14+ 24h in vitro + PPARg antagonist	Macrophages	myeloid	not kept	not kept	not kept	myeloid
GSM411205	GSE16385	CD14+ + 24h IL4	Alternatively Activated Macrophages	myeloid	not kept	not kept	not kept	myeloid
GSM411206	GSE16385	CD14+ + 24h IL4 + PPARg antagonist	Alternatively Activated Macrophages	myeloid	not kept	not kept	not kept	myeloid
GSM411207	GSE16385	CD14+ + 24h IFNg TNFa	Activated Macrophages	myeloid	not kept	not kept	not kept	myeloid
GSM411208	GSE16385	CD14+ + 24h IFNg TNFa + PPARg antagonist	Activated Macrophages	myeloid	not kept	not kept	not kept	myeloid
GSM411209	GSE16385	CD14+ 12h in vitro	Macrophages	myeloid	not kept	not kept	not kept	myeloid
GSM411210	GSE16385	CD14+ 12h in vitro + PPARg antagonist	Macrophages	myeloid	not kept	not kept	not kept	myeloid
GSM411211	GSE16385	CD14+ + 12h IL4	Alternatively Activated Macrophages	myeloid	not kept	not kept	not kept	myeloid
GSM411212	GSE16385	CD14+ + 12h IL4 + PPARg antagonist	Alternatively Activated Macrophages	myeloid	not kept	not kept	not kept	myeloid
GSM411213	GSE16385	CD14+ + 12h IFNg TNFa	Activated Macrophages	myeloid	not kept	not kept	not kept	myeloid
GSM411214	GSE16385	CD14+ + 12h IFNg TNFa + PPARg antagonist	Activated Macrophages	myeloid	not kept	not kept	not kept	myeloid
GSM411215	GSE16385	CD14+ 72h in vitro	Macrophages	myeloid	not kept	not kept	not kept	myeloid
GSM411216	GSE16385	CD14+ 72h in vitro + PPARg antagonist	Macrophages	myeloid	not kept	not kept	not kept	myeloid
GSM411217	GSE16385	CD14+ + 72h IL4	Alternatively Activated Macrophages	myeloid	not kept	not kept	not kept	myeloid
GSM411218	GSE16385	CD14+ + 72h IL4 + PPARg antagonist	Alternatively Activated Macrophages	myeloid	not kept	not kept	not kept	myeloid
GSM411219	GSE16385	CD14+ + 72h IFNg TNFa	Activated Macrophages	myeloid	not kept	not kept	not kept	myeloid
GSM411220	GSE16385	CD14+ + 72h IFNg TNFa + PPARg antagonist	Activated Macrophages	myeloid	not kept	not kept	not kept	myeloid
GSM372810	GSE14926	CD8+ negative selection	CD8 T cells	Lymphoids	Tcells	CD8	not kept	CD8
GSM372811	GSE14926	CD8+ negative selection	CD8 T cells	Lymphoids	Tcells	CD8	not kept	CD8
GSM372812	GSE14926	CD8+ negative selection	CD8 T cells	Lymphoids	Tcells	CD8	not kept	CD8
GSM372813	GSE14926	CD8+ negative selection	CD8 T cells	Lymphoids	Tcells	CD8	not kept	CD8
GSM372814	GSE14926	CD8+ positive selection	CD8 T cells	Lymphoids	Tcells	CD8	not kept	CD8
GSM372815	GSE14926	CD8+ positive selection	CD8 T cells	Lymphoids	Tcells	CD8	not kept	CD8
GSM372816	GSE14926	CD8+ positive selection	CD8 T cells	Lymphoids	Tcells	CD8	not kept	CD8
GSM372817	GSE14926	CD8+ positive selection	CD8 T cells	Lymphoids	Tcells	CD8	not kept	CD8
GSM372818	GSE14926	CD8+ positive selection	CD8 T cells	Lymphoids	Tcells	CD8	not kept	CD8
GSM392071	GSE15659	CD25- CD45RA+ FoxP3- CD4+	CD4 T cells	Lymphoids	Tcells	CD4	not kept	CD4
GSM392072	GSE15659	CD25-/+ CD45RA- FoxP3- CD4+	CD4 T cells	Lymphoids	Tcells	CD4	not kept	CD4
GSM392073	GSE15659	CD45RA+ FoxP3low CD4+	Canonical CD4 Treg cells	Lymphoids	Tcells	CD4	not kept	CD4
GSM392074	GSE15659	CD45RA- FoxP3low CD4+	CD4 T cells	Lymphoids	Tcells	CD4	not kept	CD4
GSM392075	GSE15659	CD45RA- FoxP3high CD4+	Canonical CD4 Treg cells	Lymphoids	Tcells	CD4	not kept	CD4
GSM472023	GSE19069	CD3+ CD4+ CD28+	CD4 T cells	Lymphoids	Tcells	CD4	not kept	CD4
GSM472024	GSE19069	CD3+ CD4+ CD28+, 2h IL12	CD4 T cells	Lymphoids	Tcells	CD4	not kept	CD4
GSM472025	GSE19069	CD3+ CD4+ CD28+, 24h IL12	CD4 T cells	Lymphoids	Tcells	CD4	not kept	CD4
GSM472026	GSE19069	CD3+ CD4+ CD28+, 48h IL12	CD4 T cells	Lymphoids	Tcells	CD4	not kept	CD4
GSM472027	GSE19069	CD3+ CD4+ CD28+, 8h IL12	CD4 T cells	Lymphoids	Tcells	CD4	not kept	CD4
GSM472028	GSE19069	CD3+ CD8+ CD28+	CD8 T cells	Lymphoids	Tcells	CD8	not kept	CD8
GSM472029	GSE19069	CD3+ CD8+ CD28+, 2h IL12	CD8 T cells	Lymphoids	Tcells	CD8	not kept	CD8
GSM472030	GSE19069	CD3+ CD8+ CD28+, 24h IL12	CD8 T cells	Lymphoids	Tcells	CD8	not kept	CD8
GSM472031	GSE19069	CD3+ CD8+ CD28+, 48h IL12	CD8 T cells	Lymphoids	Tcells	CD8	not kept	CD8
GSM472032	GSE19069	CD3+ CD8+ CD28+, 8h IL12	CD8 T cells	Lymphoids	Tcells	CD8	not kept	CD8
GSM476258	GSE12195	From tonsil, IgD+ CD27-CD10-CD38-	Naive B cells	Lymphoids	Bcells	not kept	not kept	Bcells
GSM476259	GSE12195	From tonsil, IgD+ CD27-CD10-CD38-	Naive B cells	Lymphoids	Bcells	not kept	not kept	Bcells
GSM476260	GSE12195	From tonsil, IgD+ CD27-CD10-CD38-	Naive B cells	Lymphoids	Bcells	not kept	not kept	Bcells
GSM476261	GSE12195	From tonsil, IgD+ CD27-CD10-CD38-	Naive B cells	Lymphoids	Bcells	not kept	not kept	Bcells
GSM476262	GSE12195	From tonsil, IgD+ CD27-CD10-CD38-	Naive B cells	Lymphoids	Bcells	not kept	not kept	Bcells
GSM476263	GSE12195	From tonsil, CD27+ CD10-CD38-	Memory B cells	Lymphoids	Bcells	not kept	not kept	Bcells
GSM476264	GSE12195	From tonsil, CD27+ CD10-CD38-	Memory B cells	Lymphoids	Bcells	not kept	not kept	Bcells
GSM476265	GSE12195	From tonsil, CD27+ CD10-CD38-	Memory B cells	Lymphoids	Bcells	not kept	not kept	Bcells
GSM476266	GSE12195	From tonsil, CD27+ CD10-CD38-	Memory B cells	Lymphoids	Bcells	not kept	not kept	Bcells
GSM476267	GSE12195	From tonsil, CD27+ CD10-CD38-	Memory B cells	Lymphoids	Bcells	not kept	not kept	Bcells
GSM488972	GSE19599	From normal flow sorted bone marrow. CD34-.CD19+.CD10low.CD20++	Immature B cells	lymphoids	Bcells	not kept	not kept	Bcells
GSM488973	GSE19599	From normal flow sorted bone marrow. CD34-.CD19+.CD10low.CD20++	Immature B cells	lymphoids	Bcells	not kept	not kept	Bcells
GSM547998	GSE22045	CD25hi CD4+	Canonical CD4 Treg cells	Lymphoids	Tcells	CD4	not kept	CD4
GSM547999	GSE22045	CD25hi CD4+	Canonical CD4 Treg cells	Lymphoids	Tcells	CD4	not kept	CD4
GSM548000	GSE22045	CD4+CD45RA+	CD4 T cells	Lymphoids	Tcells	CD4	not kept	CD4
GSM548001	GSE22045	CD4+CD45RA+	CD4 T cells	Lymphoids	Tcells	CD4	not kept	CD4
GSM571720	GSE23293	From Peripheral Blood.CD4+.CD19-.	T cells	lymphoids	Tcells	not kept	not kept	Tcells
GSM571741	GSE23293	From Peripheral Blood.CD4+.CD19-.	T cells	lymphoids	Tcells	not kept	not kept	Tcells
GSM571742	GSE23293	From Peripheral Blood.CD4+.CD19-.	T cells	lymphoids	Tcells	not kept	not kept	Tcells
GSM571743	GSE23293	From Peripheral Blood.CD4+.CD19-.	T cells	lymphoids	Tcells	not kept	not kept	Tcells
GSM571745	GSE23293	From Peripheral Blood.CD4+.CD19-.	T cells	lymphoids	Tcells	not kept	not kept	Tcells
GSM571746	GSE23293	From Peripheral Blood.CD4+.CD19-.	T cells	lymphoids	Tcells	not kept	not kept	Tcells
GSM571747	GSE23293	From Peripheral Blood.CD4+.CD19-.	T cells	lymphoids	Tcells	not kept	not kept	Tcells
GSM571748	GSE23293	From Peripheral Blood.CD4+.CD19-.	T cells	lymphoids	Tcells	not kept	not kept	Tcells
GSM571749	GSE23293	From Peripheral Blood.CD4+.CD19-.	T cells	lymphoids	Tcells	not kept	not kept	Tcells
GSM571750	GSE23293	From Peripheral Blood.CD4+.CD19-.	T cells	lymphoids	Tcells	not kept	not kept	Tcells
GSM571751	GSE23293	From Peripheral Blood.CD4+.CD19-.	T cells	lymphoids	Tcells	not kept	not kept	Tcells
GSM571752	GSE23293	From Peripheral Blood.CD4+.CD19-.	T cells	lymphoids	Tcells	not kept	not kept	Tcells
GSM571753	GSE23293	From Peripheral Blood.CD4+.CD19-.	T cells	lymphoids	Tcells	not kept	not kept	Tcells
GSM571754	GSE23293	From Peripheral Blood.CD4+.CD19-.	T cells	lymphoids	Tcells	not kept	not kept	Tcells
GSM571758	GSE23294	From Peripheral Blood.CD4+.CD19-.	T cells	lymphoids	Tcells	not kept	not kept	Tcells
GSM571760	GSE23295	From Peripheral Blood.CD4+.CD19-.	T cells	lymphoids	Tcells	not kept	not kept	Tcells
GSM572657	GSE23332	CD4+CD25highCD127low/-	Canonical CD4 Treg cells	Lymphoids	Tcells	CD4	not kept	CD4
GSM705287	GSE28490	PBMC CD14+ kit	Monocytes	myeloid	not kept	not kept	not kept	Bcells
GSM705288	GSE28490	PBMC CD14+ kit	Monocytes	myeloid	not kept	not kept	not kept	Bcells
GSM705289	GSE28490	PBMC CD14+ kit	Monocytes	myeloid	not kept	not kept	not kept	Bcells
GSM705290	GSE28490	PBMC CD14+ kit	Monocytes	myeloid	not kept	not kept	not kept	Bcells
GSM705291	GSE28490	PBMC CD14+ kit	Monocytes	myeloid	not kept	not kept	not kept	Bcells
GSM705292	GSE28490	PBMC CD14+ kit	Monocytes	myeloid	not kept	not kept	not kept	Nkcells
GSM705293	GSE28490	PBMC CD14+ kit	Monocytes	myeloid	not kept	not kept	not kept	Nkcells
GSM705294	GSE28490	PBMC CD14+ kit	Monocytes	myeloid	not kept	not kept	not kept	Nkcells
GSM705295	GSE28490	PBMC CD14+ kit	Monocytes	myeloid	not kept	not kept	not kept	Nkcells
GSM705296	GSE28490	PBMC CD14+ kit	Monocytes	myeloid	not kept	not kept	not kept	Nkcells
GSM572658	GSE23332	CD4+CD25highCD127low/-	Canonical CD4 Treg cells	Lymphoids	Tcells	CD4	not kept	CD4
GSM572659	GSE23332	CD4+CD25highCD127low/-	Canonical CD4 Treg cells	Lymphoids	Tcells	CD4	not kept	CD4
GSM572660	GSE23332	CD4+CD25highCD127low/-	Canonical CD4 Treg cells	Lymphoids	Tcells	CD4	not kept	CD4
GSM572661	GSE23332	CD4+CD25highCD127low/-	Canonical CD4 Treg cells	Lymphoids	Tcells	CD4	not kept	CD4
GSM572662	GSE23332	CD4+CD25highCD127low/-	Canonical CD4 Treg cells	Lymphoids	Tcells	CD4	not kept	CD4
GSM616121	GSE25087	CD3+CD4+CD45RA+CCR7+CD27+	CD4 T cells	Lymphoids	Tcells	CD4	not kept	CD4
GSM616122	GSE25087	CD3+CD4+CD45RA+CCR7+CD27+	CD4 T cells	Lymphoids	Tcells	CD4	not kept	CD4
GSM616123	GSE25087	CD3+CD4+CD45RA+CCR7+CD27+	CD4 T cells	Lymphoids	Tcells	CD4	not kept	CD4
GSM616124	GSE25087	CD3+CD4+CD25bright	Canonical CD4 Treg cells	Lymphoids	Tcells	CD4	not kept	CD4
GSM616125	GSE25087	CD3+CD4+CD25bright	Canonical CD4 Treg cells	Lymphoids	Tcells	CD4	not kept	CD4
GSM616126	GSE25087	CD3+CD4+CD25bright	Canonical CD4 Treg cells	Lymphoids	Tcells	CD4	not kept	CD4
GSM651411	GSE26495	Naive CD8+ CD3+ T cells - rep1	Naive CD8 T cells	lymphoids	Tcells	CD8	Naive	CD8
GSM651412	GSE26495	Naive CD8+ CD3+ T cells - rep2	Naive CD8 T cells	lymphoids	Tcells	CD8	Naive	CD8
GSM651413	GSE26495	Naive CD8+ CD3+ T cells - rep3	Naive CD8 T cells	lymphoids	Tcells	CD8	Naive	CD8
GSM651415	GSE26495	Naive CD8+ CD3+ T cells - rep4	Naive CD8 T cells	lymphoids	Tcells	CD8	Naive	CD8
GSM705317	GSE28490	EasySep® Human Eosinophil_x000D_ Enrichment Kit (Stem Cell Technologies)	Eosinophils	myeloid	not kept	not kept	not kept	myeloid
GSM705318	GSE28490	EasySep® Human Eosinophil_x000D_ Enrichment Kit (Stem Cell Technologies)	Eosinophils	myeloid	not kept	not kept	not kept	myeloid
GSM705319	GSE28490	EasySep® Human Eosinophil_x000D_ Enrichment Kit (Stem Cell Technologies)	Eosinophils	myeloid	not kept	not kept	not kept	myeloid
GSM705320	GSE28490	EasySep® Human Eosinophil_x000D_ Enrichment Kit (Stem Cell Technologies)	Eosinophils	myeloid	not kept	not kept	not kept	myeloid
GSM705321	GSE28490	Human mDCs Enrichment Kit CD11c+	Myeloid Dendritic Cells	myeloid	not kept	not kept	not kept	myeloid
GSM705322	GSE28490	Human mDCs Enrichment Kit CD11c+	Myeloid Dendritic Cells	myeloid	not kept	not kept	not kept	myeloid
GSM705323	GSE28490	Human mDCs Enrichment Kit CD11c+	Myeloid Dendritic Cells	myeloid	not kept	not kept	not kept	myeloid
GSM705324	GSE28490	Human mDCs Enrichment Kit CD11c+	Myeloid Dendritic Cells	myeloid	not kept	not kept	not kept	myeloid
GSM705325	GSE28490	Human mDCs Enrichment Kit CD11c+	Myeloid Dendritic Cells	myeloid	not kept	not kept	not kept	myeloid
GSM705326	GSE28490	Human Neutrophil Enrichment Kit	Neutrophils	myeloid	not kept	not kept	not kept	myeloid
GSM705327	GSE28490	Human Neutrophil Enrichment Kit	Neutrophils	myeloid	not kept	not kept	not kept	myeloid
GSM705328	GSE28490	Human Neutrophil Enrichment Kit	Neutrophils	myeloid	not kept	not kept	not kept	myeloid
GSM705329	GSE28490	Human pDCs Enrichment Kit CD123+	Plasmacytoid Dendritic Cells	myeloid	not kept	not kept	not kept	myeloid
GSM705330	GSE28490	Human pDCs Enrichment Kit CD123+	Plasmacytoid Dendritic Cells	myeloid	not kept	not kept	not kept	myeloid
GSM705331	GSE28490	Human pDCs Enrichment Kit CD123+	Plasmacytoid Dendritic Cells	myeloid	not kept	not kept	not kept	myeloid
GSM705332	GSE28490	Human pDCs Enrichment Kit CD123+	Plasmacytoid Dendritic Cells	myeloid	not kept	not kept	not kept	myeloid
GSM705333	GSE28490	Human pDCs Enrichment Kit CD123+	Plasmacytoid Dendritic Cells	myeloid	not kept	not kept	not kept	myeloid
GSM651416	GSE26495	PD-1 high CD8+ CD3+ T cells - rep1	Exhausted CD8 T cells	lymphoids	Tcells	CD8	Exhausted	CD8
GSM651417	GSE26495	PD-1 high CD8+ CD3+ T cells - rep2	Exhausted CD8 T cells	lymphoids	Tcells	CD8	Exhausted	CD8
GSM651418	GSE26495	PD-1 high CD8+ CD3+ T cells - rep3	Exhausted CD8 T cells	lymphoids	Tcells	CD8	Exhausted	CD8
GSM651419	GSE26495	PD-1 high CD8+ CD3+ T cells - rep4	Exhausted CD8 T cells	lymphoids	Tcells	CD8	Exhausted	CD8
GSM651420	GSE26495	PD-1 high CD8+ CD3+ T cells - rep5	Exhausted CD8 T cells	lymphoids	Tcells	CD8	Exhausted	CD8
GSM705407	GSE28491	PBMC CD14+ kit	Monocytes	myeloid	not kept	not kept	not kept	myeloid
GSM705408	GSE28491	PBMC CD14+ kit	Monocytes	myeloid	not kept	not kept	not kept	myeloid
GSM705409	GSE28491	PBMC CD14+ kit	Monocytes	myeloid	not kept	not kept	not kept	myeloid
GSM705410	GSE28491	PBMC CD14+ kit	Monocytes	myeloid	not kept	not kept	not kept	myeloid
GSM705411	GSE28491	PBMC CD14+ kit	Monocytes	myeloid	not kept	not kept	not kept	myeloid
GSM651422	GSE26495	PD-1 high CD8+ CD3+ T cells - rep6	Exhausted CD8 T cells	lymphoids	Tcells	CD8	Exhausted	CD8
GSM651423	GSE26495	PD-1 low CD8+ CD3+ T cells - rep1	Non Exhausted CD8 T cells	lymphoids	Tcells	CD8	not kept	CD8
GSM651425	GSE26495	PD-1 low CD8+ CD3+ T cells - rep2	Non Exhausted CD8 T cells	lymphoids	Tcells	CD8	not kept	CD8
GSM651426	GSE26495	PD-1 low CD8+ CD3+ T cells - rep3	Non Exhausted CD8 T cells	lymphoids	Tcells	CD8	not kept	CD8
GSM651427	GSE26495	PD-1 low CD8+ CD3+ T cells - rep4	Non Exhausted CD8 T cells	lymphoids	Tcells	CD8	not kept	CD8
GSM651429	GSE26495	PD-1 low CD8+ CD3+ T cells - rep5	Non Exhausted CD8 T cells	lymphoids	Tcells	CD8	not kept	CD8
GSM651430	GSE26495	PD-1 low CD8+ CD3+ T cells - rep6	Non Exhausted CD8 T cells	lymphoids	Tcells	CD8	not kept	CD8
GSM658010	GSE26725	PBMC CD19+	B cells	Lymphoids	Bcells	not kept	not kept	Bcells
GSM658011	GSE26725	PBMC CD19+	B cells	Lymphoids	Bcells	not kept	not kept	Bcells
GSM705422	GSE28491	PBMC CD8+ kit	Eosinophils	myeloid	not kept	not kept	not kept	myeloid
GSM705423	GSE28491	PBMC CD8+ kit	Eosinophils	myeloid	not kept	not kept	not kept	myeloid
GSM705424	GSE28491	PBMC CD8+ kit	Eosinophils	myeloid	not kept	not kept	not kept	myeloid
GSM658012	GSE26725	PBMC CD19+	B cells	Lymphoids	Bcells	not kept	not kept	Bcells
GSM658013	GSE26725	PBMC CD19+	B cells	Lymphoids	Bcells	not kept	not kept	Bcells
GSM658014	GSE26725	PBMC CD19+	B cells	Lymphoids	Bcells	not kept	not kept	Bcells
GSM662182	GSE26890	CXCR1- human effector CD8+ T cells U13	Non Effector CD8 T cells	lymphoids	Tcells	CD8	not kept	CD8
GSM662183	GSE26890	CXCR1+ human effector CD8+ T cells U13	Effector CD8 T cells	lymphoids	Tcells	CD8	Effector	CD8
GSM705430	GSE28491	Human Neutrophil Enrichment Kit	Neutrophils	myeloid	not kept	not kept	not kept	myeloid
GSM705431	GSE28491	Human Neutrophil Enrichment Kit	Neutrophils	myeloid	not kept	not kept	not kept	myeloid
GSM705432	GSE28491	Human Neutrophil Enrichment Kit	Neutrophils	myeloid	not kept	not kept	not kept	myeloid
GSM705433	GSE28491	Human Neutrophil Enrichment Kit	Neutrophils	myeloid	not kept	not kept	not kept	myeloid
GSM705434	GSE28491	Human Neutrophil Enrichment Kit	Neutrophils	myeloid	not kept	not kept	not kept	myeloid
GSM662190	GSE26890	CXCR1- human effector CD8+ T cells U14	Non Effector CD8 T cells	lymphoids	Tcells	CD8	not kept	CD8
GSM662212	GSE26890	CXCR1+ human effector CD8+ T cells U14	Effector CD8 T cells	lymphoids	Tcells	CD8	Effector	CD8
GSM662213	GSE26890	CXCR1- human effector CD8+ T cells U25	Non Effector CD8 T cells	lymphoids	Tcells	CD8	not kept	CD8
GSM662214	GSE26890	CXCR1+ human effector CD8+ T cells U25	Effector CD8 T cells	lymphoids	Tcells	CD8	Effector	CD8
GSM662215	GSE26890	CXCR1- human effector CD8+ T cells U36	Non Effector CD8 T cells	lymphoids	Tcells	CD8	not kept	CD8
GSM662216	GSE26890	CXCR1+ human effector CD8+ T cells U36	Effector CD8 T cells	lymphoids	Tcells	CD8	Effector	CD8
GSM662217	GSE26890	CXCR1- human effector CD8+ T cells U46	Non Effector CD8 T cells	lymphoids	Tcells	CD8	not kept	CD8
GSM662218	GSE26890	CXCR1+ human effector CD8+ T cells U46	Effector CD8 T cells	lymphoids	Tcells	CD8	Effector	CD8
GSM663126	GSE26928	PBMC CD4+ CD45RA-CCR7+CXCR5-	Central Memory CD4 T cells	Lymphoids	Tcells	CD4	not kept	CD4
GSM663127	GSE26928	PBMC CD4+ CD45RA-CCR7-CXCR5+	CXCR5+ Memory CD4 T cells	Lymphoids	Tcells	CD4	not kept	CD4
GSM663128	GSE26928	PBMC CD4+ CD45RA-CCR7-CXCR5-	Effector Memory CD4 T cells	Lymphoids	Tcells	CD4	not kept	CD4
GSM663129	GSE26928	PBMC CD4+ CD45RA+CCR7+CXCR5-	Naive CD4 T cells	Lymphoids	Tcells	CD4	not kept	CD4
GSM663130	GSE26928	PBMC CD4+ CD45RA-CCR7+CXCR5-	Central Memory CD4 T cells	Lymphoids	Tcells	CD4	not kept	CD4
GSM663131	GSE26928	PBMC CD4+ CD45RA-CCR7-CXCR5+	CXCR5+ Memory CD4 T cells	Lymphoids	Tcells	CD4	not kept	CD4
GSM663132	GSE26928	PBMC CD4+ CD45RA-CCR7-CXCR5-	Effector Memory CD4 T cells	Lymphoids	Tcells	CD4	not kept	CD4
GSM663133	GSE26928	PBMC CD4+ CD45RA+CCR7+CXCR5-	Naive CD4 T cells	Lymphoids	Tcells	CD4	not kept	CD4
GSM674835	GSE27291	PBMC TCRVgamma9+	T gamma delta	Lymphoids	Tcells	Tgd	not kept	Tgd
GSM674836	GSE27291	PBMC TCRVgamma9+ + phosphoantigen BrHPP + IL-2 6h	T gamma delta	Lymphoids	Tcells	Tgd	not kept	Tgd
GSM674837	GSE27291	PBMC TCRVgamma9+ + phosphoantigen BrHPP + IL-2 7days	T gamma delta	Lymphoids	Tcells	Tgd	not kept	Tgd
GSM674838	GSE27291	PBMC TCRVgamma9+	T gamma delta	Lymphoids	Tcells	Tgd	not kept	Tgd
GSM674839	GSE27291	PBMC TCRVgamma9+ + phosphoantigen BrHPP + IL-2 6h	T gamma delta	Lymphoids	Tcells	Tgd	not kept	Tgd
GSM674840	GSE27291	PBMC TCRVgamma9+ + phosphoantigen BrHPP + IL-2 7days	T gamma delta	Lymphoids	Tcells	Tgd	not kept	Tgd
GSM674841	GSE27291	PBMC TCRVgamma9+	T gamma delta	Lymphoids	Tcells	Tgd	not kept	Tgd
GSM674842	GSE27291	PBMC TCRVgamma9+ + phosphoantigen BrHPP + IL-2 6h	T gamma delta	Lymphoids	Tcells	Tgd	not kept	Tgd
GSM674843	GSE27291	PBMC TCRVgamma9+ + phosphoantigen BrHPP + IL-2 7days	T gamma delta	Lymphoids	Tcells	Tgd	not kept	Tgd
GSM674844	GSE27291	PBMC TCRVgamma9+	T gamma delta	Lymphoids	Tcells	Tgd	not kept	Tgd
GSM674845	GSE27291	PBMC TCRVgamma9+ + phosphoantigen BrHPP + IL-2 6h	T gamma delta	Lymphoids	Tcells	Tgd	not kept	Tgd
GSM674846	GSE27291	PBMC TCRVgamma9+ + phosphoantigen BrHPP + IL-2 7days	T gamma delta	Lymphoids	Tcells	Tgd	not kept	Tgd
GSM687236	GSE27838	PBMC NK cell enrichment kit (Stem Cell Tech)	NK cells	Lymphoids	Nkcells	not kept	not kept	Nkcells
GSM687237	GSE27838	PBMC NK cell enrichment kit (Stem Cell Tech)	NK cells	Lymphoids	Nkcells	not kept	not kept	Nkcells
GSM687238	GSE27838	PBMC NK cell enrichment kit (Stem Cell Tech)	NK cells	Lymphoids	Nkcells	not kept	not kept	Nkcells
GSM687239	GSE27838	PBMC NK cell enrichment kit (Stem Cell Tech)	NK cells	Lymphoids	Nkcells	not kept	not kept	Nkcells
GSM687240	GSE27838	PBMC NK cell enrichment kit (Stem Cell Tech)	NK cells	Lymphoids	Nkcells	not kept	not kept	Nkcells
GSM687241	GSE27838	PBMC NK cell enrichment kit (Stem Cell Tech)	NK cells	Lymphoids	Nkcells	not kept	not kept	Nkcells
GSM687242	GSE27838	PBMC NK cell enrichment kit (Stem Cell Tech)	NK cells	Lymphoids	Nkcells	not kept	not kept	Nkcells
GSM687243	GSE27838	PBMC NK cell enrichment kit (Stem Cell Tech)	NK cells	Lymphoids	Nkcells	not kept	not kept	Nkcells
GSM687244	GSE27838	PBMC NK cell enrichment kit (Stem Cell Tech) + 10d IL2	NK cells	Lymphoids	Nkcells	not kept	not kept	Nkcells
GSM687245	GSE27838	PBMC NK cell enrichment kit (Stem Cell Tech) + 10d IL2	NK cells	Lymphoids	Nkcells	not kept	not kept	Nkcells
GSM687246	GSE27838	PBMC NK cell enrichment kit (Stem Cell Tech) + 10d IL2	NK cells	Lymphoids	Nkcells	not kept	not kept	Nkcells
GSM687247	GSE27838	PBMC NK cell enrichment kit (Stem Cell Tech) + 10d IL2	NK cells	Lymphoids	Nkcells	not kept	not kept	Nkcells
GSM687248	GSE27838	PBMC NK cell enrichment kit (Stem Cell Tech) + 10d IL2	NK cells	Lymphoids	Nkcells	not kept	not kept	Nkcells
GSM687249	GSE27838	PBMC NK cell enrichment kit (Stem Cell Tech) + 10d IL2	NK cells	Lymphoids	Nkcells	not kept	not kept	Nkcells
GSM687250	GSE27838	PBMC NK cell enrichment kit (Stem Cell Tech) + 10d IL2	NK cells	Lymphoids	Nkcells	not kept	not kept	Nkcells
GSM687251	GSE27838	PBMC NK cell enrichment kit (Stem Cell Tech) + 10d IL2	NK cells	Lymphoids	Nkcells	not kept	not kept	Nkcells
GSM705297	GSE28490	PBMC CD19+ kit	B cells	Lymphoids	Bcells	not kept	not kept	Bcells
GSM705298	GSE28490	PBMC CD19+ kit	B cells	Lymphoids	Bcells	not kept	not kept	Bcells
GSM705299	GSE28490	PBMC CD19+ kit	B cells	Lymphoids	Bcells	not kept	not kept	Bcells
GSM705300	GSE28490	PBMC CD19+ kit	B cells	Lymphoids	Bcells	not kept	not kept	Bcells
GSM705301	GSE28490	PBMC CD19+ kit	B cells	Lymphoids	Bcells	not kept	not kept	Bcells
GSM705307	GSE28490	PBMC CD56+ kit	NK cells	Lymphoids	Nkcells	not kept	not kept	Nkcells
GSM705308	GSE28490	PBMC CD56+ kit	NK cells	Lymphoids	Nkcells	not kept	not kept	Nkcells
GSM705309	GSE28490	PBMC CD56+ kit	NK cells	Lymphoids	Nkcells	not kept	not kept	Nkcells
GSM705310	GSE28490	PBMC CD56+ kit	NK cells	Lymphoids	Nkcells	not kept	not kept	Nkcells
GSM705311	GSE28490	PBMC CD56+ kit	NK cells	Lymphoids	Nkcells	not kept	not kept	Nkcells
GSM705312	GSE28490	PBMC CD8+ kit	CD8 T cells	Lymphoids	Tcells	CD8	not kept	CD8
GSM705313	GSE28490	PBMC CD8+ kit	CD8 T cells	Lymphoids	Tcells	CD8	not kept	CD8
GSM705314	GSE28490	PBMC CD8+ kit	CD8 T cells	Lymphoids	Tcells	CD8	not kept	CD8
GSM705315	GSE28490	PBMC CD8+ kit	CD8 T cells	Lymphoids	Tcells	CD8	not kept	CD8
GSM158184	GSE6863	PBMC CD14+ 100ng/mL IL4 + IL4 Normoxia	Myeloid Dendritic Cells	myeloid	not kept	not kept	not kept	myeloid
GSM158186	GSE6863	PBMC CD14+ 100ng/mL IL4 + IL4 Normoxia	Myeloid Dendritic Cells	myeloid	not kept	not kept	not kept	myeloid
GSM158187	GSE6863	PBMC CD14+ 100ng/mL IL4 + IL4 Normoxia	Myeloid Dendritic Cells	myeloid	not kept	not kept	not kept	myeloid
GSM158148	GSE6863	PBMC CD14+ 100ng/mL IL4 + IL4 Hypoxia	Myeloid Dendritic Cells	myeloid	not kept	not kept	not kept	myeloid
GSM158182	GSE6863	PBMC CD14+ 100ng/mL IL4 + IL4 Hypoxia	Myeloid Dendritic Cells	myeloid	not kept	not kept	not kept	myeloid
GSM158183	GSE6863	PBMC CD14+ 100ng/mL IL4 + IL4 Hypoxia	Myeloid Dendritic Cells	myeloid	not kept	not kept	not kept	myeloid
GSM260689	GSE10316	PBMC CD14+ + GM-CSF + IL4	Myeloid Dendritic Cells	myeloid	not kept	not kept	not kept	myeloid
GSM260690	GSE10316	PBMC CD14+ + GM-CSF + IL4 + LPS 4h	Myeloid Dendritic Cells	myeloid	not kept	not kept	not kept	myeloid
GSM260691	GSE10316	PBMC CD14+ + GM-CSF + IL4 + LPS 8h	Myeloid Dendritic Cells	myeloid	not kept	not kept	not kept	myeloid
GSM260692	GSE10316	PBMC CD14+ + GM-CSF + IL4 + LPS 16h	Myeloid Dendritic Cells	myeloid	not kept	not kept	not kept	myeloid
GSM260693	GSE10316	PBMC CD14+ + GM-CSF + IL4 + Poly(I:C) 4h	Myeloid Dendritic Cells	myeloid	not kept	not kept	not kept	myeloid
GSM260694	GSE10316	PBMC CD14+ + GM-CSF + IL4 + Poly(I:C) 8h	Myeloid Dendritic Cells	myeloid	not kept	not kept	not kept	myeloid
GSM260695	GSE10316	PBMC CD14+ + GM-CSF + IL4 + Poly(I:C) 16h	Myeloid Dendritic Cells	myeloid	not kept	not kept	not kept	myeloid
GSM260696	GSE10316	PBMC CD14+ + GM-CSF + IL4 + CD40L 4h	Myeloid Dendritic Cells	myeloid	not kept	not kept	not kept	myeloid
GSM260697	GSE10316	PBMC CD14+ + GM-CSF + IL4 + CD40L 8h	Myeloid Dendritic Cells	myeloid	not kept	not kept	not kept	myeloid
GSM260698	GSE10316	PBMC CD14+ + GM-CSF + IL4 + CD40L 16h	Myeloid Dendritic Cells	myeloid	not kept	not kept	not kept	myeloid
GSM260699	GSE10316	PBMC CD14+ + GM-CSF + IL4 + IL-1-b, IL-6, TNF-a and PGE2 4h	Myeloid Dendritic Cells	myeloid	not kept	not kept	not kept	myeloid
GSM260700	GSE10316	PBMC CD14+ + GM-CSF + IL4 + IL-1-b, IL-6, TNF-a and PGE2 8h	Myeloid Dendritic Cells	myeloid	not kept	not kept	not kept	myeloid
GSM260701	GSE10316	PBMC CD14+ + GM-CSF + IL4 + IL-1-b, IL-6, TNF-a and PGE2 16h	Myeloid Dendritic Cells	myeloid	not kept	not kept	not kept	myeloid
GSM554394	GSM554394	CD14+ GM-CSF IL4 100ng/mL + TNFa IL1B 50ng/mL IL6 10ng/mL PGE2 1mM Hypoxia	Myeloid Dendritic Cells	myeloid	not kept	not kept	not kept	myeloid
GSM554395	GSM554394	CD14+ GM-CSF IL4 100ng/mL + TNFa IL1B 50ng/mL IL6 10ng/mL PGE2 1mM Hypoxia	Myeloid Dendritic Cells	myeloid	not kept	not kept	not kept	myeloid
GSM554396	GSM554394	CD14+ GM-CSF IL4 100ng/mL + TNFa IL1B 50ng/mL IL6 10ng/mL PGE2 1mM Hypoxia	Myeloid Dendritic Cells	myeloid	not kept	not kept	not kept	myeloid
GSM554397	GSM554394	CD14+ GM-CSF IL4 100ng/mL + TNFa IL1B 50ng/mL IL6 10ng/mL PGE2 1mM Normoxia	Myeloid Dendritic Cells	myeloid	not kept	not kept	not kept	myeloid
GSM554398	GSM554394	CD14+ GM-CSF IL4 100ng/mL + TNFa IL1B 50ng/mL IL6 10ng/mL PGE2 1mM Normoxia	Myeloid Dendritic Cells	myeloid	not kept	not kept	not kept	myeloid
GSM554399	GSM554394	CD14+ GM-CSF IL4 100ng/mL + TNFa IL1B 50ng/mL IL6 10ng/mL PGE2 1mM Normoxia	Myeloid Dendritic Cells	myeloid	not kept	not kept	not kept	myeloid
GSM579100	GSE23618	PBMC CD14+ 500U/mL IL4 800U/mL GM-CSF	Myeloid Dendritic Cells	myeloid	not kept	not kept	not kept	myeloid
GSM579101	GSE23618	PBMC CD14+ 500U/mL IL4 800U/mL GM-CSF	Myeloid Dendritic Cells	myeloid	not kept	not kept	not kept	myeloid
GSM579102	GSE23618	PBMC CD14+ 500U/mL IL4 800U/mL GM-CSF	Myeloid Dendritic Cells	myeloid	not kept	not kept	not kept	myeloid
GSM579103	GSE23618	CD1a+ cells from Dermis	Dermal Dendritic Cells	myeloid	not kept	not kept	not kept	myeloid
GSM579104	GSE23618	CD1a+ cells from Dermis	Dermal Dendritic Cells	myeloid	not kept	not kept	not kept	myeloid
GSM579105	GSE23618	CD1a+ cells from Dermis	Dermal Dendritic Cells	myeloid	not kept	not kept	not kept	myeloid
GSM579106	GSE23618	CD1a+ cells from Epidermal Sheets	Langerhans Cells	myeloid	not kept	not kept	not kept	myeloid
GSM579107	GSE23618	CD1a+ cells from Epidermal Sheets	Langerhans Cells	myeloid	not kept	not kept	not kept	myeloid
GSM579108	GSE23618	CD1a+ cells from Epidermal Sheets	Langerhans Cells	myeloid	not kept	not kept	not kept	myeloid
GSM579109	GSE23618	CD1c+ Blood DCs	Myeloid Dendritic Cells	myeloid	not kept	not kept	not kept	myeloid
GSM579110	GSE23618	CD1c+ Blood DCs	Myeloid Dendritic Cells	myeloid	not kept	not kept	not kept	myeloid
GSM579111	GSE23618	CD1c+ Blood DCs	Myeloid Dendritic Cells	myeloid	not kept	not kept	not kept	myeloid
GSM850440	GSE34515	PBMC CD14++ CD16-	Monocytes	myeloid	not kept	not kept	not kept	myeloid
GSM850441	GSE34515	PBMC CD14++ CD16-	Monocytes	myeloid	not kept	not kept	not kept	myeloid
GSM850442	GSE34515	PBMC CD14++ CD16-	Monocytes	myeloid	not kept	not kept	not kept	myeloid
GSM850443	GSE34515	PBMC CD14+ CD16+	Monocytes	myeloid	not kept	not kept	not kept	myeloid
GSM850444	GSE34515	PBMC CD14+ CD16+	Monocytes	myeloid	not kept	not kept	not kept	myeloid
GSM850445	GSE34515	PBMC CD14+ CD16+	Monocytes	myeloid	not kept	not kept	not kept	myeloid
GSM850446	GSE34515	PBMC CD1c+	Dendritic cells	myeloid	not kept	not kept	not kept	myeloid
GSM850447	GSE34515	PBMC CD1c+	Dendritic cells	myeloid	not kept	not kept	not kept	myeloid
GSM850448	GSE34515	PBMC CD1c+	Dendritic cells	myeloid	not kept	not kept	not kept	myeloid
GSM622849	GSE25320	HMC-1 cell line	Mast cell	myeloid	not kept	not kept	not kept	myeloid
GSM622850	GSE25320	HMC-1 cell line	Mast cell	myeloid	not kept	not kept	not kept	myeloid
GSM622851	GSE25320	HMC-1 cell line	Mast cell	myeloid	not kept	not kept	not kept	myeloid
GSM622852	GSE25320	HMC-1 cell line	Mast cell	myeloid	not kept	not kept	not kept	myeloid
GSM886891	GSE36133	Cell_Lines	Breast	Cancer cells	not kept	not kept	not kept	kc sein
GSM886892	GSE36133	Cell_Lines	Breast	Cancer cells	not kept	not kept	not kept	kc sein
GSM886893	GSE36133	Cell_Lines	Breast	Cancer cells	not kept	not kept	not kept	kc sein
GSM886894	GSE36133	Cell_Lines	Breast	Cancer cells	not kept	not kept	not kept	kc sein
GSM886904	GSE36133	Cell_Lines	Breast	Cancer cells	not kept	not kept	not kept	kc sein
GSM886909	GSE36133	Cell_Lines	Breast	Cancer cells	not kept	not kept	not kept	kc sein
GSM886917	GSE36133	Cell_Lines	Breast	Cancer cells	not kept	not kept	not kept	kc sein
GSM886989	GSE36133	Cell_Lines	Breast	Cancer cells	not kept	not kept	not kept	kc sein
GSM886998	GSE36133	Cell_Lines	Breast	Cancer cells	not kept	not kept	not kept	kc sein
GSM886999	GSE36133	Cell_Lines	Breast	Cancer cells	not kept	not kept	not kept	kc sein
GSM887033	GSE36133	Cell_Lines	Breast	Cancer cells	not kept	not kept	not kept	kc sein
GSM887035	GSE36133	Cell_Lines	Breast	Cancer cells	not kept	not kept	not kept	kc sein
GSM887037	GSE36133	Cell_Lines	Breast	Cancer cells	not kept	not kept	not kept	kc sein
GSM887038	GSE36133	Cell_Lines	Breast	Cancer cells	not kept	not kept	not kept	kc sein
GSM887039	GSE36133	Cell_Lines	Breast	Cancer cells	not kept	not kept	not kept	kc sein
GSM887040	GSE36133	Cell_Lines	Breast	Cancer cells	not kept	not kept	not kept	kc sein
GSM887041	GSE36133	Cell_Lines	Breast	Cancer cells	not kept	not kept	not kept	kc sein
GSM887042	GSE36133	Cell_Lines	Breast	Cancer cells	not kept	not kept	not kept	kc sein
GSM887044	GSE36133	Cell_Lines	Breast	Cancer cells	not kept	not kept	not kept	kc sein
GSM887045	GSE36133	Cell_Lines	Breast	Cancer cells	not kept	not kept	not kept	kc sein
GSM887046	GSE36133	Cell_Lines	Breast	Cancer cells	not kept	not kept	not kept	kc sein
GSM887047	GSE36133	Cell_Lines	Breast	Cancer cells	not kept	not kept	not kept	kc sein
GSM887048	GSE36133	Cell_Lines	Breast	Cancer cells	not kept	not kept	not kept	kc sein
GSM887049	GSE36133	Cell_Lines	Breast	Cancer cells	not kept	not kept	not kept	kc sein
GSM887054	GSE36133	Cell_Lines	Breast	Cancer cells	not kept	not kept	not kept	kc sein
GSM887058	GSE36133	Cell_Lines	Breast	Cancer cells	not kept	not kept	not kept	kc sein
GSM887066	GSE36133	Cell_Lines	Breast	Cancer cells	not kept	not kept	not kept	kc sein
GSM887094	GSE36133	Cell_Lines	Breast	Cancer cells	not kept	not kept	not kept	kc sein
GSM887095	GSE36133	Cell_Lines	Breast	Cancer cells	not kept	not kept	not kept	kc sein
GSM887097	GSE36133	Cell_Lines	Breast	Cancer cells	not kept	not kept	not kept	kc sein
GSM887098	GSE36133	Cell_Lines	Breast	Cancer cells	not kept	not kept	not kept	kc sein
GSM887101	GSE36133	Cell_Lines	Breast	Cancer cells	not kept	not kept	not kept	kc sein
GSM887113	GSE36133	Cell_Lines	Breast	Cancer cells	not kept	not kept	not kept	kc sein
GSM887114	GSE36133	Cell_Lines	Breast	Cancer cells	not kept	not kept	not kept	kc sein
GSM887183	GSE36133	Cell_Lines	Breast	Cancer cells	not kept	not kept	not kept	kc sein
GSM887291	GSE36133	Cell_Lines	Breast	Cancer cells	not kept	not kept	not kept	kc sein
GSM887292	GSE36133	Cell_Lines	Breast	Cancer cells	not kept	not kept	not kept	kc sein
GSM887293	GSE36133	Cell_Lines	Breast	Cancer cells	not kept	not kept	not kept	kc sein
GSM887294	GSE36133	Cell_Lines	Breast	Cancer cells	not kept	not kept	not kept	kc sein
GSM887295	GSE36133	Cell_Lines	Breast	Cancer cells	not kept	not kept	not kept	kc sein
GSM887296	GSE36133	Cell_Lines	Breast	Cancer cells	not kept	not kept	not kept	kc sein
GSM887297	GSE36133	Cell_Lines	Breast	Cancer cells	not kept	not kept	not kept	kc sein
GSM887299	GSE36133	Cell_Lines	Breast	Cancer cells	not kept	not kept	not kept	kc sein
GSM887300	GSE36133	Cell_Lines	Breast	Cancer cells	not kept	not kept	not kept	kc sein
GSM887301	GSE36133	Cell_Lines	Breast	Cancer cells	not kept	not kept	not kept	kc sein
GSM887575	GSE36133	Cell_Lines	Breast	Cancer cells	not kept	not kept	not kept	kc sein
GSM887727	GSE36133	Cell_Lines	Breast	Cancer cells	not kept	not kept	not kept	kc sein
GSM887728	GSE36133	Cell_Lines	Breast	Cancer cells	not kept	not kept	not kept	kc sein
GSM887749	GSE36133	Cell_Lines	Breast	Cancer cells	not kept	not kept	not kept	kc sein
GSM887750	GSE36133	Cell_Lines	Breast	Cancer cells	not kept	not kept	not kept	kc sein
GSM887751	GSE36133	Cell_Lines	Breast	Cancer cells	not kept	not kept	not kept	kc sein
GSM1108141	GSE45535	From Peripheral Blood CD14+	Monocytes	myeloid	not kept	not kept	not kept	myeloid
GSM1108147	GSE45535	From Peripheral Blood CD14+	Monocytes	myeloid	not kept	not kept	not kept	myeloid
GSM1108140	GSE45535	From Peripheral Blood CD15+	Granulocyte	myeloid	not kept	not kept	not kept	myeloid
GSM1108146	GSE45535	From Peripheral Blood CD15+	Granulocyte	myeloid	not kept	not kept	not kept	myeloid
GSM705316	GSE28490	PBMC CD8+ kit	CD8 T cells	Lymphoids	Tcells	CD8	not kept	CD8
GSM705402	GSE28491	PBMC CD19+ kit	B cells	Lymphoids	Bcells	not kept	not kept	Bcells
GSM705403	GSE28491	PBMC CD19+ kit	B cells	Lymphoids	Bcells	not kept	not kept	Bcells
GSM705404	GSE28491	PBMC CD19+ kit	B cells	Lymphoids	Bcells	not kept	not kept	Bcells
GSM705405	GSE28491	PBMC CD19+ kit	B cells	Lymphoids	Bcells	not kept	not kept	Bcells
GSM705406	GSE28491	PBMC CD19+ kit	B cells	Lymphoids	Bcells	not kept	not kept	Bcells
GSM980737	GSE39889	From blood. Percoll	Neutrophils	myeloid	not kept	not kept	not kept	Bcells
GSM980741	GSE39889	From blood. Percoll	Neutrophils	myeloid	not kept	not kept	not kept	Bcells
GSM980745	GSE39889	From blood. Percoll	Neutrophils	myeloid	not kept	not kept	not kept	myeloid
GSM980749	GSE39889	From blood. Percoll	Neutrophils	myeloid	not kept	not kept	not kept	myeloid
GSM980734	GSE39889	From blood. Percoll. 2h Rough Mycobacterium	Neutrophils	myeloid	not kept	not kept	not kept	myeloid
GSM980738	GSE39889	From blood. Percoll. 2h Rough Mycobacterium	Neutrophils	myeloid	not kept	not kept	not kept	myeloid
GSM980742	GSE39889	From blood. Percoll. 2h Rough Mycobacterium	Neutrophils	myeloid	not kept	not kept	not kept	myeloid
GSM980746	GSE39889	From blood. Percoll. 2h Rough Mycobacterium	Neutrophils	myeloid	not kept	not kept	not kept	myeloid
GSM980735	GSE39889	From blood. Percoll. 2h Smooth Mycobacterium	Neutrophils	myeloid	not kept	not kept	not kept	myeloid
GSM980739	GSE39889	From blood. Percoll. 2h Smooth Mycobacterium	Neutrophils	myeloid	not kept	not kept	not kept	myeloid
GSM980743	GSE39889	From blood. Percoll. 2h Smooth Mycobacterium	Neutrophils	myeloid	not kept	not kept	not kept	myeloid
GSM980747	GSE39889	From blood. Percoll. 2h Smooth Mycobacterium	Neutrophils	myeloid	not kept	not kept	not kept	myeloid
GSM980736	GSE39889	From blood. Percoll. 2h Staphylococcus Aureus	Neutrophils	myeloid	not kept	not kept	not kept	myeloid
GSM980740	GSE39889	From blood. Percoll. 2h Staphylococcus Aureus	Neutrophils	myeloid	not kept	not kept	not kept	myeloid
GSM980744	GSE39889	From blood. Percoll. 2h Staphylococcus Aureus	Neutrophils	myeloid	not kept	not kept	not kept	myeloid
GSM980748	GSE39889	From blood. Percoll. 2h Staphylococcus Aureus	Neutrophils	myeloid	not kept	not kept	not kept	myeloid
GSM839124	GSE33939	From Venous Whole Blood moins erythrocytes. Cells Cultured in RPMI 1640 Medium time 0	Granulocyte	myeloid	not kept	not kept	not kept	myeloid
GSM839125	GSE33939	From Venous Whole Blood moins erythrocytes. Cells Cultured in RPMI 1640 Medium time 0	Granulocyte	myeloid	not kept	not kept	not kept	myeloid
GSM839126	GSE33939	From Venous Whole Blood moins erythrocytes. Cells Cultured in RPMI 1640 Medium time 0	Granulocyte	myeloid	not kept	not kept	not kept	myeloid
GSM839127	GSE33939	From Venous Whole Blood moins erythrocytes. Cells Cultured in RPMI 1640 Medium time 30	Granulocyte	myeloid	not kept	not kept	not kept	myeloid
GSM839128	GSE33939	From Venous Whole Blood moins erythrocytes. Cells Cultured in RPMI 1640 Medium time 30	Granulocyte	myeloid	not kept	not kept	not kept	myeloid
GSM839129	GSE33939	From Venous Whole Blood moins erythrocytes. Cells Cultured in RPMI 1640 Medium time 30	Granulocyte	myeloid	not kept	not kept	not kept	myeloid
GSM839130	GSE33939	From Venous Whole Blood moins erythrocytes. Cells Cultured in RPMI 1640 Medium time 60	Granulocyte	myeloid	not kept	not kept	not kept	myeloid
GSM839131	GSE33939	From Venous Whole Blood moins erythrocytes. Cells Cultured in RPMI 1640 Medium time 60	Granulocyte	myeloid	not kept	not kept	not kept	myeloid
GSM839132	GSE33939	From Venous Whole Blood moins erythrocytes. Cells Cultured in RPMI 1640 Medium time 60	Granulocyte	myeloid	not kept	not kept	not kept	myeloid
GSM839133	GSE33939	From Venous Whole Blood moins erythrocytes. Cells Cultured in RPMI 1640 Medium time 180	Granulocyte	myeloid	not kept	not kept	not kept	myeloid
GSM839134	GSE33939	From Venous Whole Blood moins erythrocytes. Cells Cultured in RPMI 1640 Medium time 180	Granulocyte	myeloid	not kept	not kept	not kept	myeloid
GSM839135	GSE33939	From Venous Whole Blood moins erythrocytes. Cells Cultured in RPMI 1640 Medium time 180	Granulocyte	myeloid	not kept	not kept	not kept	myeloid
GSM980212	GSE39840	From Umbilical Cord blood.Percoll.PBS.CD14+	Monocytes	myeloid	not kept	not kept	not kept	myeloid
GSM980213	GSE39840	From Umbilical Cord blood.Percoll.PBS.CD14+	Monocytes	myeloid	not kept	not kept	not kept	myeloid
GSM980214	GSE39840	From Umbilical Cord blood.Percoll.PBS.CD14+	Monocytes	myeloid	not kept	not kept	not kept	myeloid
GSM980215	GSE39840	From Umbilical Cord blood.Percoll.PBS.CD14+	Monocytes	myeloid	not kept	not kept	not kept	myeloid
GSM980216	GSE39840	From Umbilical Cord blood.Percoll.PBS.CD14+	Monocytes	myeloid	not kept	not kept	not kept	myeloid
GSM980217	GSE39840	From Umbilical Cord blood.Percoll.LPS.CD14+	Monocytes	myeloid	not kept	not kept	not kept	myeloid
GSM980218	GSE39840	From Umbilical Cord blood.Percoll.LPS.CD14+	Monocytes	myeloid	not kept	not kept	not kept	myeloid
GSM980219	GSE39840	From Umbilical Cord blood.Percoll.LPS.CD14+	Monocytes	myeloid	not kept	not kept	not kept	myeloid
GSM980220	GSE39840	From Umbilical Cord blood.Percoll.LPS.CD14+	Monocytes	myeloid	not kept	not kept	not kept	myeloid
GSM980221	GSE39840	From Umbilical Cord blood.Percoll.LPS.CD14+	Monocytes	myeloid	not kept	not kept	not kept	myeloid
GSM980222	GSE39840	From Umbilical Cord blood.Percoll.PBS.CD14+	Granulocyte	myeloid	not kept	not kept	not kept	myeloid
GSM980223	GSE39840	From Umbilical Cord blood.Percoll.PBS.CD14+	Granulocyte	myeloid	not kept	not kept	not kept	myeloid
GSM980224	GSE39840	From Umbilical Cord blood.Percoll.PBS.CD14+	Granulocyte	myeloid	not kept	not kept	not kept	myeloid
GSM980225	GSE39840	From Umbilical Cord blood.Percoll.PBS.CD14+	Granulocyte	myeloid	not kept	not kept	not kept	myeloid
GSM980226	GSE39840	From Umbilical Cord blood.Percoll.PBS.CD14+	Granulocyte	myeloid	not kept	not kept	not kept	myeloid
GSM980227	GSE39840	From Umbilical Cord blood.Percoll.LPS.CD14+	Granulocyte	myeloid	not kept	not kept	not kept	myeloid
GSM980228	GSE39840	From Umbilical Cord blood.Percoll.LPS.CD14+	Granulocyte	myeloid	not kept	not kept	not kept	myeloid
GSM980229	GSE39840	From Umbilical Cord blood.Percoll.LPS.CD14+	Granulocyte	myeloid	not kept	not kept	not kept	myeloid
GSM980230	GSE39840	From Umbilical Cord blood.Percoll.LPS.CD14+	Granulocyte	myeloid	not kept	not kept	not kept	myeloid
GSM980231	GSE39840	From Umbilical Cord blood.Percoll.LPS.CD14+	Granulocyte	myeloid	not kept	not kept	not kept	myeloid
GSM940484	GSE38351	From Peripheral Blood.RA.CD15- MACs Beads.CD14+	Monocytes	myeloid	not kept	not kept	not kept	myeloid
GSM940485	GSE38351	From Peripheral Blood.RA.CD15- MACs Beads.CD14+	Monocytes	myeloid	not kept	not kept	not kept	myeloid
GSM940486	GSE38351	From Peripheral Blood.RA.CD15- MACs Beads.CD14+	Monocytes	myeloid	not kept	not kept	not kept	myeloid
GSM940487	GSE38351	From Peripheral Blood.RA.CD15- MACs Beads.CD14+	Monocytes	myeloid	not kept	not kept	not kept	myeloid
GSM940488	GSE38351	From Peripheral Blood.Healthy.CD15- MACs Beads.CD14+.TNFa stimulation 1,5 Hour	Monocytes	myeloid	not kept	not kept	not kept	myeloid
GSM940489	GSE38351	From Peripheral Blood.Healthy.CD15- MACs Beads.CD14+.TNFa stimulation 1,5 Hour	Monocytes	myeloid	not kept	not kept	not kept	myeloid
GSM940490	GSE38351	From Peripheral Blood.Healthy.CD15- MACs Beads.CD14+.TNFa stimulation 1,5 Hour	Monocytes	myeloid	not kept	not kept	not kept	myeloid
GSM940491	GSE38351	From Peripheral Blood.Healthy.CD15- MACs Beads.CD14+.IFNa2a stimulation 1,5 Hour	Monocytes	myeloid	not kept	not kept	not kept	myeloid
GSM940492	GSE38351	From Peripheral Blood.Healthy.CD15- MACs Beads.CD14+.IFNa2a stimulation 1,5 Hour	Monocytes	myeloid	not kept	not kept	not kept	myeloid
GSM940493	GSE38351	From Peripheral Blood.Healthy.CD15- MACs Beads.CD14+.IFNa2a stimulation 1,5 Hour	Monocytes	myeloid	not kept	not kept	not kept	myeloid
GSM940494	GSE38351	From Peripheral Blood.Healthy.CD15- MACs Beads.CD14+.IFNa2a stimulation 1,5 Hour	Monocytes	myeloid	not kept	not kept	not kept	myeloid
GSM940495	GSE38351	From Peripheral Blood.Healthy.CD15- MACs Beads.CD14+.IFNa2a stimulation 1,5 Hour	Monocytes	myeloid	not kept	not kept	not kept	myeloid
GSM940496	GSE38351	From Peripheral Blood.Healthy.CD15- MACs Beads.CD14+.IFNa2a stimulation 1,5 Hour	Monocytes	myeloid	not kept	not kept	not kept	myeloid
GSM940497	GSE38351	From Peripheral Blood.Healthy.CD15- MACs Beads.CD14+.IFNa2a stimulation 1,5 Hour	Monocytes	myeloid	not kept	not kept	not kept	myeloid
GSM940498	GSE38351	From Peripheral Blood.Healthy.CD15- MACs Beads.CD14+.IFNg stimulation 1,5 Hour	Monocytes	myeloid	not kept	not kept	not kept	myeloid
GSM940499	GSE38351	From Peripheral Blood.Healthy.CD15- MACs Beads.CD14+.IFNg stimulation 1,5 Hour	Monocytes	myeloid	not kept	not kept	not kept	myeloid
GSM940500	GSE38351	From Peripheral Blood.Healthy.CD15- MACs Beads.CD14+.IFNg stimulation 1,5 Hour	Monocytes	myeloid	not kept	not kept	not kept	myeloid
GSM940501	GSE38351	From Peripheral Blood.Healthy.CD15- MACs Beads.CD14+.IFNg stimulation 1,5 Hour	Monocytes	myeloid	not kept	not kept	not kept	myeloid
GSM940502	GSE38351	From Peripheral Blood.Healthy.CD15- MACs Beads.CD14+.IFNg stimulation 1,5 Hour	Monocytes	myeloid	not kept	not kept	not kept	myeloid
GSM940503	GSE38351	From Peripheral Blood.Healthy.CD15- MACs Beads.CD14+.IFNg stimulation 1,5 Hour	Monocytes	myeloid	not kept	not kept	not kept	myeloid
GSM940504	GSE38351	From Peripheral Blood.Healthy.CD15- MACs Beads.CD14+.IFNg stimulation 1,5 Hour	Monocytes	myeloid	not kept	not kept	not kept	myeloid
GSM940505	GSE38351	From Peripheral Blood.Healthy.CD15- MACs Beads.CD14+.Without stimulation 1,5 Hour	Monocytes	myeloid	not kept	not kept	not kept	myeloid
GSM940506	GSE38351	From Peripheral Blood.Healthy.CD15- MACs Beads.CD14+.Without stimulation 1,5 Hour	Monocytes	myeloid	not kept	not kept	not kept	myeloid
GSM940507	GSE38351	From Peripheral Blood.Healthy.CD15- MACs Beads.CD14+.Without stimulation 1,5 Hour	Monocytes	myeloid	not kept	not kept	not kept	myeloid
GSM940508	GSE38351	From Peripheral Blood.Healthy.CD15- MACs Beads.CD14+.Without stimulation 1,5 Hour	Monocytes	myeloid	not kept	not kept	not kept	myeloid
GSM940509	GSE38351	From Peripheral Blood.Healthy.CD15- MACs Beads.CD14+.Without stimulation 1,5 Hour	Monocytes	myeloid	not kept	not kept	not kept	myeloid
GSM940510	GSE38351	From Peripheral Blood.Healthy.CD15- MACs Beads.CD14+.Without stimulation 1,5 Hour	Monocytes	myeloid	not kept	not kept	not kept	myeloid
GSM940511	GSE38351	From Peripheral Blood.Healthy.CD15- MACs Beads.CD14+.Without stimulation 1,5 Hour	Monocytes	myeloid	not kept	not kept	not kept	myeloid
GSM940512	GSE38351	From Peripheral Blood.Healthy.CD15- MACs Beads.CD14+.Without stimulation 1,5 Hour	Monocytes	myeloid	not kept	not kept	not kept	myeloid
GSM940513	GSE38351	From Peripheral Blood.Healthy.CD15- MACs Beads.CD14+.Without stimulation 1,5 Hour	Monocytes	myeloid	not kept	not kept	not kept	myeloid
GSM940514	GSE38351	From Peripheral Blood.Healthy.CD15- MACs Beads.CD14+.Without stimulation 1,5 Hour	Monocytes	myeloid	not kept	not kept	not kept	myeloid
GSM940515	GSE38351	From Peripheral Blood.Healthy.CD15- MACs Beads.CD14+.Without stimulation 1,5 Hour	Monocytes	myeloid	not kept	not kept	not kept	myeloid
GSM940516	GSE38351	From Peripheral Blood.Healthy.CD15- MACs Beads.CD14+.Isolated immediately after drawing blood	Monocytes	myeloid	not kept	not kept	not kept	myeloid
GSM940517	GSE38351	From Peripheral Blood.Healthy.CD15- MACs Beads.CD14+.Isolated immediately after drawing blood	Monocytes	myeloid	not kept	not kept	not kept	myeloid
GSM940518	GSE38351	From Peripheral Blood.Healthy.CD15- MACs Beads.CD14+.Isolated immediately after drawing blood	Monocytes	myeloid	not kept	not kept	not kept	myeloid
GSM940519	GSE38351	From Peripheral Blood.Healthy.CD15- MACs Beads.CD14+.Isolated immediately after drawing blood	Monocytes	myeloid	not kept	not kept	not kept	myeloid
GSM940520	GSE38351	From Peripheral Blood.Healthy.CD15- MACs Beads.CD14+.Isolated immediately after drawing blood	Monocytes	myeloid	not kept	not kept	not kept	myeloid
GSM940521	GSE38351	From Peripheral Blood.Healthy.CD15- MACs Beads.CD14+.Isolated immediately after drawing blood	Monocytes	myeloid	not kept	not kept	not kept	myeloid
GSM940522	GSE38351	From Peripheral Blood.Healthy.CD15- MACs Beads.CD14+.Isolated immediately after drawing blood	Monocytes	myeloid	not kept	not kept	not kept	myeloid
GSM940523	GSE38351	From Peripheral Blood.Healthy.CD15- MACs Beads.CD14+.Isolated immediately after drawing blood	Monocytes	myeloid	not kept	not kept	not kept	myeloid
GSM873441	GSE35683	From Umbilical Cord Blood.CD15- MACs Beads.CD14+.LPS + IL-10 Stimulation	Monocytes	myeloid	not kept	not kept	not kept	myeloid
GSM873442	GSE35683	From Umbilical Cord Blood.CD15- MACs Beads.CD14+.LPS + IL-10 Stimulation	Monocytes	myeloid	not kept	not kept	not kept	myeloid
GSM873443	GSE35683	From Umbilical Cord Blood.CD15- MACs Beads.CD14+.LPS + IL-10 Stimulation	Monocytes	myeloid	not kept	not kept	not kept	myeloid
GSM873444	GSE35683	From Umbilical Cord Blood.CD15- MACs Beads.CD14+.LPS + IL-10 Stimulation	Monocytes	myeloid	not kept	not kept	not kept	myeloid
GSM873445	GSE35683	From Umbilical Cord Blood.CD15- MACs Beads.CD14+.LPS + IL-10 Stimulation	Monocytes	myeloid	not kept	not kept	not kept	myeloid
GSM873446	GSE35683	From Umbilical Cord Blood.CD15- MACs Beads.CD14+.LPS Stimulation	Monocytes	myeloid	not kept	not kept	not kept	myeloid
GSM873447	GSE35683	From Umbilical Cord Blood.CD15- MACs Beads.CD14+.LPS Stimulation	Monocytes	myeloid	not kept	not kept	not kept	myeloid
GSM873448	GSE35683	From Umbilical Cord Blood.CD15- MACs Beads.CD14+.LPS Stimulation	Monocytes	myeloid	not kept	not kept	not kept	myeloid
GSM873449	GSE35683	From Umbilical Cord Blood.CD15- MACs Beads.CD14+.LPS Stimulation	Monocytes	myeloid	not kept	not kept	not kept	myeloid
GSM873450	GSE35683	From Umbilical Cord Blood.CD15- MACs Beads.CD14+.LPS Stimulation	Monocytes	myeloid	not kept	not kept	not kept	myeloid
GSM873456	GSE35683	From Umbilical Cord Blood. LPS + IL-10 Stimulation	Granulocyte	myeloid	not kept	not kept	not kept	myeloid
GSM873457	GSE35683	From Umbilical Cord Blood. LPS + IL-10 Stimulation	Granulocyte	myeloid	not kept	not kept	not kept	myeloid
GSM873458	GSE35683	From Umbilical Cord Blood. LPS + IL-10 Stimulation	Granulocyte	myeloid	not kept	not kept	not kept	myeloid
GSM873459	GSE35683	From Umbilical Cord Blood. LPS + IL-10 Stimulation	Granulocyte	myeloid	not kept	not kept	not kept	myeloid
GSM873460	GSE35683	From Umbilical Cord Blood. LPS + IL-10 Stimulation	Granulocyte	myeloid	not kept	not kept	not kept	myeloid
GSM873461	GSE35683	From Umbilical Cord Blood. LPS Stimulation	Granulocyte	myeloid	not kept	not kept	not kept	myeloid
GSM873462	GSE35683	From Umbilical Cord Blood. LPS Stimulation	Granulocyte	myeloid	not kept	not kept	not kept	myeloid
GSM873463	GSE35683	From Umbilical Cord Blood. LPS Stimulation	Granulocyte	myeloid	not kept	not kept	not kept	myeloid
GSM873464	GSE35683	From Umbilical Cord Blood. LPS Stimulation	Granulocyte	myeloid	not kept	not kept	not kept	myeloid
GSM873465	GSE35683	From Umbilical Cord Blood. LPS Stimulation	Granulocyte	myeloid	not kept	not kept	not kept	myeloid
GSM664085	GSE26975	From Peripheral Blood. Healthy Control. CD15+.CD14+.CD10+	Neutrophils	myeloid	not kept	not kept	not kept	myeloid
GSM664086	GSE26975	From Peripheral Blood. Healthy Control. CD15+.CD14+.CD10+	Neutrophils	myeloid	not kept	not kept	not kept	myeloid
GSM664087	GSE26975	From Peripheral Blood. Healthy Control. CD15+.CD14+.CD10+	Neutrophils	myeloid	not kept	not kept	not kept	myeloid
GSM664088	GSE26975	From Peripheral Blood. Healthy Control. CD15+.CD14+.CD10+	Neutrophils	myeloid	not kept	not kept	not kept	myeloid
GSM664089	GSE26975	From Peripheral Blood. Healthy Control. CD15+.CD14+.CD10+	Neutrophils	myeloid	not kept	not kept	not kept	myeloid
GSM664090	GSE26975	From Peripheral Blood. Healthy Control. CD15+.CD14+.CD10+	Neutrophils	myeloid	not kept	not kept	not kept	myeloid
GSM664091	GSE26975	From Peripheral Blood. Healthy Control. CD15+.CD14+.CD10+	Neutrophils	myeloid	not kept	not kept	not kept	myeloid
GSM664092	GSE26975	From Peripheral Blood. Healthy Control. CD15+.CD14+.CD10+	Neutrophils	myeloid	not kept	not kept	not kept	myeloid
GSM664093	GSE26975	From Peripheral Blood. Healthy Control. CD15+.CD14+.CD10+	Neutrophils	myeloid	not kept	not kept	not kept	myeloid
GSM664094	GSE26975	From Peripheral Blood. Lupus. CD15+.CD14+.CD10+	Neutrophils	myeloid	not kept	not kept	not kept	myeloid
GSM664095	GSE26975	From Peripheral Blood. Lupus. CD15+.CD14+.CD10+	Neutrophils	myeloid	not kept	not kept	not kept	myeloid
GSM664096	GSE26975	From Peripheral Blood. Lupus. CD15+.CD14+.CD10+	Neutrophils	myeloid	not kept	not kept	not kept	myeloid
GSM664097	GSE26975	From Peripheral Blood. Lupus. CD15+.CD14+.CD10+	Neutrophils	myeloid	not kept	not kept	not kept	myeloid
GSM664098	GSE26975	From Peripheral Blood. Lupus. CD15+.CD14+.CD10+	Neutrophils	myeloid	not kept	not kept	not kept	myeloid
GSM664099	GSE26975	From Peripheral Blood. Lupus. CD15+.CD14+.CD10+	Neutrophils	myeloid	not kept	not kept	not kept	myeloid
GSM664100	GSE26975	From Peripheral Blood. Lupus. CD15+.CD14+.CD10+	Neutrophils	myeloid	not kept	not kept	not kept	myeloid
GSM664101	GSE26975	From Peripheral Blood. Lupus. CD15+.CD14+.CD10+	Neutrophils	myeloid	not kept	not kept	not kept	myeloid
GSM664102	GSE26975	From Peripheral Blood. Lupus. CD15+.CD14+.CD10+	Neutrophils	myeloid	not kept	not kept	not kept	myeloid
GSM664103	GSE26975	From Peripheral Blood. Lupus. CD15+.CD14+.CD10+	Neutrophils	myeloid	not kept	not kept	not kept	myeloid
GSM664104	GSE26975	From Peripheral Blood. Lupus. CD15+.CD14low.CD10+	Granulocyte	myeloid	not kept	not kept	not kept	myeloid
GSM664105	GSE26975	From Peripheral Blood. Lupus. CD15+.CD14low.CD10+	Granulocyte	myeloid	not kept	not kept	not kept	myeloid
GSM664106	GSE26975	From Peripheral Blood. Lupus. CD15+.CD14low.CD10+	Granulocyte	myeloid	not kept	not kept	not kept	myeloid
GSM664107	GSE26975	From Peripheral Blood. Lupus. CD15+.CD14low.CD10+	Granulocyte	myeloid	not kept	not kept	not kept	myeloid
GSM664108	GSE26975	From Peripheral Blood. Lupus. CD15+.CD14low.CD10+	Granulocyte	myeloid	not kept	not kept	not kept	myeloid
GSM664109	GSE26975	From Peripheral Blood. Lupus. CD15+.CD14low.CD10+	Granulocyte	myeloid	not kept	not kept	not kept	myeloid
GSM664110	GSE26975	From Peripheral Blood. Lupus. CD15+.CD14low.CD10+	Granulocyte	myeloid	not kept	not kept	not kept	myeloid
GSM664111	GSE26975	From Peripheral Blood. Lupus. CD15+.CD14low.CD10+	Granulocyte	myeloid	not kept	not kept	not kept	myeloid
GSM664112	GSE26975	From Peripheral Blood. Lupus. CD15+.CD14low.CD10+	Granulocyte	myeloid	not kept	not kept	not kept	myeloid
GSM664113	GSE26975	From Peripheral Blood. Lupus. CD15+.CD14low.CD10+	Granulocyte	myeloid	not kept	not kept	not kept	myeloid
GSM612262	GSE24897	From Blood. Treated with saline. CD14+	Macrophages	myeloid	not kept	not kept	not kept	myeloid
GSM612263	GSE24897	From Blood. Treated with saline. CD14+	Macrophages	myeloid	not kept	not kept	not kept	myeloid
GSM612264	GSE24897	From Blood. Treated with saline. CD14+	Macrophages	myeloid	not kept	not kept	not kept	myeloid
GSM612265	GSE24897	From Blood. Treated with Porphyromonas Gingivalis. CD14+	Macrophages	myeloid	not kept	not kept	not kept	myeloid
GSM612266	GSE24897	From Blood. Treated with Porphyromonas Gingivalis. CD14+	Macrophages	myeloid	not kept	not kept	not kept	myeloid
GSM612267	GSE24897	From Blood. Treated with Porphyromonas Gingivalis. CD14+	Macrophages	myeloid	not kept	not kept	not kept	myeloid
GSM612268	GSE24897	From Blood. Treated with Porphyromonas Gingivalis LPS. CD14+	Macrophages	myeloid	not kept	not kept	not kept	myeloid
GSM612269	GSE24897	From Blood. Treated with Porphyromonas Gingivalis LPS. CD14+	Macrophages	myeloid	not kept	not kept	not kept	myeloid
GSM612270	GSE24897	From Blood. Treated with Porphyromonas Gingivalis LPS. CD14+	Macrophages	myeloid	not kept	not kept	not kept	myeloid
GSM612271	GSE24897	From Blood. Treated with Porphyromonas Gingivalis Fimbriae. CD14+	Macrophages	myeloid	not kept	not kept	not kept	myeloid
GSM612272	GSE24897	From Blood. Treated with Porphyromonas Gingivalis Fimbriae. CD14+	Macrophages	myeloid	not kept	not kept	not kept	myeloid
GSM612273	GSE24897	From Blood. Treated with Porphyromonas Gingivalis Fimbriae. CD14+	Macrophages	myeloid	not kept	not kept	not kept	myeloid
GSM322286	GSE12838	From Blood. Buffy Coat	Neutrophils	myeloid	not kept	not kept	not kept	myeloid
GSM322287	GSE12838	From Blood. Buffy Coat	Neutrophils	myeloid	not kept	not kept	not kept	myeloid
GSM322288	GSE12838	From Blood. Buffy Coat	Neutrophils	myeloid	not kept	not kept	not kept	myeloid
GSM322289	GSE12838	From Blood. Buffy Coat	Neutrophils	myeloid	not kept	not kept	not kept	myeloid
GSM322290	GSE12838	From Blood. Buffy Coat	Neutrophils	myeloid	not kept	not kept	not kept	myeloid
GSM322291	GSE12838	From Blood. Buffy Coat	Neutrophils	myeloid	not kept	not kept	not kept	myeloid
GSM322292	GSE12838	From Blood. Buffy Coat	Neutrophils	myeloid	not kept	not kept	not kept	myeloid
GSM322293	GSE12838	From Blood. Buffy Coat	Neutrophils	myeloid	not kept	not kept	not kept	myeloid
GSM322294	GSE12838	From Blood. Buffy Coat	Neutrophils	myeloid	not kept	not kept	not kept	myeloid
GSM322295	GSE12838	From Blood. Buffy Coat	Neutrophils	myeloid	not kept	not kept	not kept	myeloid
GSM322296	GSE12838	From Blood. Buffy Coat	Neutrophils	myeloid	not kept	not kept	not kept	myeloid
GSM322297	GSE12838	From Blood. Buffy Coat	Neutrophils	myeloid	not kept	not kept	not kept	myeloid
GSM322298	GSE12838	From Blood. Buffy Coat	Neutrophils	myeloid	not kept	not kept	not kept	myeloid
GSM322299	GSE12838	From Blood. Buffy Coat	Neutrophils	myeloid	not kept	not kept	not kept	myeloid
GSM322300	GSE12838	From Blood. Buffy Coat	Neutrophils	myeloid	not kept	not kept	not kept	myeloid
GSM322301	GSE12838	From Blood. Buffy Coat	Neutrophils	myeloid	not kept	not kept	not kept	myeloid
GSM322302	GSE12838	From Blood. Buffy Coat	Neutrophils	myeloid	not kept	not kept	not kept	myeloid
GSM322303	GSE12838	From Blood. Buffy Coat	Neutrophils	myeloid	not kept	not kept	not kept	myeloid
GSM322304	GSE12838	From Blood. Buffy Coat	Neutrophils	myeloid	not kept	not kept	not kept	myeloid
GSM322305	GSE12838	From Blood. Buffy Coat	Neutrophils	myeloid	not kept	not kept	not kept	myeloid
GSM422118	GSE16837	From Heparinized Venous Blood. Control. 0 Hr 37C	Neutrophils	myeloid	not kept	not kept	not kept	myeloid
GSM422119	GSE16837	From Heparinized Venous Blood. Control. 0 Hr 37C	Neutrophils	myeloid	not kept	not kept	not kept	myeloid
GSM422120	GSE16837	From Heparinized Venous Blood. Control. 0 Hr 37C	Neutrophils	myeloid	not kept	not kept	not kept	myeloid
GSM422121	GSE16837	From Heparinized Venous Blood. Control. 0 Hr 37C	Neutrophils	myeloid	not kept	not kept	not kept	myeloid
GSM422122	GSE16837	From Heparinized Venous Blood. 1hr treated with S. aureus strain Col	Neutrophils	myeloid	not kept	not kept	not kept	myeloid
GSM422123	GSE16837	From Heparinized Venous Blood. 1hr treated with S. aureus strain Col	Neutrophils	myeloid	not kept	not kept	not kept	myeloid
GSM422124	GSE16837	From Heparinized Venous Blood. 1hr treated with S. aureus strain Col	Neutrophils	myeloid	not kept	not kept	not kept	myeloid
GSM422125	GSE16837	From Heparinized Venous Blood. 1hr treated with S. aureus strain Col	Neutrophils	myeloid	not kept	not kept	not kept	myeloid
GSM422126	GSE16837	From Heparinized Venous Blood. 1hr control	Neutrophils	myeloid	not kept	not kept	not kept	myeloid
GSM422127	GSE16837	From Heparinized Venous Blood. 1hr control	Neutrophils	myeloid	not kept	not kept	not kept	myeloid
GSM422128	GSE16837	From Heparinized Venous Blood. 1hr control	Neutrophils	myeloid	not kept	not kept	not kept	myeloid
GSM422129	GSE16837	From Heparinized Venous Blood. 1hr control	Neutrophils	myeloid	not kept	not kept	not kept	myeloid
GSM422130	GSE16837	From Heparinized Venous Blood. 1hr treated with S. aureus strain 10254	Neutrophils	myeloid	not kept	not kept	not kept	myeloid
GSM422131	GSE16837	From Heparinized Venous Blood. 1hr treated with S. aureus strain 10254	Neutrophils	myeloid	not kept	not kept	not kept	myeloid
GSM422132	GSE16837	From Heparinized Venous Blood. 1hr treated with S. aureus strain 10254	Neutrophils	myeloid	not kept	not kept	not kept	myeloid
GSM422133	GSE16837	From Heparinized Venous Blood. 1hr treated with S. aureus strain 10254	Neutrophils	myeloid	not kept	not kept	not kept	myeloid
GSM422134	GSE16837	From Heparinized Venous Blood. 1hr treated with S. aureus strain 11490	Neutrophils	myeloid	not kept	not kept	not kept	myeloid
GSM422135	GSE16837	From Heparinized Venous Blood. 1hr treated with S. aureus strain 11490	Neutrophils	myeloid	not kept	not kept	not kept	myeloid
GSM422136	GSE16837	From Heparinized Venous Blood. 1hr treated with S. aureus strain 11490	Neutrophils	myeloid	not kept	not kept	not kept	myeloid
GSM422137	GSE16837	From Heparinized Venous Blood. 1hr treated with S. aureus strain 11490	Neutrophils	myeloid	not kept	not kept	not kept	myeloid
GSM422138	GSE16837	From Heparinized Venous Blood. 1hr treated with S. aureus strain 252	Neutrophils	myeloid	not kept	not kept	not kept	myeloid
GSM422139	GSE16837	From Heparinized Venous Blood. 1hr treated with S. aureus strain 252	Neutrophils	myeloid	not kept	not kept	not kept	myeloid
GSM422140	GSE16837	From Heparinized Venous Blood. 1hr treated with S. aureus strain 252	Neutrophils	myeloid	not kept	not kept	not kept	myeloid
GSM422141	GSE16837	From Heparinized Venous Blood. 1hr treated with S. aureus strain 252	Neutrophils	myeloid	not kept	not kept	not kept	myeloid
GSM422142	GSE16837	From Heparinized Venous Blood. 1hr treated with S. aureus strain 9897	Neutrophils	myeloid	not kept	not kept	not kept	myeloid
GSM422143	GSE16837	From Heparinized Venous Blood. 1hr treated with S. aureus strain 9897	Neutrophils	myeloid	not kept	not kept	not kept	myeloid
GSM422144	GSE16837	From Heparinized Venous Blood. 1hr treated with S. aureus strain 9897	Neutrophils	myeloid	not kept	not kept	not kept	myeloid
GSM422145	GSE16837	From Heparinized Venous Blood. 1hr treated with S. aureus strain 9897	Neutrophils	myeloid	not kept	not kept	not kept	myeloid
GSM422146	GSE16837	From Heparinized Venous Blood. 1hr treated with latex beads	Neutrophils	myeloid	not kept	not kept	not kept	myeloid
GSM422147	GSE16837	From Heparinized Venous Blood. 1hr treated with latex beads	Neutrophils	myeloid	not kept	not kept	not kept	myeloid
GSM422148	GSE16837	From Heparinized Venous Blood. 1hr treated with latex beads	Neutrophils	myeloid	not kept	not kept	not kept	myeloid
GSM422149	GSE16837	From Heparinized Venous Blood. 1hr treated with latex beads	Neutrophils	myeloid	not kept	not kept	not kept	myeloid
GSM422150	GSE16837	From Heparinized Venous Blood. 2hr treated with S. aureus strain Col	Neutrophils	myeloid	not kept	not kept	not kept	myeloid
GSM422151	GSE16837	From Heparinized Venous Blood. 2hr treated with S. aureus strain Col	Neutrophils	myeloid	not kept	not kept	not kept	myeloid
GSM422152	GSE16837	From Heparinized Venous Blood. 2hr treated with S. aureus strain Col	Neutrophils	myeloid	not kept	not kept	not kept	myeloid
GSM422153	GSE16837	From Heparinized Venous Blood. 2hr control	Neutrophils	myeloid	not kept	not kept	not kept	myeloid
GSM422154	GSE16837	From Heparinized Venous Blood. 2hr control	Neutrophils	myeloid	not kept	not kept	not kept	myeloid
GSM422155	GSE16837	From Heparinized Venous Blood. 2hr control	Neutrophils	myeloid	not kept	not kept	not kept	myeloid
GSM422156	GSE16837	From Heparinized Venous Blood. 2hr control	Neutrophils	myeloid	not kept	not kept	not kept	myeloid
GSM422157	GSE16837	From Heparinized Venous Blood. 2hr treated with S. aureus strain 10254	Neutrophils	myeloid	not kept	not kept	not kept	myeloid
GSM422158	GSE16837	From Heparinized Venous Blood. 2hr treated with S. aureus strain 10254	Neutrophils	myeloid	not kept	not kept	not kept	myeloid
GSM422159	GSE16837	From Heparinized Venous Blood. 2hr treated with S. aureus strain 10254	Neutrophils	myeloid	not kept	not kept	not kept	myeloid
GSM422160	GSE16837	From Heparinized Venous Blood. 2hr treated with S. aureus strain 10254	Neutrophils	myeloid	not kept	not kept	not kept	myeloid
GSM422161	GSE16837	From Heparinized Venous Blood. 2hr treated with S. aureus strain 11490	Neutrophils	myeloid	not kept	not kept	not kept	myeloid
GSM422162	GSE16837	From Heparinized Venous Blood. 2hr treated with S. aureus strain 11490	Neutrophils	myeloid	not kept	not kept	not kept	myeloid
GSM422163	GSE16837	From Heparinized Venous Blood. 2hr treated with S. aureus strain 11490	Neutrophils	myeloid	not kept	not kept	not kept	myeloid
GSM422164	GSE16837	From Heparinized Venous Blood. 2hr treated with S. aureus strain 11490	Neutrophils	myeloid	not kept	not kept	not kept	myeloid
GSM422165	GSE16837	From Heparinized Venous Blood. 2hr treated with S. aureus strain 252	Neutrophils	myeloid	not kept	not kept	not kept	myeloid
GSM422166	GSE16837	From Heparinized Venous Blood. 2hr treated with S. aureus strain 252	Neutrophils	myeloid	not kept	not kept	not kept	myeloid
GSM422167	GSE16837	From Heparinized Venous Blood. 2hr treated with S. aureus strain 252	Neutrophils	myeloid	not kept	not kept	not kept	myeloid
GSM422168	GSE16837	From Heparinized Venous Blood. 2hr treated with S. aureus strain 252	Neutrophils	myeloid	not kept	not kept	not kept	myeloid
GSM422169	GSE16837	From Heparinized Venous Blood. 2hr treated with S. aureus strain 9897	Neutrophils	myeloid	not kept	not kept	not kept	myeloid
GSM422170	GSE16837	From Heparinized Venous Blood. 2hr treated with S. aureus strain 9897	Neutrophils	myeloid	not kept	not kept	not kept	myeloid
GSM422171	GSE16837	From Heparinized Venous Blood. 2hr treated with S. aureus strain 9897	Neutrophils	myeloid	not kept	not kept	not kept	myeloid
GSM422172	GSE16837	From Heparinized Venous Blood. 2hr treated with S. aureus strain 9897	Neutrophils	myeloid	not kept	not kept	not kept	myeloid
GSM422173	GSE16837	From Heparinized Venous Blood. 2hr treated with latex beads	Neutrophils	myeloid	not kept	not kept	not kept	myeloid
GSM422174	GSE16837	From Heparinized Venous Blood. 2hr treated with latex beads	Neutrophils	myeloid	not kept	not kept	not kept	myeloid
GSM422175	GSE16837	From Heparinized Venous Blood. 2hr treated with latex beads	Neutrophils	myeloid	not kept	not kept	not kept	myeloid
GSM422176	GSE16837	From Heparinized Venous Blood. 2hr treated with latex beads	Neutrophils	myeloid	not kept	not kept	not kept	myeloid
GSM422177	GSE16837	From Heparinized Venous Blood. 3hr treated with S. aureus strain Col	Neutrophils	myeloid	not kept	not kept	not kept	myeloid
GSM422178	GSE16837	From Heparinized Venous Blood. 3hr treated with S. aureus strain Col	Neutrophils	myeloid	not kept	not kept	not kept	myeloid
GSM422179	GSE16837	From Heparinized Venous Blood. 3hr treated with S. aureus strain Col	Neutrophils	myeloid	not kept	not kept	not kept	myeloid
GSM422180	GSE16837	From Heparinized Venous Blood. 3hr treated with S. aureus strain Col	Neutrophils	myeloid	not kept	not kept	not kept	myeloid
GSM422181	GSE16837	From Heparinized Venous Blood. 3hr control	Neutrophils	myeloid	not kept	not kept	not kept	myeloid
GSM422182	GSE16837	From Heparinized Venous Blood. 3hr control	Neutrophils	myeloid	not kept	not kept	not kept	myeloid
GSM422183	GSE16837	From Heparinized Venous Blood. 3hr control	Neutrophils	myeloid	not kept	not kept	not kept	myeloid
GSM422184	GSE16837	From Heparinized Venous Blood. 3hr control	Neutrophils	myeloid	not kept	not kept	not kept	myeloid
GSM422185	GSE16837	From Heparinized Venous Blood. 3hr treated with S. aureus strain 10254	Neutrophils	myeloid	not kept	not kept	not kept	myeloid
GSM422186	GSE16837	From Heparinized Venous Blood. 3hr treated with S. aureus strain 10254	Neutrophils	myeloid	not kept	not kept	not kept	myeloid
GSM422187	GSE16837	From Heparinized Venous Blood. 3hr treated with S. aureus strain 10254	Neutrophils	myeloid	not kept	not kept	not kept	myeloid
GSM422188	GSE16837	From Heparinized Venous Blood. 3hr treated with S. aureus strain 10254	Neutrophils	myeloid	not kept	not kept	not kept	myeloid
GSM422189	GSE16837	From Heparinized Venous Blood. 3hr treated with S. aureus strain 11490	Neutrophils	myeloid	not kept	not kept	not kept	myeloid
GSM422190	GSE16837	From Heparinized Venous Blood. 3hr treated with S. aureus strain 11490	Neutrophils	myeloid	not kept	not kept	not kept	myeloid
GSM422191	GSE16837	From Heparinized Venous Blood. 3hr treated with S. aureus strain 11490	Neutrophils	myeloid	not kept	not kept	not kept	myeloid
GSM422192	GSE16837	From Heparinized Venous Blood. 3hr treated with S. aureus strain 11490	Neutrophils	myeloid	not kept	not kept	not kept	myeloid
GSM422193	GSE16837	From Heparinized Venous Blood. 3hr treated with S. aureus strain 252	Neutrophils	myeloid	not kept	not kept	not kept	myeloid
GSM422194	GSE16837	From Heparinized Venous Blood. 3hr treated with S. aureus strain 252	Neutrophils	myeloid	not kept	not kept	not kept	myeloid
GSM422195	GSE16837	From Heparinized Venous Blood. 3hr treated with S. aureus strain 252	Neutrophils	myeloid	not kept	not kept	not kept	myeloid
GSM422196	GSE16837	From Heparinized Venous Blood. 3hr treated with S. aureus strain 9897	Neutrophils	myeloid	not kept	not kept	not kept	myeloid
GSM422197	GSE16837	From Heparinized Venous Blood. 3hr treated with S. aureus strain 9897	Neutrophils	myeloid	not kept	not kept	not kept	myeloid
GSM422198	GSE16837	From Heparinized Venous Blood. 3hr treated with S. aureus strain 9897	Neutrophils	myeloid	not kept	not kept	not kept	myeloid
GSM422199	GSE16837	From Heparinized Venous Blood. 3hr treated with S. aureus strain 9897	Neutrophils	myeloid	not kept	not kept	not kept	myeloid
GSM422200	GSE16837	From Heparinized Venous Blood. 3hr treated with latex beads	Neutrophils	myeloid	not kept	not kept	not kept	myeloid
GSM422201	GSE16837	From Heparinized Venous Blood. 3hr treated with latex beads	Neutrophils	myeloid	not kept	not kept	not kept	myeloid
GSM422202	GSE16837	From Heparinized Venous Blood. 3hr treated with latex beads	Neutrophils	myeloid	not kept	not kept	not kept	myeloid
GSM422203	GSE16837	From Heparinized Venous Blood. 3hr treated with latex beads	Neutrophils	myeloid	not kept	not kept	not kept	myeloid
GSM422204	GSE16837	From Heparinized Venous Blood. 6hr treated with S. aureus strain Col	Neutrophils	myeloid	not kept	not kept	not kept	myeloid
GSM422205	GSE16837	From Heparinized Venous Blood. 6hr treated with S. aureus strain Col	Neutrophils	myeloid	not kept	not kept	not kept	myeloid
GSM422206	GSE16837	From Heparinized Venous Blood. 6hr treated with S. aureus strain Col	Neutrophils	myeloid	not kept	not kept	not kept	myeloid
GSM422207	GSE16837	From Heparinized Venous Blood. 6hr treated with S. aureus strain Col	Neutrophils	myeloid	not kept	not kept	not kept	myeloid
GSM422208	GSE16837	From Heparinized Venous Blood. 6hr control	Neutrophils	myeloid	not kept	not kept	not kept	myeloid
GSM422209	GSE16837	From Heparinized Venous Blood. 6hr control	Neutrophils	myeloid	not kept	not kept	not kept	myeloid
GSM422210	GSE16837	From Heparinized Venous Blood. 6hr control	Neutrophils	myeloid	not kept	not kept	not kept	myeloid
GSM422211	GSE16837	From Heparinized Venous Blood. 6hr control	Neutrophils	myeloid	not kept	not kept	not kept	myeloid
GSM422212	GSE16837	From Heparinized Venous Blood. 6hr treated with S. aureus strain 10254	Neutrophils	myeloid	not kept	not kept	not kept	myeloid
GSM422213	GSE16837	From Heparinized Venous Blood. 6hr treated with S. aureus strain 10254	Neutrophils	myeloid	not kept	not kept	not kept	myeloid
GSM422214	GSE16837	From Heparinized Venous Blood. 6hr treated with S. aureus strain 10254	Neutrophils	myeloid	not kept	not kept	not kept	myeloid
GSM422215	GSE16837	From Heparinized Venous Blood. 6hr treated with S. aureus strain 10254	Neutrophils	myeloid	not kept	not kept	not kept	myeloid
GSM422216	GSE16837	From Heparinized Venous Blood. 6hr treated with S. aureus strain 11490	Neutrophils	myeloid	not kept	not kept	not kept	myeloid
GSM422219	GSE16837	From Heparinized Venous Blood. 6hr treated with S. aureus strain 11490	Neutrophils	myeloid	not kept	not kept	not kept	myeloid
GSM422220	GSE16837	From Heparinized Venous Blood. 6hr treated with S. aureus strain 252	Neutrophils	myeloid	not kept	not kept	not kept	myeloid
GSM422221	GSE16837	From Heparinized Venous Blood. 6hr treated with S. aureus strain 252	Neutrophils	myeloid	not kept	not kept	not kept	myeloid
GSM422222	GSE16837	From Heparinized Venous Blood. 6hr treated with S. aureus strain 252	Neutrophils	myeloid	not kept	not kept	not kept	myeloid
GSM422223	GSE16837	From Heparinized Venous Blood. 6hr treated with S. aureus strain 252	Neutrophils	myeloid	not kept	not kept	not kept	myeloid
GSM422224	GSE16837	From Heparinized Venous Blood. 6hr treated with S. aureus strain 9897	Neutrophils	myeloid	not kept	not kept	not kept	myeloid
GSM422225	GSE16837	From Heparinized Venous Blood. 6hr treated with S. aureus strain 9897	Neutrophils	myeloid	not kept	not kept	not kept	myeloid
GSM422226	GSE16837	From Heparinized Venous Blood. 6hr treated with S. aureus strain 9897	Neutrophils	myeloid	not kept	not kept	not kept	myeloid
GSM422227	GSE16837	From Heparinized Venous Blood. 6hr treated with S. aureus strain 9897	Neutrophils	myeloid	not kept	not kept	not kept	myeloid
GSM422228	GSE16837	From Heparinized Venous Blood. 6hr treated with latex beads	Neutrophils	myeloid	not kept	not kept	not kept	myeloid
GSM422229	GSE16837	From Heparinized Venous Blood. 6hr treated with latex beads	Neutrophils	myeloid	not kept	not kept	not kept	myeloid
GSM422230	GSE16837	From Heparinized Venous Blood. 6hr treated with latex beads	Neutrophils	myeloid	not kept	not kept	not kept	myeloid
GSM466514	GSE18810	From the Whole Blood. Exposed to UPEC 60 min in RPMI media	Neutrophils	myeloid	not kept	not kept	not kept	myeloid
GSM466515	GSE18810	From the Whole Blood. Exposed to UPEC 60 min in RPMI media	Neutrophils	myeloid	not kept	not kept	not kept	myeloid
GSM466516	GSE18810	From the Whole Blood. Exposed to UPEC 60 min in RPMI media	Neutrophils	myeloid	not kept	not kept	not kept	myeloid
GSM466517	GSE18810	From the Whole Blood. Exposed to UPEC 60 min in RPMI media	Neutrophils	myeloid	not kept	not kept	not kept	myeloid
GSM466518	GSE18810	From the Whole Blood. 60 min in RPMI media	Neutrophils	myeloid	not kept	not kept	not kept	myeloid
GSM466519	GSE18810	From the Whole Blood. 60 min in RPMI media	Neutrophils	myeloid	not kept	not kept	not kept	myeloid
GSM705412	GSE28491	PBMC CD4+ kit	CD4 T cells	Lymphoids	Tcells	CD4	not kept	CD4
GSM705413	GSE28491	PBMC CD4+ kit	CD4 T cells	Lymphoids	Tcells	CD4	not kept	CD4
GSM422109	GSE16836	From Peripheral Blood. CD14+.HLA-DR+.CD1c-.CD56-.CD19-.CD3-.CD16b-.CD66b-.CD16-	Monocytes	myeloid	not kept	not kept	not kept	myeloid
GSM422110	GSE16836	From Peripheral Blood. CD14+.HLA-DR+.CD1c-.CD56-.CD19-.CD3-.CD16b-.CD66b-.CD16-	Monocytes	myeloid	not kept	not kept	not kept	myeloid
GSM422111	GSE16836	From Peripheral Blood. CD14+.HLA-DR+.CD1c-.CD56-.CD19-.CD3-.CD16b-.CD66b-.CD16-	Monocytes	myeloid	not kept	not kept	not kept	myeloid
GSM422112	GSE16836	From Peripheral Blood. CD14+.HLA-DR+.CD1c-.CD56-.CD19-.CD3-.CD16b-.CD66b-.CD16-	Monocytes	myeloid	not kept	not kept	not kept	myeloid
GSM422113	GSE16836	From Peripheral Blood. CD14+.HLA-DR+.CD1c-.CD56-.CD19-.CD3-.CD16b-.CD66b-.CD16+	Monocytes	myeloid	not kept	not kept	not kept	myeloid
GSM422114	GSE16836	From Peripheral Blood. CD14+.HLA-DR+.CD1c-.CD56-.CD19-.CD3-.CD16b-.CD66b-.CD16+	Monocytes	myeloid	not kept	not kept	not kept	myeloid
GSM422115	GSE16836	From Peripheral Blood. CD14+.HLA-DR+.CD1c-.CD56-.CD19-.CD3-.CD16b-.CD66b-.CD16+	Monocytes	myeloid	not kept	not kept	not kept	myeloid
GSM422116	GSE16836	From Peripheral Blood. CD14+.HLA-DR+.CD1c-.CD56-.CD19-.CD3-.CD16b-.CD66b-.CD16+	Monocytes	myeloid	not kept	not kept	not kept	myeloid
GSM361266	GSE14465	From Blood. Non Stimulated. 30 Min	Neutrophils	myeloid	not kept	not kept	not kept	myeloid
GSM361272	GSE14465	From Blood. Stimulated 30 Min by LPS, GM-CSF, TNF-a, fMLP and IL-1b	Neutrophils	myeloid	not kept	not kept	not kept	myeloid
GSM361278	GSE14465	From Blood. Stimulated 30 Min by LPS, GM-CSF, TNF-a, fMLP and IL-1b + CGS 21680	Neutrophils	myeloid	not kept	not kept	not kept	myeloid
GSM361283	GSE14465	From Blood. Stimulated 30 Min by LPS, GM-CSF, TNF-a, fMLP and IL-1b + PGE2	Neutrophils	myeloid	not kept	not kept	not kept	myeloid
GSM361285	GSE14465	From Blood. Stimulated 30 Min by LPS, GM-CSF, TNF-a, fMLP and IL-1b + RO 20-1724 and forskolin	Neutrophils	myeloid	not kept	not kept	not kept	myeloid
GSM211011	GSE8507	From Venous Blood.	Neutrophils	myeloid	not kept	not kept	not kept	myeloid
GSM211012	GSE8507	From Venous Blood.	Neutrophils	myeloid	not kept	not kept	not kept	myeloid
GSM211013	GSE8507	From Venous Blood.	Neutrophils	myeloid	not kept	not kept	not kept	myeloid
GSM211014	GSE8507	From Venous Blood.	Neutrophils	myeloid	not kept	not kept	not kept	myeloid
GSM211015	GSE8507	From Venous Blood.	Neutrophils	myeloid	not kept	not kept	not kept	myeloid
GSM211016	GSE8507	From Venous Blood.Treated with IgG-coated latex beads 180min	Neutrophils	myeloid	not kept	not kept	not kept	myeloid
GSM211017	GSE8507	From Venous Blood.Treated with IgG-coated latex beads 180min	Neutrophils	myeloid	not kept	not kept	not kept	myeloid
GSM211018	GSE8507	From Venous Blood.Treated with IgG-coated latex beads 180min	Neutrophils	myeloid	not kept	not kept	not kept	myeloid
GSM211019	GSE8507	From Venous Blood.Treated with IgG-coated latex beads 180min	Neutrophils	myeloid	not kept	not kept	not kept	myeloid
GSM211020	GSE8507	From Venous Blood.Treated with IgG-coated latex beads 180min	Neutrophils	myeloid	not kept	not kept	not kept	myeloid
GSM211021	GSE8507	From Venous Blood.Control 180min	Neutrophils	myeloid	not kept	not kept	not kept	myeloid
GSM211022	GSE8507	From Venous Blood.Control 180min	Neutrophils	myeloid	not kept	not kept	not kept	myeloid
GSM211023	GSE8507	From Venous Blood.Control 180min	Neutrophils	myeloid	not kept	not kept	not kept	myeloid
GSM211024	GSE8507	From Venous Blood.Control 180min	Neutrophils	myeloid	not kept	not kept	not kept	myeloid
GSM211025	GSE8507	From Venous Blood.Control 180min	Neutrophils	myeloid	not kept	not kept	not kept	myeloid
GSM211026	GSE8507	From Venous Blood.Treated with IgG-coated latex beads 360min	Neutrophils	myeloid	not kept	not kept	not kept	myeloid
GSM211027	GSE8507	From Venous Blood.Treated with IgG-coated latex beads 360min	Neutrophils	myeloid	not kept	not kept	not kept	myeloid
GSM211028	GSE8507	From Venous Blood.Treated with IgG-coated latex beads 360min	Neutrophils	myeloid	not kept	not kept	not kept	myeloid
GSM211029	GSE8507	From Venous Blood.Treated with IgG-coated latex beads 360min	Neutrophils	myeloid	not kept	not kept	not kept	myeloid
GSM211030	GSE8507	From Venous Blood.Treated with IgG-coated latex beads 360min	Neutrophils	myeloid	not kept	not kept	not kept	myeloid
GSM211031	GSE8507	From Venous Blood.Control 360min	Neutrophils	myeloid	not kept	not kept	not kept	myeloid
GSM211032	GSE8507	From Venous Blood.Control 360min	Neutrophils	myeloid	not kept	not kept	not kept	myeloid
GSM211033	GSE8507	From Venous Blood.Control 360min	Neutrophils	myeloid	not kept	not kept	not kept	myeloid
GSM211034	GSE8507	From Venous Blood.Control 360min	Neutrophils	myeloid	not kept	not kept	not kept	myeloid
GSM211035	GSE8507	From Venous Blood.Control 360min	Neutrophils	myeloid	not kept	not kept	not kept	myeloid
GSM211036	GSE8507	From Venous Blood.Control 0min	Neutrophils	myeloid	not kept	not kept	not kept	myeloid
GSM211037	GSE8507	From Venous Blood.Control 0min	Neutrophils	myeloid	not kept	not kept	not kept	myeloid
GSM211038	GSE8507	From Venous Blood.Control 0min	Neutrophils	myeloid	not kept	not kept	not kept	myeloid
GSM211039	GSE8507	From Venous Blood.Control 0min	Neutrophils	myeloid	not kept	not kept	not kept	myeloid
GSM211040	GSE8507	From Venous Blood.Control 0min	Neutrophils	myeloid	not kept	not kept	not kept	myeloid
GSM211041	GSE8507	From Venous Blood.Treated with IgG-coated latex beads 180min	Neutrophils	myeloid	not kept	not kept	not kept	myeloid
GSM211042	GSE8507	From Venous Blood.Treated with IgG-coated latex beads 180min	Neutrophils	myeloid	not kept	not kept	not kept	myeloid
GSM211043	GSE8507	From Venous Blood.Treated with IgG-coated latex beads 180min	Neutrophils	myeloid	not kept	not kept	not kept	myeloid
GSM211044	GSE8507	From Venous Blood.Treated with IgG-coated latex beads 180min	Neutrophils	myeloid	not kept	not kept	not kept	myeloid
GSM211045	GSE8507	From Venous Blood.Treated with IgG-coated latex beads 180min	Neutrophils	myeloid	not kept	not kept	not kept	myeloid
GSM211046	GSE8507	From Venous Blood.Control 180min	Neutrophils	myeloid	not kept	not kept	not kept	myeloid
GSM211047	GSE8507	From Venous Blood.Control 180min	Neutrophils	myeloid	not kept	not kept	not kept	myeloid
GSM211048	GSE8507	From Venous Blood.Control 180min	Neutrophils	myeloid	not kept	not kept	not kept	myeloid
GSM211049	GSE8507	From Venous Blood.Control 180min	Neutrophils	myeloid	not kept	not kept	not kept	myeloid
GSM211050	GSE8507	From Venous Blood.Control 180min	Neutrophils	myeloid	not kept	not kept	not kept	myeloid
GSM211051	GSE8507	From Venous Blood.Treated with IgG-coated latex beads 360min	Neutrophils	myeloid	not kept	not kept	not kept	myeloid
GSM211052	GSE8507	From Venous Blood.Treated with IgG-coated latex beads 360min	Neutrophils	myeloid	not kept	not kept	not kept	myeloid
GSM211053	GSE8507	From Venous Blood.Treated with IgG-coated latex beads 360min	Neutrophils	myeloid	not kept	not kept	not kept	myeloid
GSM211054	GSE8507	From Venous Blood.Treated with IgG-coated latex beads 360min	Neutrophils	myeloid	not kept	not kept	not kept	myeloid
GSM211055	GSE8507	From Venous Blood.Treated with IgG-coated latex beads 360min	Neutrophils	myeloid	not kept	not kept	not kept	myeloid
GSM211056	GSE8507	From Venous Blood.Control 360min	Neutrophils	myeloid	not kept	not kept	not kept	myeloid
GSM211057	GSE8507	From Venous Blood.Control 360min	Neutrophils	myeloid	not kept	not kept	not kept	myeloid
GSM211058	GSE8507	From Venous Blood.Control 360min	Neutrophils	myeloid	not kept	not kept	not kept	myeloid
GSM211059	GSE8507	From Venous Blood.Control 360min	Neutrophils	myeloid	not kept	not kept	not kept	myeloid
GSM211060	GSE8507	From Venous Blood.Control 360min	Neutrophils	myeloid	not kept	not kept	not kept	myeloid
GSM211061	GSE8507	From Venous Blood.Control 0min	Neutrophils	myeloid	not kept	not kept	not kept	myeloid
GSM211062	GSE8507	From Venous Blood.Control 0min	Neutrophils	myeloid	not kept	not kept	not kept	myeloid
GSM211063	GSE8507	From Venous Blood.Control 0min	Neutrophils	myeloid	not kept	not kept	not kept	myeloid
GSM211064	GSE8507	From Venous Blood.Control 0min	Neutrophils	myeloid	not kept	not kept	not kept	myeloid
GSM211065	GSE8507	From Venous Blood.Treated with IgG-coated latex beads 180min	Neutrophils	myeloid	not kept	not kept	not kept	myeloid
GSM211066	GSE8507	From Venous Blood.Treated with IgG-coated latex beads 180min	Neutrophils	myeloid	not kept	not kept	not kept	myeloid
GSM211067	GSE8507	From Venous Blood.Treated with IgG-coated latex beads 180min	Neutrophils	myeloid	not kept	not kept	not kept	myeloid
GSM211068	GSE8507	From Venous Blood.Treated with IgG-coated latex beads 180min	Neutrophils	myeloid	not kept	not kept	not kept	myeloid
GSM211069	GSE8507	From Venous Blood.Control 180min	Neutrophils	myeloid	not kept	not kept	not kept	myeloid
GSM211070	GSE8507	From Venous Blood.Control 180min	Neutrophils	myeloid	not kept	not kept	not kept	myeloid
GSM211071	GSE8507	From Venous Blood.Control 180min	Neutrophils	myeloid	not kept	not kept	not kept	myeloid
GSM211072	GSE8507	From Venous Blood.Control 180min	Neutrophils	myeloid	not kept	not kept	not kept	myeloid
GSM211073	GSE8507	From Venous Blood.Treated with IgG-coated latex beads 360min	Neutrophils	myeloid	not kept	not kept	not kept	myeloid
GSM211074	GSE8507	From Venous Blood.Treated with IgG-coated latex beads 360min	Neutrophils	myeloid	not kept	not kept	not kept	myeloid
GSM211075	GSE8507	From Venous Blood.Treated with IgG-coated latex beads 360min	Neutrophils	myeloid	not kept	not kept	not kept	myeloid
GSM211076	GSE8507	From Venous Blood.Treated with IgG-coated latex beads 360min	Neutrophils	myeloid	not kept	not kept	not kept	myeloid
GSM211077	GSE8507	From Venous Blood.Control 360min	Neutrophils	myeloid	not kept	not kept	not kept	myeloid
GSM211078	GSE8507	From Venous Blood.Control 360min	Neutrophils	myeloid	not kept	not kept	not kept	myeloid
GSM211079	GSE8507	From Venous Blood.Control 360min	Neutrophils	myeloid	not kept	not kept	not kept	myeloid
GSM211080	GSE8507	From Venous Blood.Control 360min	Neutrophils	myeloid	not kept	not kept	not kept	myeloid
GSM211081	GSE8507	From Venous Blood.Control 0min	Neutrophils	myeloid	not kept	not kept	not kept	myeloid
GSM211082	GSE8507	From Venous Blood.Control 0min	Neutrophils	myeloid	not kept	not kept	not kept	myeloid
GSM211083	GSE8507	From Venous Blood.Control 0min	Neutrophils	myeloid	not kept	not kept	not kept	myeloid
GSM211084	GSE8507	From Venous Blood.Control 0min	Neutrophils	myeloid	not kept	not kept	not kept	myeloid
GSM211085	GSE8507	From Venous Blood.Treated with IgG-coated latex beads 180min	Neutrophils	myeloid	not kept	not kept	not kept	myeloid
GSM211086	GSE8507	From Venous Blood.Treated with IgG-coated latex beads 180min	Neutrophils	myeloid	not kept	not kept	not kept	myeloid
GSM211087	GSE8507	From Venous Blood.Treated with IgG-coated latex beads 180min	Neutrophils	myeloid	not kept	not kept	not kept	myeloid
GSM211088	GSE8507	From Venous Blood.Treated with IgG-coated latex beads 180min	Neutrophils	myeloid	not kept	not kept	not kept	myeloid
GSM211089	GSE8507	From Venous Blood.Control 180min	Neutrophils	myeloid	not kept	not kept	not kept	myeloid
GSM211090	GSE8507	From Venous Blood.Control 180min	Neutrophils	myeloid	not kept	not kept	not kept	myeloid
GSM211091	GSE8507	From Venous Blood.Control 180min	Neutrophils	myeloid	not kept	not kept	not kept	myeloid
GSM211092	GSE8507	From Venous Blood.Control 180min	Neutrophils	myeloid	not kept	not kept	not kept	myeloid
GSM211093	GSE8507	From Venous Blood.Treated with IgG-coated latex beads 360min	Neutrophils	myeloid	not kept	not kept	not kept	myeloid
GSM211094	GSE8507	From Venous Blood.Treated with IgG-coated latex beads 360min	Neutrophils	myeloid	not kept	not kept	not kept	myeloid
GSM211095	GSE8507	From Venous Blood.Treated with IgG-coated latex beads 360min	Neutrophils	myeloid	not kept	not kept	not kept	myeloid
GSM211096	GSE8507	From Venous Blood.Treated with IgG-coated latex beads 360min	Neutrophils	myeloid	not kept	not kept	not kept	myeloid
GSM211097	GSE8507	From Venous Blood.Control 360min	Neutrophils	myeloid	not kept	not kept	not kept	myeloid
GSM211098	GSE8507	From Venous Blood.Control 360min	Neutrophils	myeloid	not kept	not kept	not kept	myeloid
GSM211099	GSE8507	From Venous Blood.Control 360min	Neutrophils	myeloid	not kept	not kept	not kept	myeloid
GSM211100	GSE8507	From Venous Blood.Control 360min	Neutrophils	myeloid	not kept	not kept	not kept	myeloid
GSM189447	GSE7807	CD14+	Monocytes	myeloid	not kept	not kept	not kept	myeloid
GSM189448	GSE7807	CD14+	Monocytes	myeloid	not kept	not kept	not kept	myeloid
GSM189449	GSE7807	CD14+	Monocytes	myeloid	not kept	not kept	not kept	myeloid
GSM189450	GSE7807	CD14+	Monocytes	myeloid	not kept	not kept	not kept	myeloid
GSM189451	GSE7807	CD14+.Stimulated with LTD4 for 30 min	Monocytes	myeloid	not kept	not kept	not kept	myeloid
GSM189452	GSE7807	CD14+.Stimulated with LTD4 for 30 min	Monocytes	myeloid	not kept	not kept	not kept	myeloid
GSM189453	GSE7807	CD14+.Stimulated with LTD4 for 30 min	Monocytes	myeloid	not kept	not kept	not kept	myeloid
GSM189454	GSE7807	CD14+.Stimulated with LTD4 for 30 min	Monocytes	myeloid	not kept	not kept	not kept	myeloid
GSM705415	GSE28491	PBMC CD4+ kit	CD4 T cells	Lymphoids	Tcells	CD4	not kept	CD4
GSM705416	GSE28491	PBMC CD4+ kit	CD4 T cells	Lymphoids	Tcells	CD4	not kept	CD4
GSM705417	GSE28491	PBMC CD8+ kit	CD8 T cells	Lymphoids	Tcells	CD8	not kept	CD8
GSM705418	GSE28491	PBMC CD8+ kit	CD8 T cells	Lymphoids	Tcells	CD8	not kept	CD8
GSM705419	GSE28491	PBMC CD8+ kit	CD8 T cells	Lymphoids	Tcells	CD8	not kept	CD8
GSM705420	GSE28491	PBMC CD8+ kit	CD8 T cells	Lymphoids	Tcells	CD8	not kept	CD8
GSM705421	GSE28491	PBMC CD8+ kit	CD8 T cells	Lymphoids	Tcells	CD8	not kept	CD8
GSM705425	GSE28491	PBMC CD56+ kit	NK cells	Lymphoids	Nkcells	not kept	not kept	Nkcells
GSM140953	GSE6090	From Buffy Coat.CD1c+	Dendritic cells	myeloid	not kept	not kept	not kept	CD4
GSM140968	GSE6090	From Buffy Coat.CD1c+	Dendritic cells	myeloid	not kept	not kept	not kept	CD4
GSM140969	GSE6090	From Buffy Coat.CD1c+	Dendritic cells	myeloid	not kept	not kept	not kept	CD4
GSM140970	GSE6090	From Buffy Coat.CD1c+.Stimulated by IL-4 and GM-CSF	Dendritic cells	myeloid	not kept	not kept	not kept	CD4
GSM140971	GSE6090	From Buffy Coat.CD1c+.Stimulated by IL-4 and GM-CSF	Dendritic cells	myeloid	not kept	not kept	not kept	CD4
GSM140973	GSE6090	From Buffy Coat.CD1c+.Stimulated by IL-4 and GM-CSF	Dendritic cells	myeloid	not kept	not kept	not kept	CD4
GSM160530	GSE6965	From Buffy Coat blood of healthy donors.Cultivated in medium for 6h.	Immature Dendritic cells	myeloid	not kept	not kept	not kept	CD4
GSM160534	GSE6965	From Buffy Coat blood of healthy donors.Cultivated in medium for 6h.	Immature Dendritic cells	myeloid	not kept	not kept	not kept	CD4
GSM989635	GSE40268	From PBMC. CD14+. IFNalpha1 3 days.	Dendritic cells	myeloid	not kept	not kept	not kept	CD4
GSM989636	GSE40268	From PBMC. CD14+. IFNalpha2 3 days.	Dendritic cells	myeloid	not kept	not kept	not kept	CD4
GSM989637	GSE40268	From PBMC. CD14+. IFNalpha8 3 days.	Dendritic cells	myeloid	not kept	not kept	not kept	CD4
GSM989638	GSE40268	From PBMC. CD14+. IFNalpha21 3 days.	Dendritic cells	myeloid	not kept	not kept	not kept	CD4
GSM989639	GSE40268	From PBMC. CD14+. IFNbeta 3 days.	Dendritic cells	myeloid	not kept	not kept	not kept	CD4
GSM560538	GSE22589	From buffy coats of adult peripheral blood.CD14+	Dendritic cells	myeloid	not kept	not kept	not kept	CD4
GSM560539	GSE22589	From buffy coats of adult peripheral blood.CD14+	Dendritic cells	myeloid	not kept	not kept	not kept	CD4
GSM705426	GSE28491	PBMC CD56+ kit	NK cells	Lymphoids	Nkcells	not kept	not kept	Nkcells
GSM705427	GSE28491	PBMC CD56+ kit	NK cells	Lymphoids	Nkcells	not kept	not kept	Nkcells
GSM705428	GSE28491	PBMC CD56+ kit	NK cells	Lymphoids	Nkcells	not kept	not kept	Nkcells
GSM705429	GSE28491	PBMC CD56+ kit	NK cells	Lymphoids	Nkcells	not kept	not kept	Nkcells
GSM723815	GSE11292	CD4+ CD25hi + aCD3 a CD28 IL2 t(min) = 0	Canonical CD4 Treg cells	Lymphoids	Tcells	CD4	not kept	CD4
GSM723816	GSE11292	CD4+ CD25hi + aCD3 a CD28 IL2 t(min) = 20	Canonical CD4 Treg cells	Lymphoids	Tcells	CD4	not kept	CD4
GSM723817	GSE11292	CD4+ CD25hi + aCD3 a CD28 IL2 t(min) = 40	Canonical CD4 Treg cells	Lymphoids	Tcells	CD4	not kept	CD4
GSM723818	GSE11292	CD4+ CD25hi + aCD3 a CD28 IL2 t(min) = 60	Canonical CD4 Treg cells	Lymphoids	Tcells	CD4	not kept	CD4
GSM723819	GSE11292	CD4+ CD25hi + aCD3 a CD28 IL2 t(min) = 80	Canonical CD4 Treg cells	Lymphoids	Tcells	CD4	not kept	CD4
GSM723820	GSE11292	CD4+ CD25hi + aCD3 a CD28 IL2 t(min) = 100	Canonical CD4 Treg cells	Lymphoids	Tcells	CD4	not kept	CD4
GSM723821	GSE11292	CD4+ CD25hi + aCD3 a CD28 IL2 t(min) = 120	Canonical CD4 Treg cells	Lymphoids	Tcells	CD4	not kept	CD4
GSM723822	GSE11292	CD4+ CD25hi + aCD3 a CD28 IL2 t(min) = 140	Canonical CD4 Treg cells	Lymphoids	Tcells	CD4	not kept	CD4
GSM723823	GSE11292	CD4+ CD25hi + aCD3 a CD28 IL2 t(min) = 160	Canonical CD4 Treg cells	Lymphoids	Tcells	CD4	not kept	CD4
GSM723824	GSE11292	CD4+ CD25hi + aCD3 a CD28 IL2 t(min) = 180	Canonical CD4 Treg cells	Lymphoids	Tcells	CD4	not kept	CD4
GSM723825	GSE11292	CD4+ CD25hi + aCD3 a CD28 IL2 t(min) = 200	Canonical CD4 Treg cells	Lymphoids	Tcells	CD4	not kept	CD4
GSM723826	GSE11292	CD4+ CD25hi + aCD3 a CD28 IL2 t(min) = 220	Canonical CD4 Treg cells	Lymphoids	Tcells	CD4	not kept	CD4
GSM723827	GSE11292	CD4+ CD25hi + aCD3 a CD28 IL2 t(min) = 240	Canonical CD4 Treg cells	Lymphoids	Tcells	CD4	not kept	CD4
GSM723828	GSE11292	CD4+ CD25hi + aCD3 a CD28 IL2 t(min) = 260	Canonical CD4 Treg cells	Lymphoids	Tcells	CD4	not kept	CD4
GSM723829	GSE11292	CD4+ CD25hi + aCD3 a CD28 IL2 t(min) = 280	Canonical CD4 Treg cells	Lymphoids	Tcells	CD4	not kept	CD4
GSM723830	GSE11292	CD4+ CD25hi + aCD3 a CD28 IL2 t(min) = 300	Canonical CD4 Treg cells	Lymphoids	Tcells	CD4	not kept	CD4
GSM723831	GSE11292	CD4+ CD25hi + aCD3 a CD28 IL2 t(min) = 320	Canonical CD4 Treg cells	Lymphoids	Tcells	CD4	not kept	CD4
GSM723832	GSE11292	CD4+ CD25hi + aCD3 a CD28 IL2 t(min) = 340	Canonical CD4 Treg cells	Lymphoids	Tcells	CD4	not kept	CD4
GSM723833	GSE11292	CD4+ CD25hi + aCD3 a CD28 IL2 t(min) = 360	Canonical CD4 Treg cells	Lymphoids	Tcells	CD4	not kept	CD4
GSM723834	GSE11292	CD4+ CD25- + aCD3 a CD28 IL2 t(min) = 0	CD4 T cells	Lymphoids	Tcells	CD4	not kept	CD4
GSM723835	GSE11292	CD4+ CD25- + aCD3 a CD28 IL2 t(min) = 20	CD4 T cells	Lymphoids	Tcells	CD4	not kept	CD4
GSM723836	GSE11292	CD4+ CD25- + aCD3 a CD28 IL2 t(min) = 40	CD4 T cells	Lymphoids	Tcells	CD4	not kept	CD4
GSM723837	GSE11292	CD4+ CD25- + aCD3 a CD28 IL2 t(min) = 60	CD4 T cells	Lymphoids	Tcells	CD4	not kept	CD4
GSM723838	GSE11292	CD4+ CD25- + aCD3 a CD28 IL2 t(min) = 80	CD4 T cells	Lymphoids	Tcells	CD4	not kept	CD4
GSM723839	GSE11292	CD4+ CD25- + aCD3 a CD28 IL2 t(min) = 100	CD4 T cells	Lymphoids	Tcells	CD4	not kept	CD4
GSM723840	GSE11292	CD4+ CD25- + aCD3 a CD28 IL2 t(min) = 120	CD4 T cells	Lymphoids	Tcells	CD4	not kept	CD4
GSM723841	GSE11292	CD4+ CD25- + aCD3 a CD28 IL2 t(min) = 140	CD4 T cells	Lymphoids	Tcells	CD4	not kept	CD4
GSM723842	GSE11292	CD4+ CD25- + aCD3 a CD28 IL2 t(min) = 160	CD4 T cells	Lymphoids	Tcells	CD4	not kept	CD4
GSM723843	GSE11292	CD4+ CD25- + aCD3 a CD28 IL2 t(min) = 180	CD4 T cells	Lymphoids	Tcells	CD4	not kept	CD4
GSM723844	GSE11292	CD4+ CD25- + aCD3 a CD28 IL2 t(min) = 200	CD4 T cells	Lymphoids	Tcells	CD4	not kept	CD4
GSM723845	GSE11292	CD4+ CD25- + aCD3 a CD28 IL2 t(min) = 220	CD4 T cells	Lymphoids	Tcells	CD4	not kept	CD4
GSM723846	GSE11292	CD4+ CD25- + aCD3 a CD28 IL2 t(min) = 240	CD4 T cells	Lymphoids	Tcells	CD4	not kept	CD4
GSM723847	GSE11292	CD4+ CD25- + aCD3 a CD28 IL2 t(min) = 260	CD4 T cells	Lymphoids	Tcells	CD4	not kept	CD4
GSM723848	GSE11292	CD4+ CD25- + aCD3 a CD28 IL2 t(min) = 280	CD4 T cells	Lymphoids	Tcells	CD4	not kept	CD4
GSM723849	GSE11292	CD4+ CD25- + aCD3 a CD28 IL2 t(min) = 300	CD4 T cells	Lymphoids	Tcells	CD4	not kept	CD4
GSM723850	GSE11292	CD4+ CD25- + aCD3 a CD28 IL2 t(min) = 320	CD4 T cells	Lymphoids	Tcells	CD4	not kept	CD4
GSM723851	GSE11292	CD4+ CD25- + aCD3 a CD28 IL2 t(min) = 340	CD4 T cells	Lymphoids	Tcells	CD4	not kept	CD4
GSM723852	GSE11292	CD4+ CD25- + aCD3 a CD28 IL2 t(min) = 360	CD4 T cells	Lymphoids	Tcells	CD4	not kept	CD4
GSM723853	GSE11292	CD4+ CD25- + aCD3 a CD28 IL2 t(min) = 0	CD4 T cells	Lymphoids	Tcells	CD4	not kept	CD4
GSM723854	GSE11292	CD4+ CD25- + aCD3 a CD28 IL2 t(min) = 20	CD4 T cells	Lymphoids	Tcells	CD4	not kept	CD4
GSM723855	GSE11292	CD4+ CD25- + aCD3 a CD28 IL2 t(min) = 40	CD4 T cells	Lymphoids	Tcells	CD4	not kept	CD4
GSM723856	GSE11292	CD4+ CD25- + aCD3 a CD28 IL2 t(min) = 60	CD4 T cells	Lymphoids	Tcells	CD4	not kept	CD4
GSM723857	GSE11292	CD4+ CD25- + aCD3 a CD28 IL2 t(min) = 80	CD4 T cells	Lymphoids	Tcells	CD4	not kept	CD4
GSM723858	GSE11292	CD4+ CD25- + aCD3 a CD28 IL2 t(min) = 100	CD4 T cells	Lymphoids	Tcells	CD4	not kept	CD4
GSM723859	GSE11292	CD4+ CD25- + aCD3 a CD28 IL2 t(min) = 120	CD4 T cells	Lymphoids	Tcells	CD4	not kept	CD4
GSM723860	GSE11292	CD4+ CD25- + aCD3 a CD28 IL2 t(min) = 140	CD4 T cells	Lymphoids	Tcells	CD4	not kept	CD4
GSM723861	GSE11292	CD4+ CD25- + aCD3 a CD28 IL2 t(min) = 160	CD4 T cells	Lymphoids	Tcells	CD4	not kept	CD4
GSM723862	GSE11292	CD4+ CD25- + aCD3 a CD28 IL2 t(min) = 180	CD4 T cells	Lymphoids	Tcells	CD4	not kept	CD4
GSM723863	GSE11292	CD4+ CD25- + aCD3 a CD28 IL2 t(min) = 200	CD4 T cells	Lymphoids	Tcells	CD4	not kept	CD4
GSM723864	GSE11292	CD4+ CD25- + aCD3 a CD28 IL2 t(min) = 220	CD4 T cells	Lymphoids	Tcells	CD4	not kept	CD4
GSM723865	GSE11292	CD4+ CD25- + aCD3 a CD28 IL2 t(min) = 240	CD4 T cells	Lymphoids	Tcells	CD4	not kept	CD4
GSM723866	GSE11292	CD4+ CD25- + aCD3 a CD28 IL2 t(min) = 260	CD4 T cells	Lymphoids	Tcells	CD4	not kept	CD4
GSM723867	GSE11292	CD4+ CD25- + aCD3 a CD28 IL2 t(min) = 280	CD4 T cells	Lymphoids	Tcells	CD4	not kept	CD4
GSM723868	GSE11292	CD4+ CD25- + aCD3 a CD28 IL2 t(min) = 300	CD4 T cells	Lymphoids	Tcells	CD4	not kept	CD4
GSM128966	GSE5547	From Peripheral Blood HLA-DR+ CD86+ CD40+ CD3- CD14- and CD19-	Dendritic cells	myeloid	not kept	not kept	not kept	CD4
GSM128967	GSE5547	From Peripheral Blood HLA-DR+ CD86+ CD40+ CD3- CD14- and CD19-	Dendritic cells	myeloid	not kept	not kept	not kept	CD4
GSM128968	GSE5547	From Peripheral Blood HLA-DR+ CD86+ CD40+ CD3- CD14- and CD19-	Dendritic cells	myeloid	not kept	not kept	not kept	CD4
GSM128969	GSE5547	From Peripheral Blood HLA-DR+ CD86+ CD40+ CD3- CD14- and CD19- Stimulated by H ducreyi	Dendritic cells	myeloid	not kept	not kept	not kept	CD4
GSM128970	GSE5547	From Peripheral Blood HLA-DR+ CD86+ CD40+ CD3- CD14- and CD19- Stimulated by H ducreyi	Dendritic cells	myeloid	not kept	not kept	not kept	CD4
GSM128971	GSE5547	From Peripheral Blood HLA-DR+ CD86+ CD40+ CD3- CD14- and CD19- Stimulated by H ducreyi	Dendritic cells	myeloid	not kept	not kept	not kept	CD4
GSM128972	GSE5547	From Peripheral Blood HLA-DR+ CD86+ CD40+ CD3- CD14- and CD19-	Dendritic cells	myeloid	not kept	not kept	not kept	CD4
GSM128973	GSE5547	From Peripheral Blood HLA-DR+ CD86+ CD40+ CD3- CD14- and CD19-	Dendritic cells	myeloid	not kept	not kept	not kept	myeloid
GSM128974	GSE5547	From Peripheral Blood HLA-DR+ CD86+ CD40+ CD3- CD14- and CD19-	Dendritic cells	myeloid	not kept	not kept	not kept	myeloid
GSM128975	GSE5547	From Peripheral Blood HLA-DR+ CD86+ CD40+ CD3- CD14- and CD19- Stimulated by H ducreyi	Dendritic cells	myeloid	not kept	not kept	not kept	myeloid
GSM128976	GSE5547	From Peripheral Blood HLA-DR+ CD86+ CD40+ CD3- CD14- and CD19- Stimulated by H ducreyi	Dendritic cells	myeloid	not kept	not kept	not kept	myeloid
GSM128977	GSE5547	From Peripheral Blood HLA-DR+ CD86+ CD40+ CD3- CD14- and CD19- Stimulated by H ducreyi	Dendritic cells	myeloid	not kept	not kept	not kept	myeloid
GSM723869	GSE11292	CD4+ CD25- + aCD3 a CD28 IL2 t(min) = 320	CD4 T cells	Lymphoids	Tcells	CD4	not kept	CD4
GSM723870	GSE11292	CD4+ CD25- + aCD3 a CD28 IL2 t(min) = 340	CD4 T cells	Lymphoids	Tcells	CD4	not kept	CD4
GSM723871	GSE11292	CD4+ CD25- + aCD3 a CD28 IL2 t(min) = 360	CD4 T cells	Lymphoids	Tcells	CD4	not kept	CD4
GSM746743	GSE30153	PBMC CD19+	B cells	Lymphoids	Bcells	not kept	not kept	Bcells
GSM746744	GSE30153	PBMC CD19+	B cells	Lymphoids	Bcells	not kept	not kept	Bcells
GSM746745	GSE30153	PBMC CD19+	B cells	Lymphoids	Bcells	not kept	not kept	Bcells
GSM746746	GSE30153	PBMC CD19+	B cells	Lymphoids	Bcells	not kept	not kept	Bcells
GSM746747	GSE30153	PBMC CD19+	B cells	Lymphoids	Bcells	not kept	not kept	Bcells
GSM746748	GSE30153	PBMC CD19+	B cells	Lymphoids	Bcells	not kept	not kept	Bcells
GSM746750	GSE30153	PBMC CD19+	B cells	Lymphoids	Bcells	not kept	not kept	Bcells
GSM746751	GSE30153	PBMC CD19+	B cells	Lymphoids	Bcells	not kept	not kept	Bcells
GSM746752	GSE30153	PBMC CD19+	B cells	Lymphoids	Bcells	not kept	not kept	Bcells
GSM816001	GSE32959	Cord blood Activated CD4+ 12h	CD4 T cells	Lymphoids	Tcells	CD4	not kept	CD4
GSM816002	GSE32959	Cord blood Activated CD4+ 12h	CD4 T cells	Lymphoids	Tcells	CD4	not kept	CD4
GSM816003	GSE32959	Cord blood Activated CD4+ 12h	CD4 T cells	Lymphoids	Tcells	CD4	not kept	CD4
GSM816004	GSE32959	Cord blood Activated CD4+ 24h	CD4 T cells	Lymphoids	Tcells	CD4	not kept	CD4
GSM816005	GSE32959	Cord blood Activated CD4+ 24h	CD4 T cells	Lymphoids	Tcells	CD4	not kept	CD4
GSM816006	GSE32959	Cord blood Activated CD4+ 24h	CD4 T cells	Lymphoids	Tcells	CD4	not kept	CD4
GSM816007	GSE32959	Cord blood Activated CD4+ 48h	CD4 T cells	Lymphoids	Tcells	CD4	not kept	CD4
GSM816008	GSE32959	Cord blood Activated CD4+ 48h	CD4 T cells	Lymphoids	Tcells	CD4	not kept	CD4
GSM816009	GSE32959	Cord blood Activated CD4+ 48h	CD4 T cells	Lymphoids	Tcells	CD4	not kept	CD4
GSM816010	GSE32959	Cord blood Activated CD4+ 72h	CD4 T cells	Lymphoids	Tcells	CD4	not kept	CD4
GSM816011	GSE32959	Cord blood Activated CD4+ 72h	CD4 T cells	Lymphoids	Tcells	CD4	not kept	CD4
GSM816012	GSE32959	Cord blood Activated CD4+ 12h + IL12	Th1	Lymphoids	Tcells	CD4	not kept	CD4
GSM816013	GSE32959	Cord blood Activated CD4+ 12h + IL12	Th1	Lymphoids	Tcells	CD4	not kept	CD4
GSM816014	GSE32959	Cord blood Activated CD4+ 12h + IL12	Th1	Lymphoids	Tcells	CD4	not kept	CD4
GSM816015	GSE32959	Cord blood Activated CD4+ 24h + IL12	Th1	Lymphoids	Tcells	CD4	not kept	CD4
GSM816016	GSE32959	Cord blood Activated CD4+ 24h + IL12	Th1	Lymphoids	Tcells	CD4	not kept	CD4
GSM816017	GSE32959	Cord blood Activated CD4+ 24h + IL12	Th1	Lymphoids	Tcells	CD4	not kept	CD4
GSM816018	GSE32959	Cord blood Activated CD4+ 48h + IL12	Th1	Lymphoids	Tcells	CD4	not kept	CD4
GSM816019	GSE32959	Cord blood Activated CD4+ 48h + IL12	Th1	Lymphoids	Tcells	CD4	not kept	CD4
GSM816020	GSE32959	Cord blood Activated CD4+ 48h + IL12	Th1	Lymphoids	Tcells	CD4	not kept	CD4
GSM816021	GSE32959	Cord blood Activated CD4+ 72h + IL12	Th1	Lymphoids	Tcells	CD4	not kept	CD4
GSM816022	GSE32959	Cord blood Activated CD4+ 72h + IL12	Th1	Lymphoids	Tcells	CD4	not kept	CD4
GSM816023	GSE32959	Cord blood Activated CD4+ 12h + IL4	Th2	Lymphoids	Tcells	CD4	not kept	CD4
GSM816024	GSE32959	Cord blood Activated CD4+ 12h + IL4	Th2	Lymphoids	Tcells	CD4	not kept	CD4
GSM816025	GSE32959	Cord blood Activated CD4+ 12h + IL4	Th2	Lymphoids	Tcells	CD4	not kept	CD4
GSM816026	GSE32959	Cord blood Activated CD4+ 24h + IL4	Th2	Lymphoids	Tcells	CD4	not kept	CD4
GSM816027	GSE32959	Cord blood Activated CD4+ 24h + IL4	Th2	Lymphoids	Tcells	CD4	not kept	CD4
GSM816028	GSE32959	Cord blood Activated CD4+ 24h + IL4	Th2	Lymphoids	Tcells	CD4	not kept	CD4
GSM816029	GSE32959	Cord blood Activated CD4+ 48h + IL4	Th2	Lymphoids	Tcells	CD4	not kept	CD4
GSM816030	GSE32959	Cord blood Activated CD4+ 48h + IL4	Th2	Lymphoids	Tcells	CD4	not kept	CD4
GSM816031	GSE32959	Cord blood Activated CD4+ 48h + IL4	Th2	Lymphoids	Tcells	CD4	not kept	CD4
GSM816032	GSE32959	Cord blood Activated CD4+ 72h + IL4	Th2	Lymphoids	Tcells	CD4	not kept	CD4
GSM816033	GSE32959	Cord blood Activated CD4+ 72h + IL4	Th2	Lymphoids	Tcells	CD4	not kept	CD4
GSM816034	GSE32959	Cord blood Activated CD4+ 72h + IL4	Th2	Lymphoids	Tcells	CD4	not kept	CD4
GSM816035	GSE32959	Cord blood CD4+	CD4 T cells	Lymphoids	Tcells	CD4	not kept	CD4
GSM816036	GSE32959	Cord blood CD4+	CD4 T cells	Lymphoids	Tcells	CD4	not kept	CD4
GSM816037	GSE32959	Cord blood CD4+	CD4 T cells	Lymphoids	Tcells	CD4	not kept	CD4
GSM900526	GSE36769	From Peripheral Blood.CD4+.	CD4 T cells	lymphoids	Tcells	CD4	not kept	CD4
GSM900527	GSE36769	From Peripheral Blood.CD4+.	CD4 T cells	lymphoids	Tcells	CD4	not kept	CD4
GSM900528	GSE36769	From Peripheral Blood.CD4+.	CD4 T cells	lymphoids	Tcells	CD4	not kept	CD4
GSM900529	GSE36769	From Peripheral Blood.CD4+.	CD4 T cells	lymphoids	Tcells	CD4	not kept	CD4
GSM900530	GSE36769	From Peripheral Blood of Breast Cancer.CD4+.	CD4 T cells	lymphoids	Tcells	CD4	not kept	CD4
GSM900531	GSE36769	From Peripheral Blood of Breast Cancer.CD4+.	CD4 T cells	lymphoids	Tcells	CD4	not kept	CD4
GSM900532	GSE36769	From Peripheral Blood of Breast Cancer.CD4+.	CD4 T cells	lymphoids	Tcells	CD4	not kept	CD4
GSM900533	GSE36769	From Peripheral Blood of Breast Cancer.CD4+.	CD4 T cells	lymphoids	Tcells	CD4	not kept	CD4
GSM900534	GSE36769	From Peripheral Blood of Breast Cancer.CD4+.	CD4 T cells	lymphoids	Tcells	CD4	not kept	CD4
GSM900535	GSE36769	From Peripheral Blood of Breast Cancer.CD4+.	CD4 T cells	lymphoids	Tcells	CD4	not kept	CD4
GSM900536	GSE36769	From Peripheral Blood of Breast Cancer.CD4+.	CD4 T cells	lymphoids	Tcells	CD4	not kept	CD4
GSM900537	GSE36769	From Peripheral Blood of Breast Cancer.CD4+.	CD4 T cells	lymphoids	Tcells	CD4	not kept	CD4
GSM900538	GSE36769	From Peripheral Blood of Breast Cancer.CD4+.	CD4 T cells	lymphoids	Tcells	CD4	not kept	CD4
GSM900539	GSE36769	From Peripheral Blood of Breast Cancer.CD4+.	CD4 T cells	lymphoids	Tcells	CD4	not kept	CD4
GSM900540	GSE36769	From Lymph Node of Breast Cancer.CD4+.	CD4 T cells	lymphoids	Tcells	CD4	not kept	CD4
GSM900541	GSE36769	From Lymph Node of Breast Cancer.CD4+.	CD4 T cells	lymphoids	Tcells	CD4	not kept	CD4
GSM900542	GSE36769	From Lymph Node of Breast Cancer.CD4+.	CD4 T cells	lymphoids	Tcells	CD4	not kept	CD4
GSM900543	GSE36769	From Lymph Node of Breast Cancer.CD4+.	CD4 T cells	lymphoids	Tcells	CD4	not kept	CD4
GSM900544	GSE36769	From Lymph Node of Breast Cancer.CD4+.	CD4 T cells	lymphoids	Tcells	CD4	not kept	CD4
GSM900545	GSE36769	From Lymph Node of Breast Cancer.CD4+.	CD4 T cells	lymphoids	Tcells	CD4	not kept	CD4
GSM900546	GSE36769	From Lymph Node of Breast Cancer.CD4+.	CD4 T cells	lymphoids	Tcells	CD4	not kept	CD4
GSM900547	GSE36769	From Lymph Node of Breast Cancer.CD4+.	CD4 T cells	lymphoids	Tcells	CD4	not kept	CD4
GSM900548	GSE36769	From Lymph Node of Breast Cancer.CD4+.	CD4 T cells	lymphoids	Tcells	CD4	not kept	CD4
GSM900549	GSE36769	From Lymph Node of Breast Cancer.CD4+.	CD4 T cells	lymphoids	Tcells	CD4	not kept	CD4
GSM900560	GSE36769	From Peripheral Blood.CD4+.CD45RA-	Memory CD4 T cells	lymphoids	Tcells	CD4	not kept	CD4
GSM900561	GSE36769	From Peripheral Blood.CD4+.CD45RA-	Memory CD4 T cells	lymphoids	Tcells	CD4	not kept	CD4
GSM900562	GSE36769	From Peripheral Blood.CD4+.CD45RA-	Memory CD4 T cells	lymphoids	Tcells	CD4	not kept	CD4
GSM900563	GSE36769	From Peripheral Blood.CD4+.CD45RA-.Healthy+24h treatment with SN from breast cancer	Memory CD4 T cells	lymphoids	Tcells	CD4	not kept	CD4
GSM900564	GSE36769	From Peripheral Blood.CD4+.CD45RA-.Healthy+24h treatment with SN from breast cancer	Memory CD4 T cells	lymphoids	Tcells	CD4	not kept	CD4
GSM900565	GSE36769	From Peripheral Blood.CD4+.CD45RA-.Healthy+24h treatment with SN from breast cancer	Memory CD4 T cells	lymphoids	Tcells	CD4	not kept	CD4
GSM900566	GSE36769	From Peripheral Blood.CD4+.CD45RA-.Healthy+24h treatment with SN from breast cancer	Memory CD4 T cells	lymphoids	Tcells	CD4	not kept	CD4
GSM900567	GSE36769	From Peripheral Blood.CD4+.CD45RA-.Healthy+ 24h stimulation	Memory CD4 T cells	lymphoids	Tcells	CD4	not kept	CD4
GSM900568	GSE36769	From Peripheral Blood.CD4+.CD45RA-.Healthy+ 24h stimulation	Memory CD4 T cells	lymphoids	Tcells	CD4	not kept	CD4
GSM900569	GSE36769	From Peripheral Blood.CD4+.CD45RA-.Healthy+ 24h stimulation	Memory CD4 T cells	lymphoids	Tcells	CD4	not kept	CD4
GSM900570	GSE36769	From Peripheral Blood.CD4+.CD45RA-.Healthy+ 24h stimulation(anti-CD3 + anti-CD28) & treatment with SN from breast cancer	Memory CD4 T cells	lymphoids	Tcells	CD4	not kept	CD4
GSM900571	GSE36769	From Peripheral Blood.CD4+.CD45RA-.Healthy+ 24h stimulation(anti-CD3 + anti-CD28) & treatment with SN from breast cancer	Memory CD4 T cells	lymphoids	Tcells	CD4	not kept	CD4
GSM900572	GSE36769	From Peripheral Blood.CD4+.CD45RA-.Healthy+ 24h stimulation(anti-CD3 + anti-CD28) & treatment with SN from breast cancer	Memory CD4 T cells	lymphoids	Tcells	CD4	not kept	CD4
GSM900573	GSE36769	From Peripheral Blood.CD4+.CD45RA-.Healthy+ 24h stimulation(anti-CD3 + anti-CD28) & treatment with SN from breast cancer	Memory CD4 T cells	lymphoids	Tcells	CD4	not kept	CD4
GSM900576	GSE36769	From Breast Tumor.CD4+.	CD4 T cells	lymphoids	Tcells	CD4	not kept	CD4
GSM900577	GSE36769	From Breast Tumor.CD4+.24 h incubation in X-VIVO 20	CD4 T cells	lymphoids	Tcells	CD4	not kept	CD4
GSM900578	GSE36769	From Peripheral Blood.CD4+.CD45RA-.	Memory CD4 T cells	lymphoids	Tcells	CD4	not kept	CD4
GSM900579	GSE36769	From Peripheral Blood.CD4+.CD45RA-.24 h incubation in X-VIVO 20	Memory CD4 T cells	lymphoids	Tcells	CD4	not kept	CD4
GSM900580	GSE36769	From Peripheral Blood.CD4+.	CD4 T cells	lymphoids	Tcells	CD4	not kept	CD4
GSM900581	GSE36769	From Peripheral Blood.CD4+.	CD4 T cells	lymphoids	Tcells	CD4	not kept	CD4
GSM900582	GSE36769	From Peripheral Blood.CD4+.	CD4 T cells	lymphoids	Tcells	CD4	not kept	CD4
GSM900583	GSE36769	From Peripheral Blood.CD4+.+ 24h treatment with SN from breast cancer	CD4 T cells	lymphoids	Tcells	CD4	not kept	CD4
GSM900584	GSE36769	From Peripheral Blood.CD4+.+ 24h treatment with SN from breast cancer	CD4 T cells	lymphoids	Tcells	CD4	not kept	CD4
GSM900585	GSE36769	From Peripheral Blood.CD4+.+ 24h treatment with SN from breast cancer	CD4 T cells	lymphoids	Tcells	CD4	not kept	CD4
TW1675_u133plus2_061004	E-TABM-40	CD8+ naive CD8 T cell	CD8 T cells	lymphoids	Tcells	CD8	Naive	Naive
TW1676_u133plus2_061004	E-TABM-40	CD8+ central memory T cell	CD8 T cells	lymphoids	Tcells	CD8	Memory	CM
TW1677_u133plus2_061004	E-TABM-40	CD8+ effector memory T cell	CD8 T cells	lymphoids	Tcells	CD8	Memory	EM
TW1678_u133plus2_061004	E-TABM-40	CD8+ effector memory RA T cell	CD8 T cells	lymphoids	Tcells	CD8	Memory	EMRA
TW1679_u133plus2_061004	E-TABM-40	CD8+ naive CD8 T cell	CD8 T cells	lymphoids	Tcells	CD8	Naive	Naive
TW1680_u133plus2_061004	E-TABM-40	CD8+ central memory T cell	CD8 T cells	lymphoids	Tcells	CD8	Memory	CM
TW1681_u133plus2_061004	E-TABM-40	CD8+ effector memory T cell	CD8 T cells	lymphoids	Tcells	CD8	Memory	EM
TW1682_u133plus2_061004	E-TABM-40	CD8+ effector memory RA T cell	CD8 T cells	lymphoids	Tcells	CD8	Memory	EMRA
TW1683_u133plus2_061004	E-TABM-40	CD8+ naive CD8 T cell	CD8 T cells	lymphoids	Tcells	CD8	Naive	Naive
TW1684_u133plus2_061004	E-TABM-40	CD8+ central memory T cell	CD8 T cells	lymphoids	Tcells	CD8	Memory	CM
TW1685_u133plus2_061004	E-TABM-40	CD8+ effector memory T cell	CD8 T cells	lymphoids	Tcells	CD8	Memory	EM
TW1686_u133plus2_061004	E-TABM-40	CD8+ effector memory RA T cell	CD8 T cells	lymphoids	Tcells	CD8	Memory	EMRA
TW1687_u133plus2_061004	E-TABM-40	CD8+ naive CD8 T cell	CD8 T cells	lymphoids	Tcells	CD8	Naive	Naive
TW1688_u133plus2_061004	E-TABM-40	CD8+ central memory T cell	CD8 T cells	lymphoids	Tcells	CD8	Memory	CM
TW1689_u133plus2_061004	E-TABM-40	CD8+ effector memory T cell	CD8 T cells	lymphoids	Tcells	CD8	Memory	EM
TW1690_u133plus2_061004	E-TABM-40	CD8+ effector memory RA T cell	CD8 T cells	lymphoids	Tcells	CD8	Memory	EMRA

## Sheet: RNAseq
Source Name	Cell type	Organism	Subpopulation	CD8 type
SRR1647782-SRR1647781	CD8+ T cells	Homo sapiens	CD62L-CX3CR1-	memory
SRR1647780-SRR1647779	CD8+ T cells	Homo sapiens	CD62L-CX3CR1+	effector
SRR1647778-SRR1647777	CD8+ T cells	Homo sapiens	CD62L+CX3CR1+	effector
SRR1647776-SRR1647775	CD8+ T cells	Homo sapiens	Naive	naive
SRR1647774-SRR1647773	CD8+ T cells	Homo sapiens	CD62L-CX3CR1-	memory
SRR1647772-SRR1647771	CD8+ T cells	Homo sapiens	CD62L-CX3CR1+	effector
SRR1647770-SRR1647769	CD8+ T cells	Homo sapiens	CD62L+CX3CR1-	memory
SRR1647768-SRR1647767	CD8+ T cells	Homo sapiens	CD62L+CX3CR1+	effector
SRR1647766-SRR1647765	CD8+ T cells	Homo sapiens	Naive	naive
SRR1647764-SRR1647763	CD8+ T cells	Homo sapiens	CD62L-CX3CR1-	memory
SRR1647762-SRR1647761	CD8+ T cells	Homo sapiens	CD62L-CX3CR1+	effector
SRR1647760-SRR1647759	CD8+ T cells	Homo sapiens	CD62L+CX3CR1-	memory
SRR1647758-SRR1647757	CD8+ T cells	Homo sapiens	CD62L+CX3CR1+	effector
SRR1647756-SRR1647755	CD8+ T cells	Homo sapiens	Naive	naive
SRR1647754-SRR1647753	CD8+ T cells	Homo sapiens	CD62L-CX3CR1-	memory
SRR1647752-SRR1647751	CD8+ T cells	Homo sapiens	CD62L-CX3CR1+	effector
SRR1647750-SRR1647749	CD8+ T cells	Homo sapiens	CD62L+CX3CR1-	memory
