# Supplementary material for: Evaluation of tumor immune contexture among intrinsic molecular subtypes helps to predict outcome in early breast cancer
Source: HighWire-hosted journal article supplement (doi:10.1136/jitc-2020-002036), 2021-06-01
Supplement: jitc-2020-002036supp005_data_supplement.xlsx [file jitc-2020-002036supp005_data_supplement.xlsx]

## Sheet: Cohorts' characteristics
Baseline patient and primary tumor characteristics
	Kmplot			GEO			CIT			Total
Variable	N	%	% valid	N	%	% valid	N	%	% valid	N	%	% valid
Age
<=50	254	14.04	33.38	115	24.63	32.86	181	33.71	34.61	550	19.55	33.66
>50	507	28.03	66.62	235	50.32	67.14	342	63.69	65.39	1084	38.54	66.34
Missing	1048	57.93		117	25.05		14	2.61		1179	41.91
Tumor grade
1	198	10.95	18.97	41	8.78	11.52	47	8.75	9.11	286	10.17	14.93
2	534	29.52	51.15	188	40.26	52.81	271	50.47	52.52	993	35.3	51.83
3	312	17.25	29.89	127	27.19	35.67	198	36.87	38.37	637	22.64	33.25
Missing	765	42.29		111	23.77		21	3.91		897	31.89
T-stage
T0	6	0.33	0.66	0	0	0	4	0.74	0.92	10	0.36	0.63
T1	464	25.65	51.21	78	16.7	32.1	136	25.33	31.34	678	24.1	42.83
T2	419	23.16	46.25	153	32.76	62.96	254	47.3	58.53	826	29.36	52.18
T3	17	0.94	1.88	12	2.57	4.94	40	7.45	9.22	69	2.45	4.36
Missing	903	49.92		224	47.97		103	19.18		1230	43.73
Lymph Node
0	1179	65.17	86.12	111	23.77	50.45	139	25.88	31.81	1429	50.8	70.53
1	190	10.5	13.88	109	23.34	49.55	298	55.49	68.19	597	21.22	29.47
Missing	440	24.32		247	53.1		100	18.62		787	27.98
ER status
0	263	14.54	21.36	200	42.83	43.29	108	20.11	20.97	571	20.3	25.86
1	968	53.51	78.64	262	56.1	56.71	407	75.79	79.03	1637	58.19	74.14
Missing	578	31.95		5	1.07		22	4.1		605	21.51
HER2 status
0	42	2.32	93.33	284	60.81	80.45	340	63.31	86.96	666	23.68	84.41
1	3	0.17	6.67	69	14.78	19.55	51	9.5	13.04	123	4.37	15.59
Missing	1764	97.51		114	24.41		146	27.19		2024	71.95
Adjuvant chemo
0	1035	57.21	98.01	55	11.78	41.98
1	21	1.16	1.99	76	16.27	58.02
Missing	753	41.63		336	71.95
Adjuvant hormono therapy
0	746	41.24	70.78	54	11.56	41.22
1	308	17.03	29.22	77	16.49	58.78

## Sheet: Model with interaction RFS
Multivariate Cox model for Relapse Free Survival for the model combining “PAM50” and “TIC” information, including interactions between the estimated quantities of immune cells and the PAM50 levels
Variables	Hratio	95% IC	p-value
Bcells	0.972	[0.770; 1.227]	0.81
PlasmaCells	0.852	[0.675; 1.076]	0.18
Tgd	0.920	[0.761; 1.183]	0.52
EM	0.960	[0.732; 1.273]	0.77
Plasmacytoids	1.146	[0.988; 1.328]	0.07
Luminal A	0.574	[0.446; 0.740]	1.8e-5
N
0
1	1.930	[1.503; 2.480]	2.7e-7
Size tumor (T)
1
2	1.346	[1.058; 1.715]	0.02
3	3.612	[1.450; 8.999]	0.006
CM:HER2	0.960	[0.792; 1.165]	0.68
CM:LumB	0.839	[0.627; 1.121]	0.23
Naive:LumA	1.189	[0.966; 1.464]	0.10
Dendritic:Her2	0.781	[0.560; 1.090]	0.15
Plasmacytoids:LumB	1.123	[0.929; 1.359]	0.23

## Sheet: Model with interaction OS
Multivariate Cox model for Overall Survival for the model combining “PAM50” and “TIC” information, including interactions between the estimated quantities of immune cells and the PAM50 levels
Variables	Hratio	95% IC	p-value
Nkcells	0.626	[0.198;1.980]	0.43
PlasmaCells	0.759	[0.400;1.419]	0.40
CD4	0.747	[0.136;4.113]	0.74
CM	1.193	[0.663;2.148]	0.56
EM	0.582	[0.119;2.838]	0.50
Dendritic	1.101	[0.616;1.969]	0.74
Granulocytes	2.590	[1.140;5.882]	0.02
Monocytes	0.510	[0.236;1.103]	0.09
LumA	0.217	[0.100;0.471]	0.0001
LumB	0.981	[0.492;1.957]	0.96
N
0
1	2.128	[1.224;3.698]	0.007
Size
T1
T2	1.395	[0.781;2.491]	0.26
T3	2.028	[0.861;4.777]	0.11
Nkcells:LumB	2.094	[0.769;5.703]	0.15
PlasmaCells:LumA	1.038	[0.439;2.459]	0.93
CM:HER2	2.712	[1.036;7.097]	0.04
CM:LumA	2.625	[0.940;5.461]	0.07
M2:Her2	1.190	[1.121;3.217]	0.02
M2:LumB	1.951	[1.010;3.771]	0.05
