# Supplementary material for: Evaluation of tumor immune contexture among intrinsic molecular subtypes helps to predict outcome in early breast cancer
Source: PubMed Central journal article supplement — J Immunother Cancer. 2021 Jun 3;9(6):e002036. doi: 10.1136/jitc-2020-002036 (PMC8183202; doi:10.1136/jitc-2020-002036), 2021-06-03
Supplement: jitc-2020-002036supp007.pdf [file jitc-2020-002036supp007.pdf]

**Supplemental Table 2**

| <b><u>Variables</u></b>   | <b><u>Hratio</u></b> | <b><u>95% IC</u></b> | <b><u>p-value</u></b> |
|---------------------------|----------------------|----------------------|-----------------------|
| <b>Bcells</b>             | 0.972                | [0.770; 1.227]       | 0.81                  |
| <b>PlasmaCells</b>        | 0.852                | [0.675; 1.076]       | 0.18                  |
| <b>Tgd</b>                | 0.920                | [0.761; 1.183]       | 0.52                  |
| <b>EM</b>                 | 0.960                | [0.732; 1.273]       | 0.77                  |
| <b>Plasmacytoids</b>      | 1.146                | [0.988; 1.328]       | 0.07                  |
| <b>Luminal A</b>          | 0.574                | [0.446; 0.740]       | 1.8e-5                |
| <b>N</b>                  |                      |                      |                       |
| 0                         |                      |                      |                       |
| 1                         | 1.930                | [1.503; 2.480]       | 2.7e-7                |
| <b>Size tumor (T)</b>     |                      |                      |                       |
| 1                         |                      |                      |                       |
| 2                         | 1.346                | [1.058; 1.715]       | 0.02                  |
| 3                         | 3.612                | [1.450; 8.999]       | 0.006                 |
| <b>CM:HER2</b>            | 0.960                | [0.792; 1.165]       | 0.68                  |
| <b>CM:LumB</b>            | 0.839                | [0.627; 1.121]       | 0.23                  |
| <b>Naive:LumA</b>         | 1.189                | [0.966; 1.464]       | 0.10                  |
| <b>Dendritic:Her2</b>     | 0.781                | [0.560; 1.090]       | 0.15                  |
| <b>Plasmacytoids:LumB</b> | 1.123                | [0.929; 1.359]       | 0.23                  |
