# Supplementary material for: Evaluation of tumor immune contexture among intrinsic molecular subtypes helps to predict outcome in early breast cancer
Source: PubMed Central journal article supplement — J Immunother Cancer. 2021 Jun 3;9(6):e002036. doi: 10.1136/jitc-2020-002036 (PMC8183202; doi:10.1136/jitc-2020-002036), 2021-06-03
Supplement: jitc-2020-002036supp008.pdf [file jitc-2020-002036supp008.pdf]

## Supplemental Table 3

| Cell type / Subgroup     | ER+    | ER-    | Basal  | Her2   | LumA   | LumB   |
|--------------------------|--------|--------|--------|--------|--------|--------|
| <i>Bcells</i>            | 0.0293 | 0.0373 | 0.0457 | 0.036  | 0.0268 | 0.0284 |
| <i>NKcells</i>           | 0.0026 | 0.0036 | 0.0043 | 0.0035 | 0.0023 | 0.0026 |
| <i>Plasma cells</i>      | 0.0054 | 0.0072 | 0.0082 | 0.0081 | 0.0046 | 0.0057 |
| <i>Tgd</i>               | 0.0008 | 0.0019 | 0.0029 | 0.0016 | 0.0006 | 0.0006 |
| <i>CD4 T-cells</i>       | 0.0198 | 0.0256 | 0.0294 | 0.0275 | 0.0174 | 0.0204 |
| <i>Naive CD8 T-cells</i> | 0.0003 | 0.0003 | 0.0005 | 0.0002 | 0.0003 | 0.0003 |
| <i>EM CD8 T-cells</i>    | 0.0013 | 0.0022 | 0.0026 | 0.0025 | 0.0009 | 0.0014 |
| <i>EMRA CD8 T-cells</i>  | 0.0000 | 0.0000 | 0.0000 | 0.0000 | 0.0000 | 0.0000 |
| <i>CM CD8 T-cells</i>    | 0.0003 | 0.0005 | 0.0005 | 0.0006 | 0.0002 | 0.0002 |
| <i>Granulocytes</i>      | 0.0016 | 0.0037 | 0.0036 | 0.0055 | 0.0009 | 0.0018 |
| <i>Monocytes</i>         | 0.0034 | 0.0059 | 0.0075 | 0.0064 | 0.003  | 0.0029 |
| <i>Dendritic</i>         | 0.0016 | 0.0047 | 0.0057 | 0.0052 | 0.001  | 0.0016 |
| <i>Plasmacytoids</i>     | 0.0009 | 0.0021 | 0.0023 | 0.0028 | 0.0006 | 0.0009 |
| <i>M1 Macrophages</i>    | 0.0031 | 0.0079 | 0.0085 | 0.01   | 0.0022 | 0.0033 |
| <i>M2 Macrophages</i>    | 0.0118 | 0.0256 | 0.0264 | 0.033  | 0.0095 | 0.0119 |
| <b>Total immune</b>      | 0.0822 | 0.1285 | 0.1481 | 0.1429 | 0.0703 | 0.082  |
