# Supplementary figures and images for: Evaluation of tumor immune contexture among intrinsic molecular subtypes helps to predict outcome in early breast cancer
Source: PubMed Central journal article supplement — J Immunother Cancer. 2021 Jun 3;9(6):e002036. doi: 10.1136/jitc-2020-002036 (PMC8183202; doi:10.1136/jitc-2020-002036), 2021-06-03

Figure S1

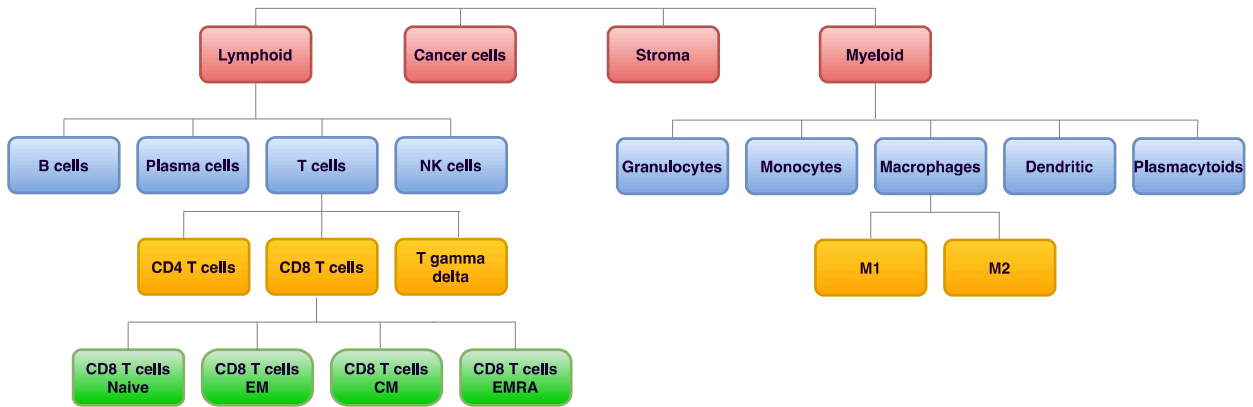

Supplement: jitc-2020-002036supp003.pdf [file jitc-2020-002036supp003.pdf]

# Figure S2

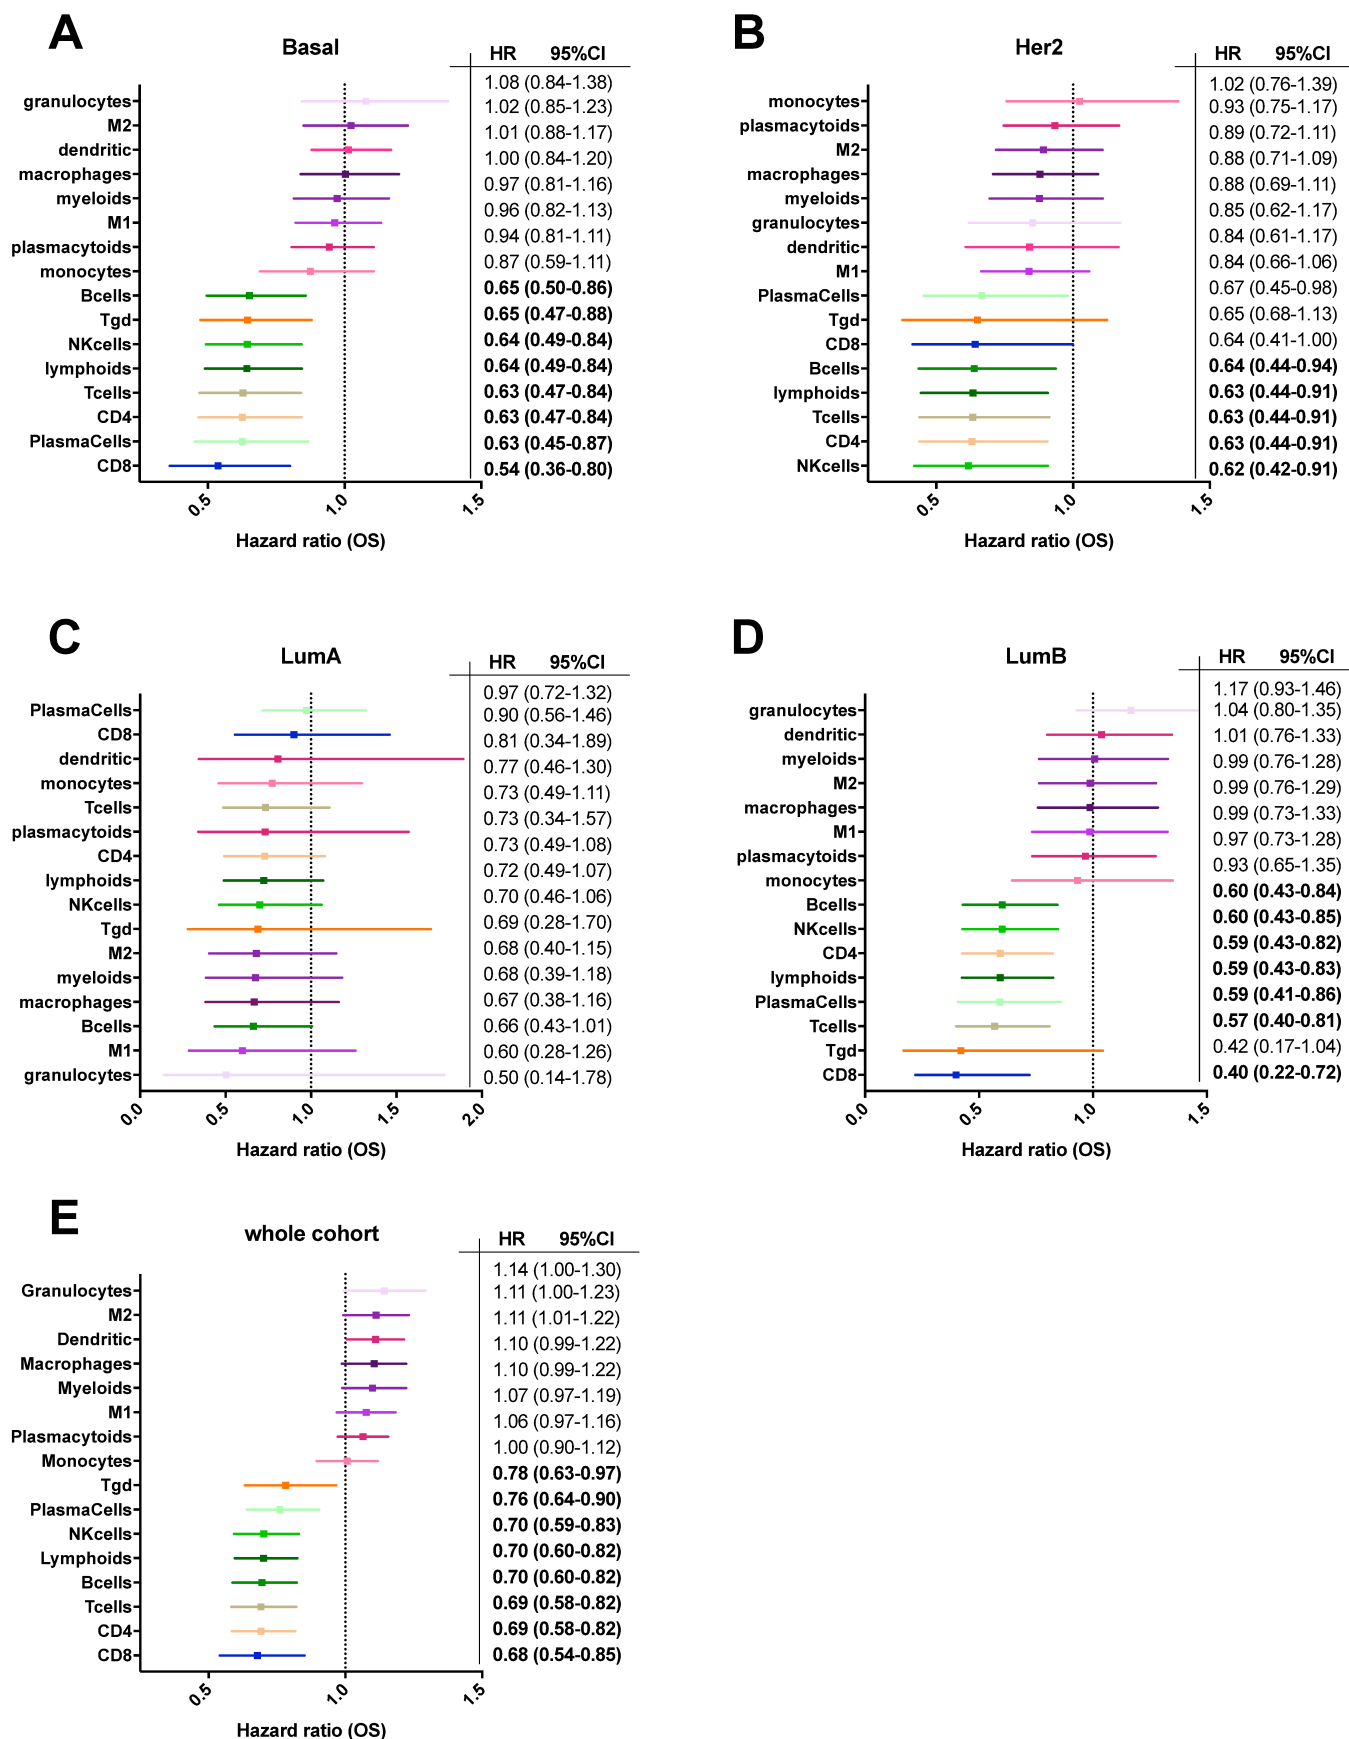

Supplement: jitc-2020-002036supp009.pdf [file jitc-2020-002036supp009.pdf]

Fig S3

A

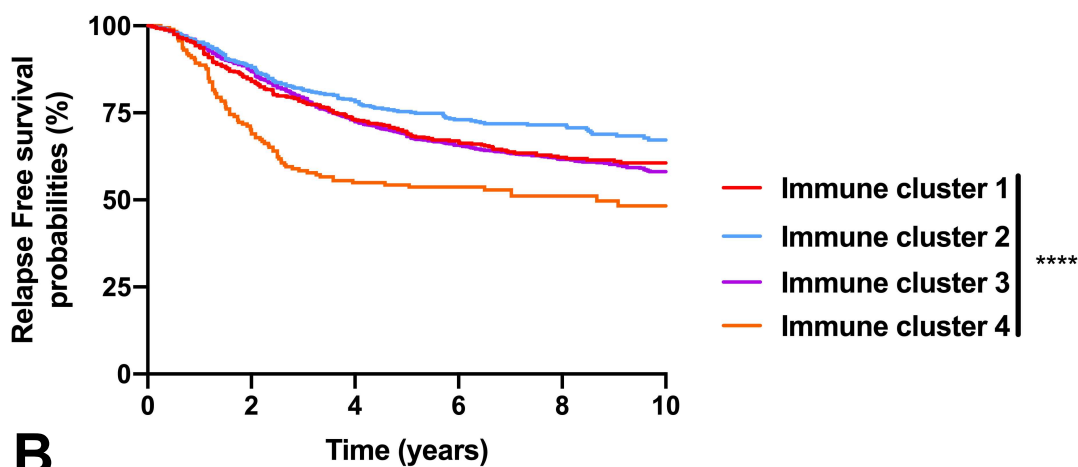

B

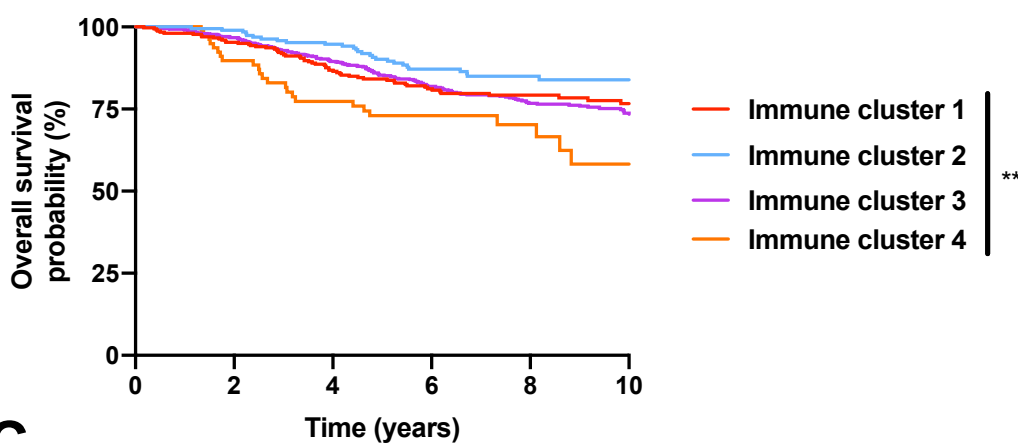

C

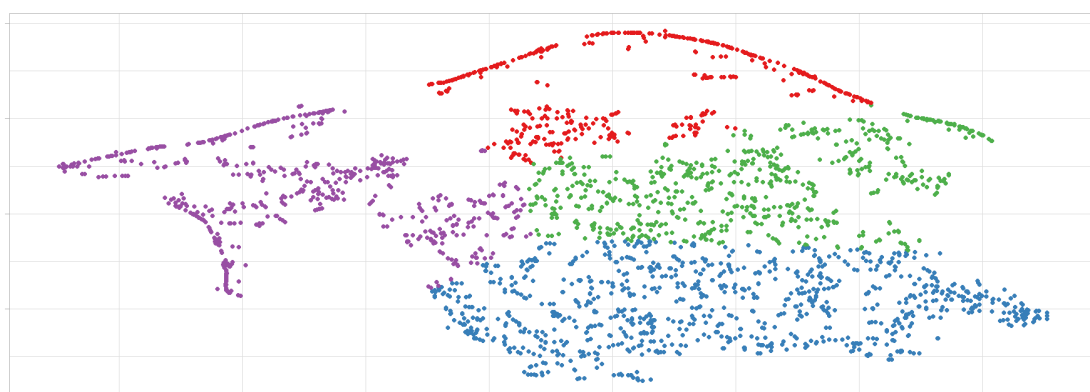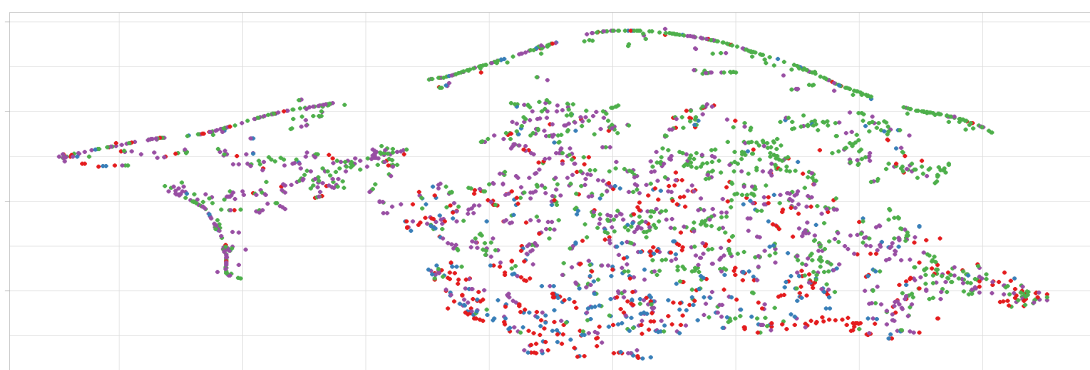

pam50 ● Basal ● Her2 ● LumA ● LumB

Supplement: jitc-2020-002036supp010.pdf [file jitc-2020-002036supp010.pdf]

Figure S4

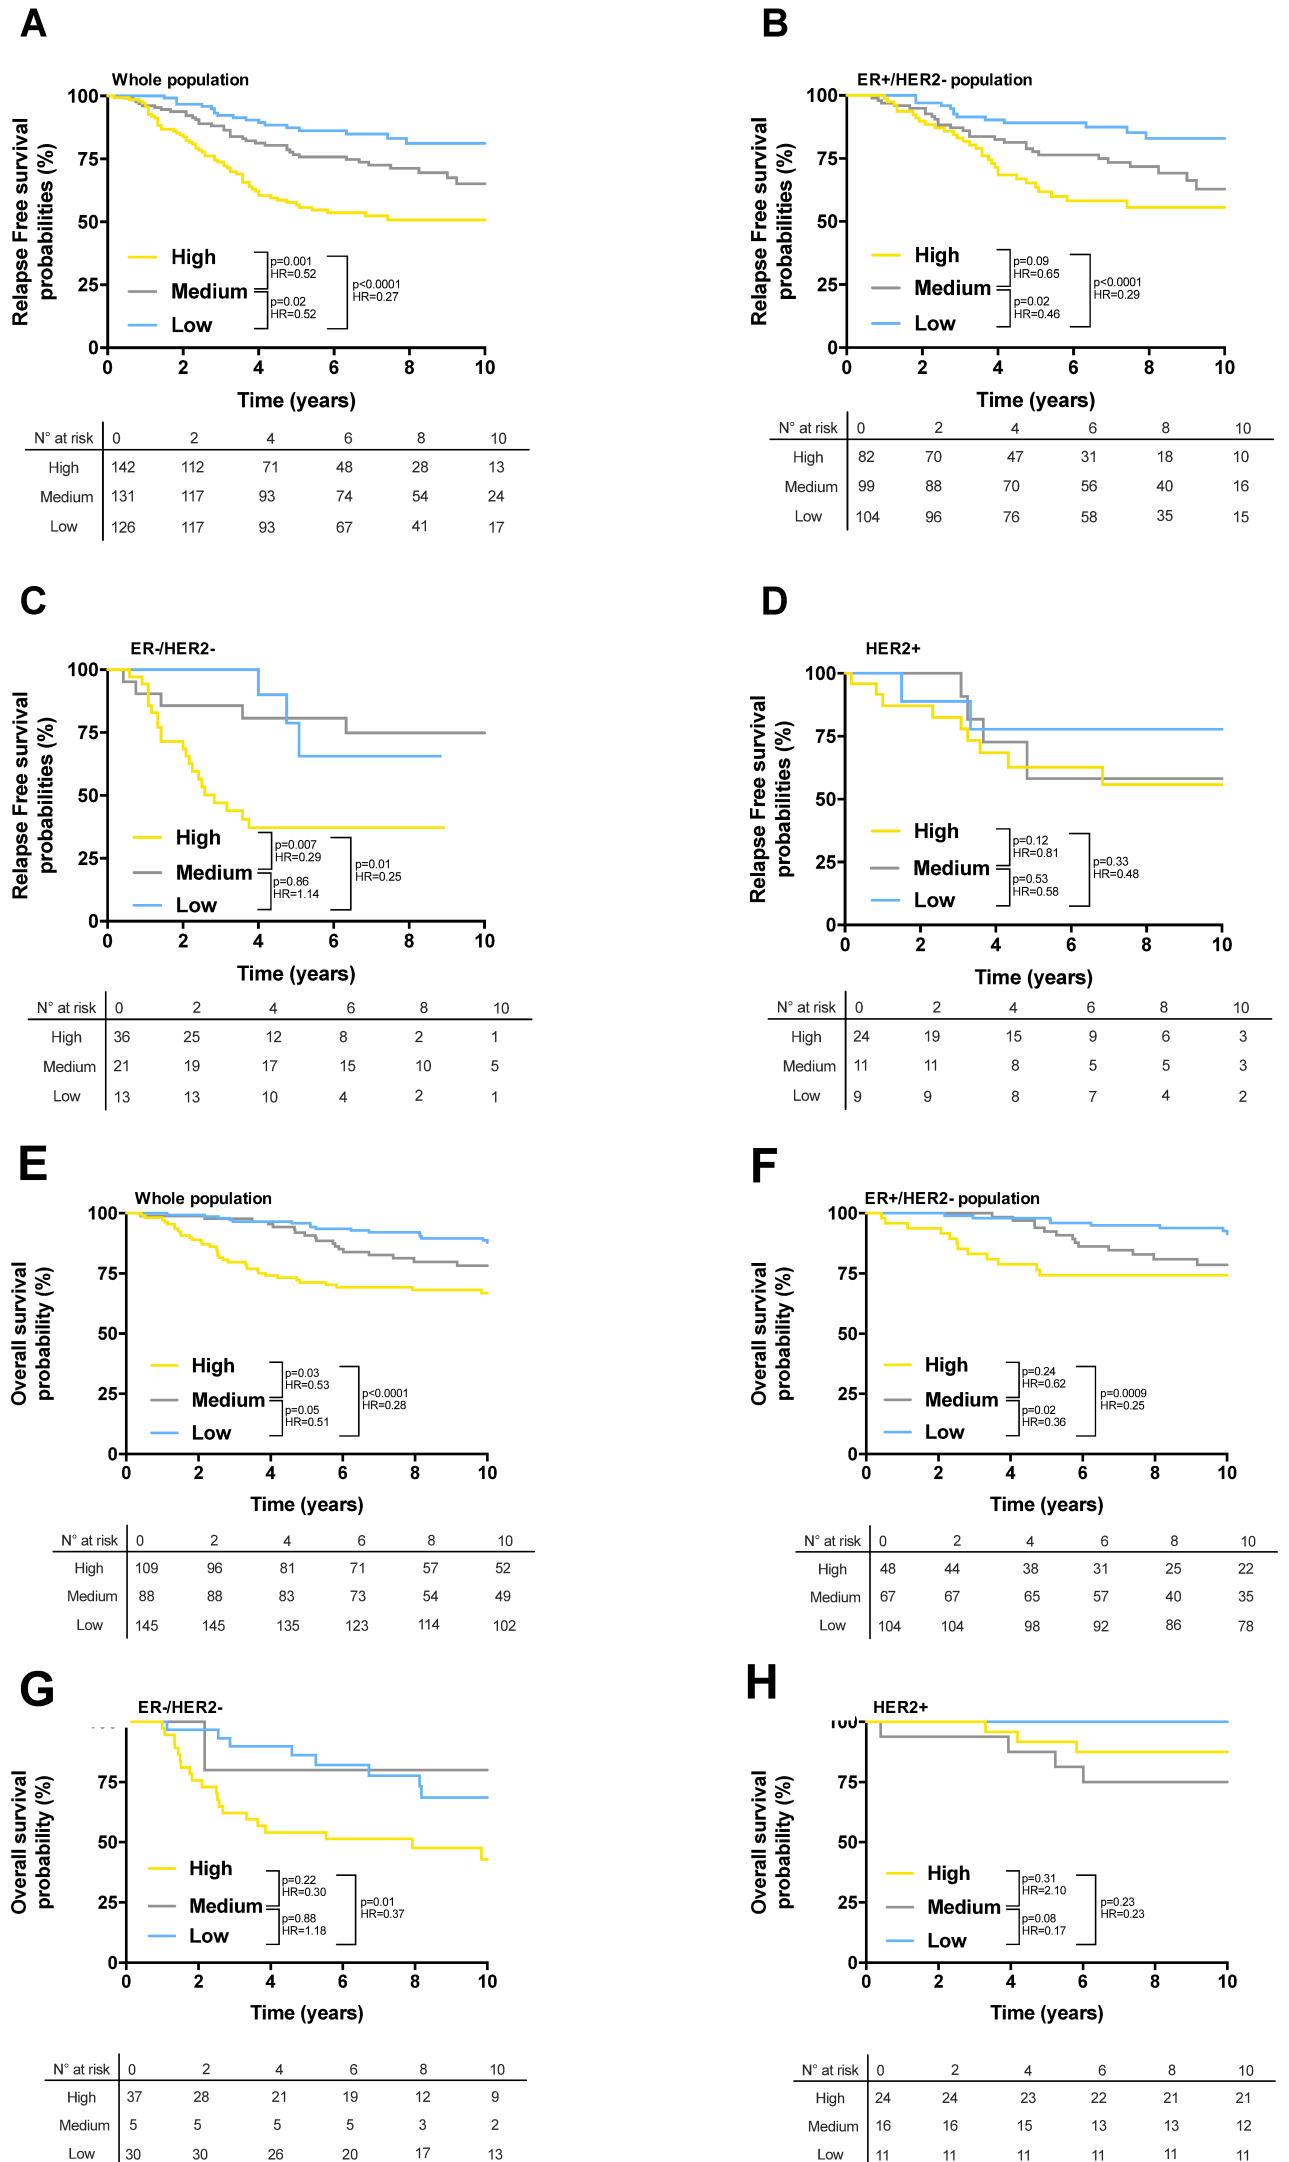

Supplement: jitc-2020-002036supp011.pdf [file jitc-2020-002036supp011.pdf]
